# Supplementary material for: Accuracy and Reproducibility in Quantification of Plasma Protein Concentrations by Mass Spectrometry without the Use of Isotopic Standards
Source: PubMed Central journal article supplement (PMC4608811; doi:10.1371/journal.pone.0140097), 2015-10-16
Supplement: pone.0140097.s001.pdf [file pone.0140097.s001.pdf]

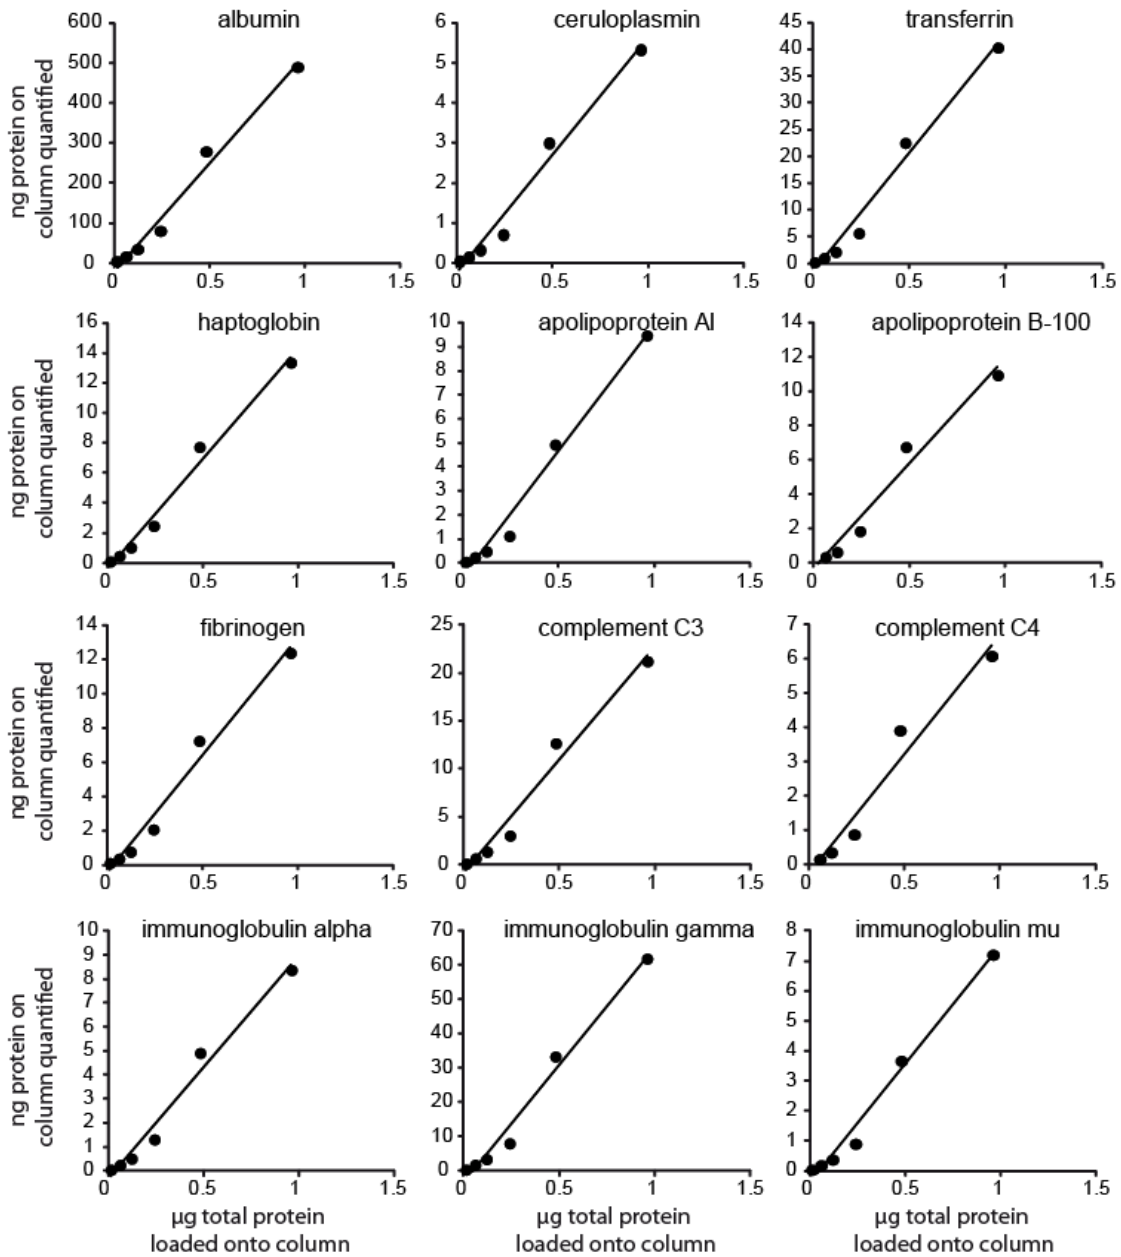

**S1 Fig. Linearity of HI3 peptide quantitation with increasing protein amount injected on column.** Dilutions of a plasma proteome digest were mixed with a fixed amount of ADH1 digest standard and injected. The amount in ng quantified using HI3 peptide signals is shown for 12 selected proteins.
