# Supplementary material for: Accuracy and Reproducibility in Quantification of Plasma Protein Concentrations by Mass Spectrometry without the Use of Isotopic Standards
Source: PubMed Central journal article supplement (PMC4608811; doi:10.1371/journal.pone.0140097), 2015-10-16
Supplement: pone.0140097.s002.pdf [file pone.0140097.s002.pdf]

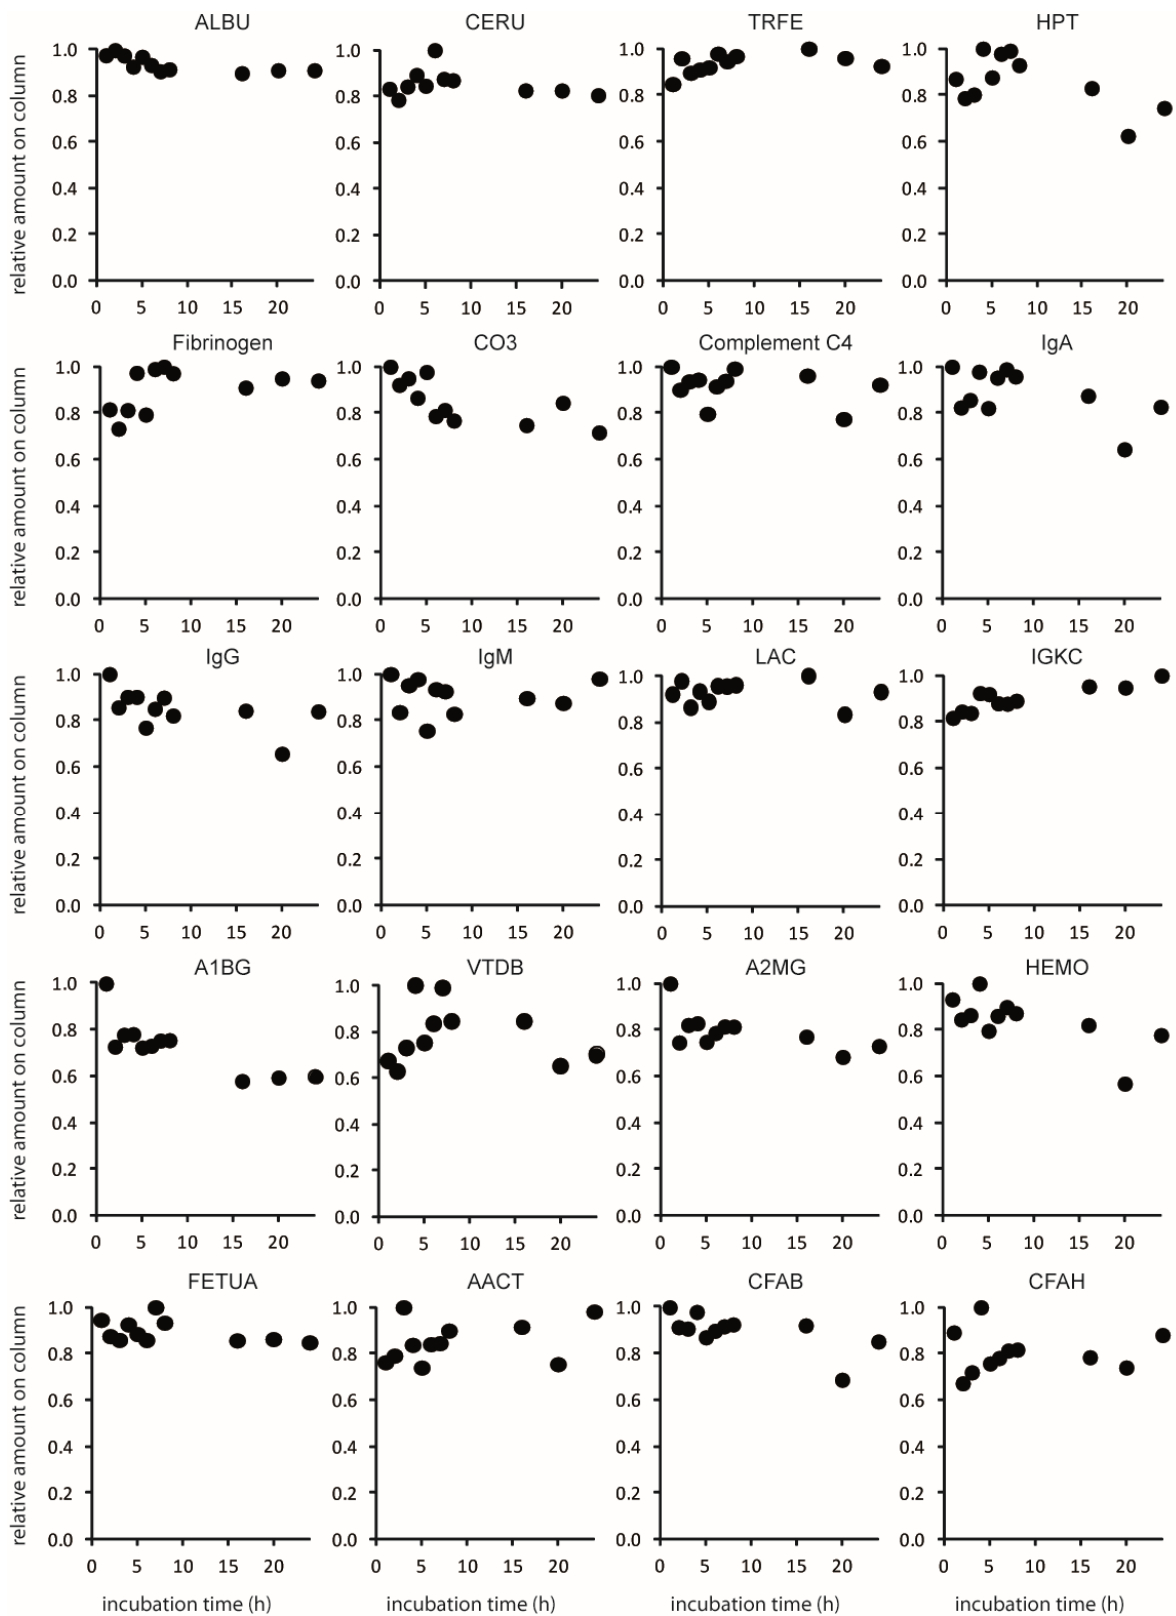

**S2 Fig. a Digestion time series of a pooled plasma proteome sample.** The digestion of a single plasma sample was followed over 24 hours. HI3 peptide summed intensities were normalized to the highest value measured in the time series for each protein

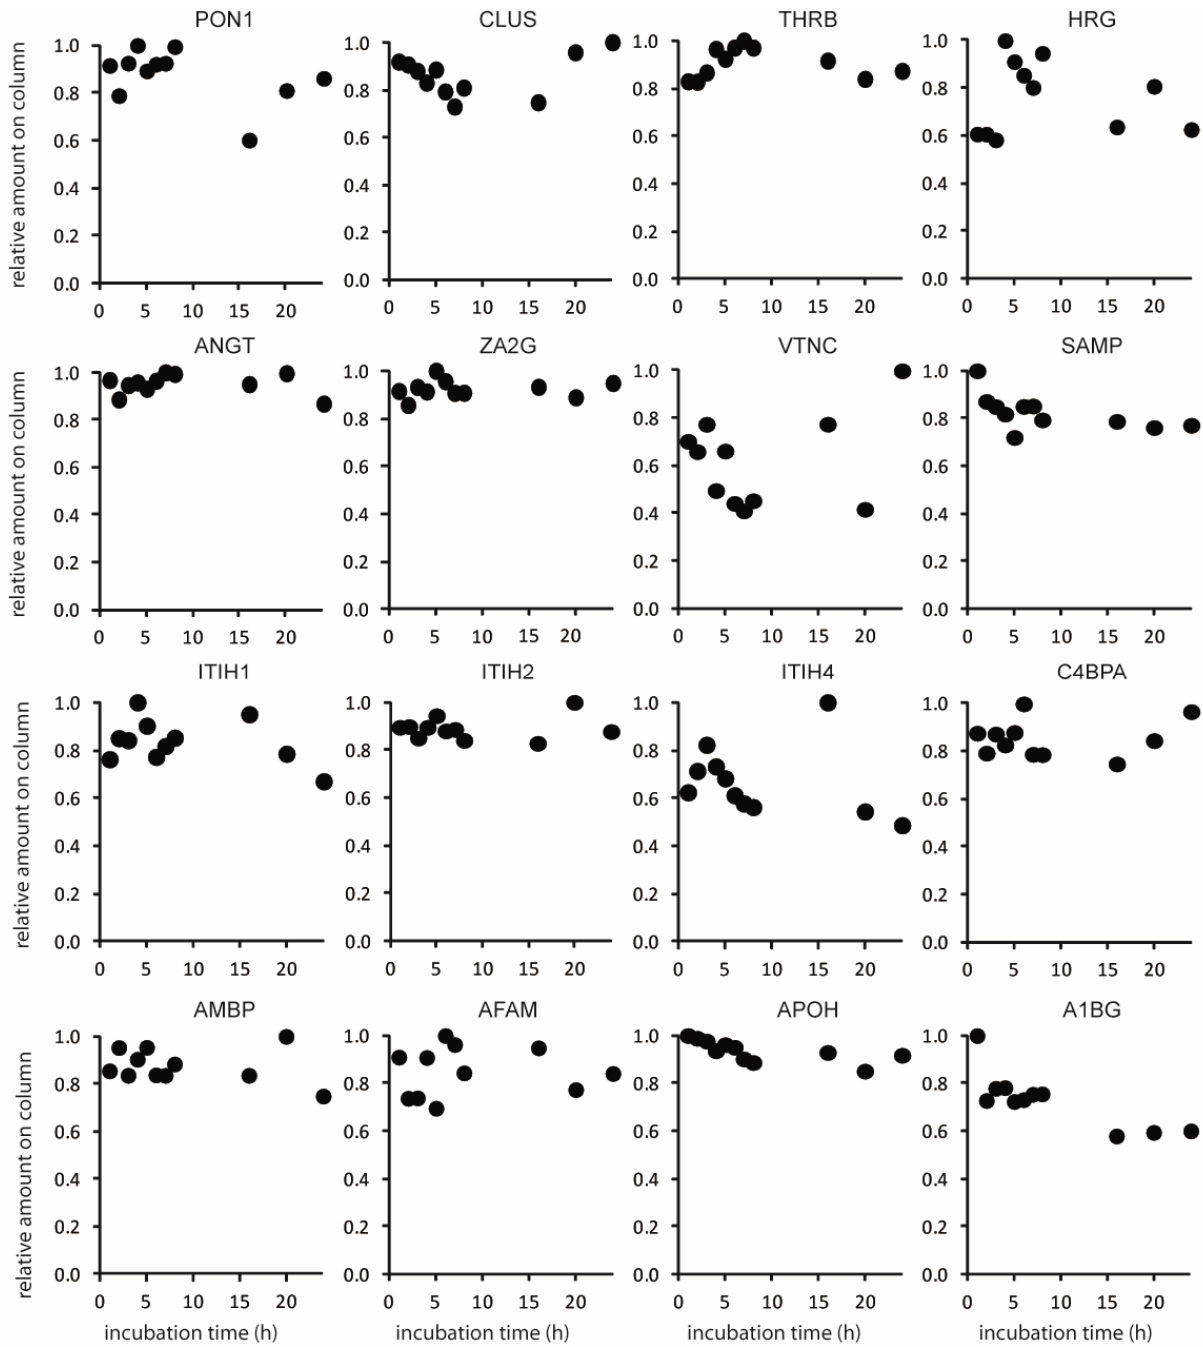

**S2 Fig. b Digestion time series of a pooled plasma proteome sample.** The digestion of a single plasma sample was followed over 24 hours. HI3 peptide summed intensities were normalized to the highest value measured in the time series for each protein

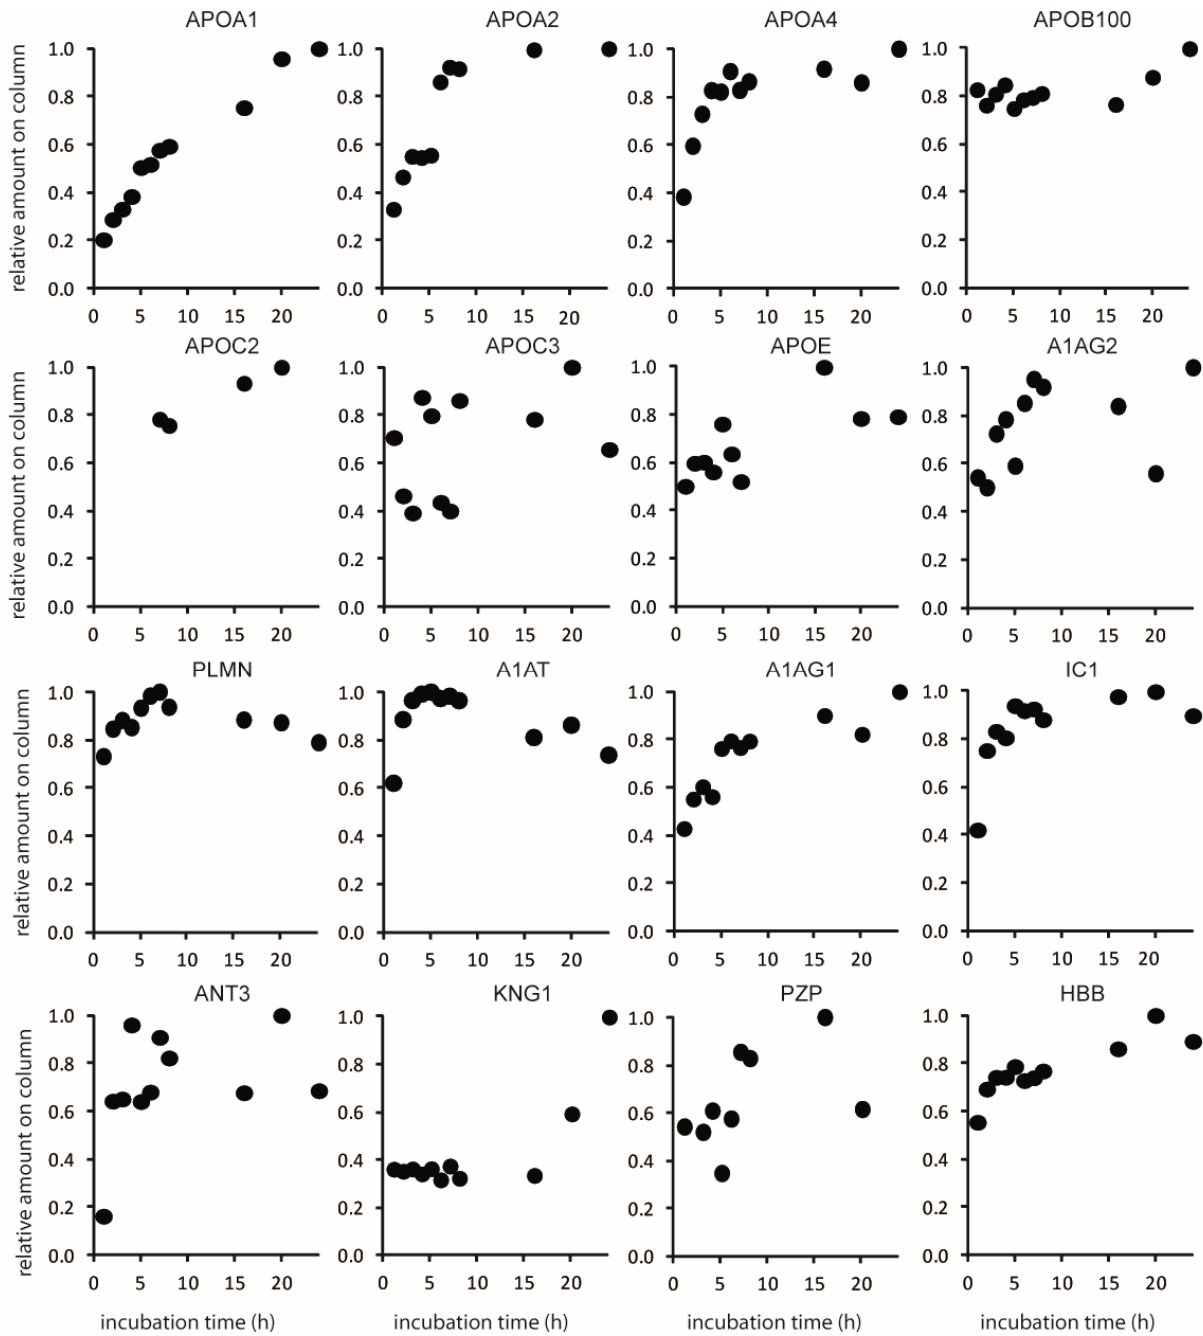

**S2 Fig. c Digestion time series of a pooled plasma proteome sample.** The digestion of a single plasma sample was followed over 24 hours. HI3 peptide summed intensities were normalized to the highest value measured in the time series for each protein
