# Supplementary material for: Accuracy and Reproducibility in Quantification of Plasma Protein Concentrations by Mass Spectrometry without the Use of Isotopic Standards
Source: PubMed Central journal article supplement (PMC4608811; doi:10.1371/journal.pone.0140097), 2015-10-16
Supplement: pone.0140097.s003.pdf [file pone.0140097.s003.pdf]

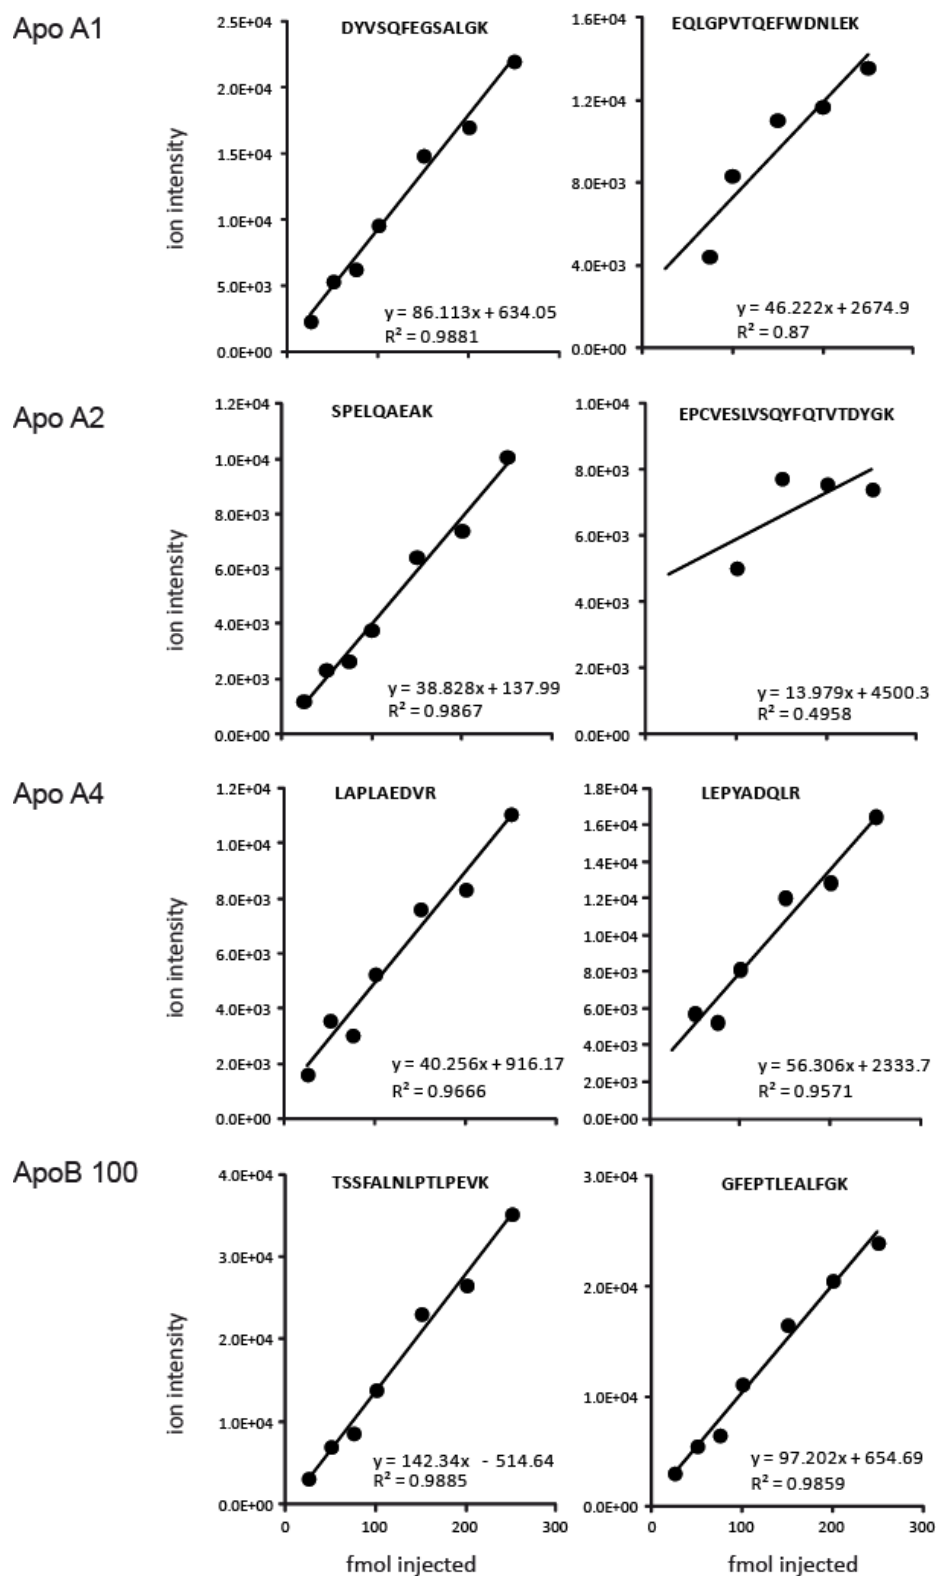

**S3 Fig a. Linearity of detection of individual peptides derived from QconCAT in a plasma background.** Increasing amounts of QconCAT added to a pooled plasma sample prior to digestion. Ion intensities of identified peptides are plotted against the amount (fmols) added. Formula and r<sup>2</sup> obtained are depicted

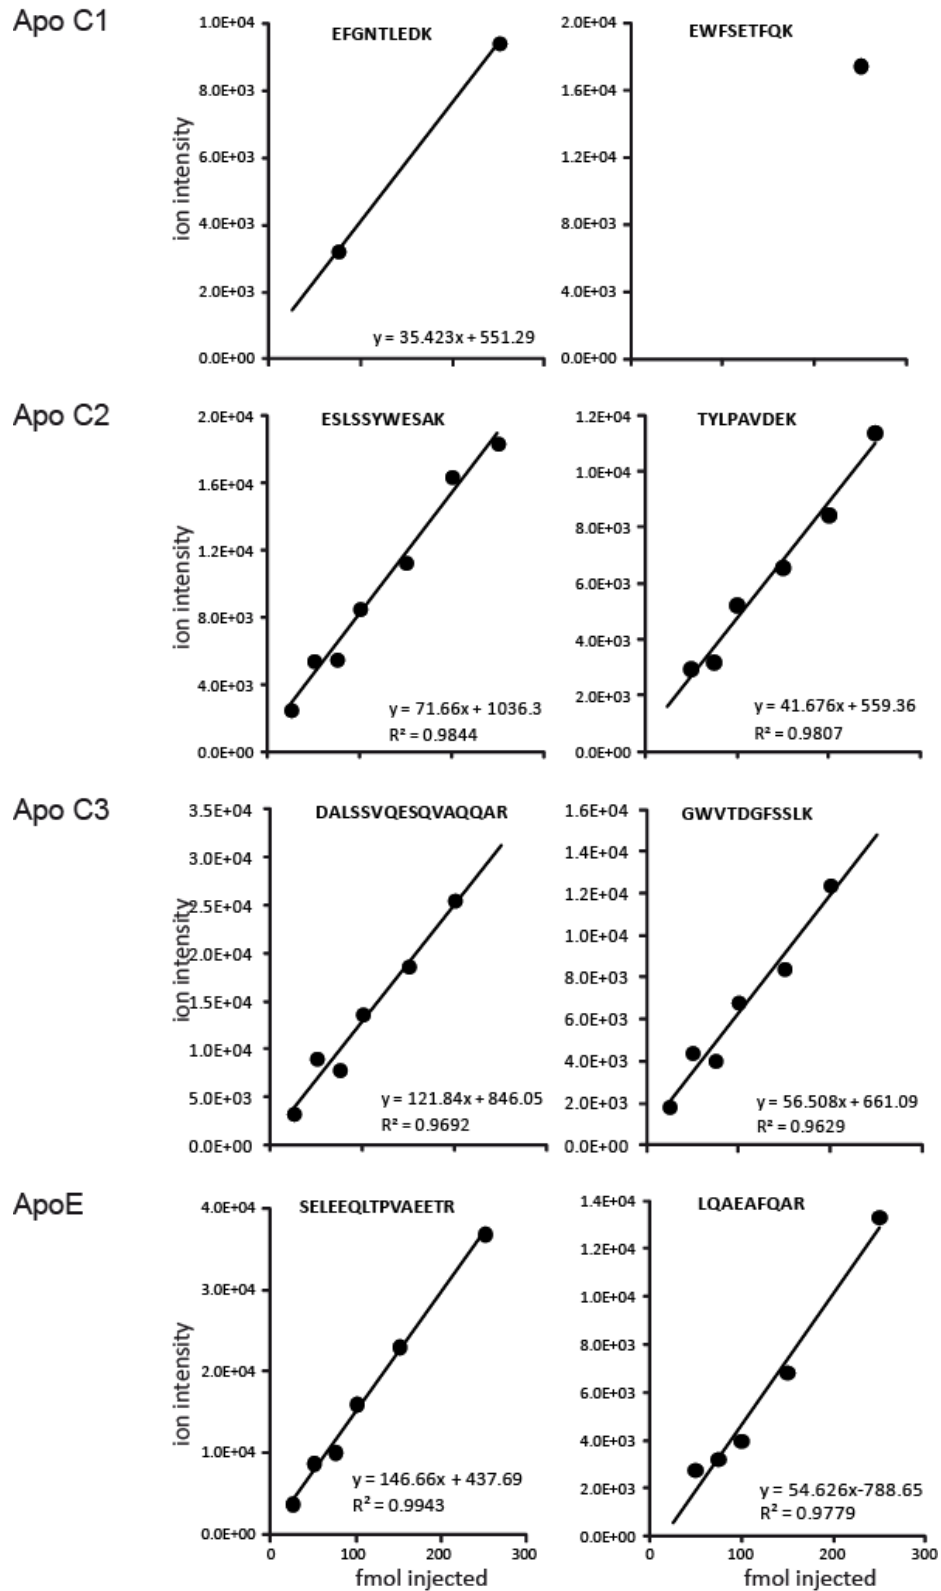

**S3 Fig b. Linearity of detection of individual peptides derived from QconCAT in a plasma background.** Increasing amounts of QconCAT added to a pooled plasma sample prior to digestion. Ion intensities of identified peptides are plotted against the amount (fmols) added. Formula and  $r^2$  obtained are depicted
