# Supplementary material for: Accuracy and Reproducibility in Quantification of Plasma Protein Concentrations by Mass Spectrometry without the Use of Isotopic Standards
Source: PubMed Central journal article supplement (PMC4608811; doi:10.1371/journal.pone.0140097), 2015-10-16
Supplement: pone.0140097.s004.pdf [file pone.0140097.s004.pdf]

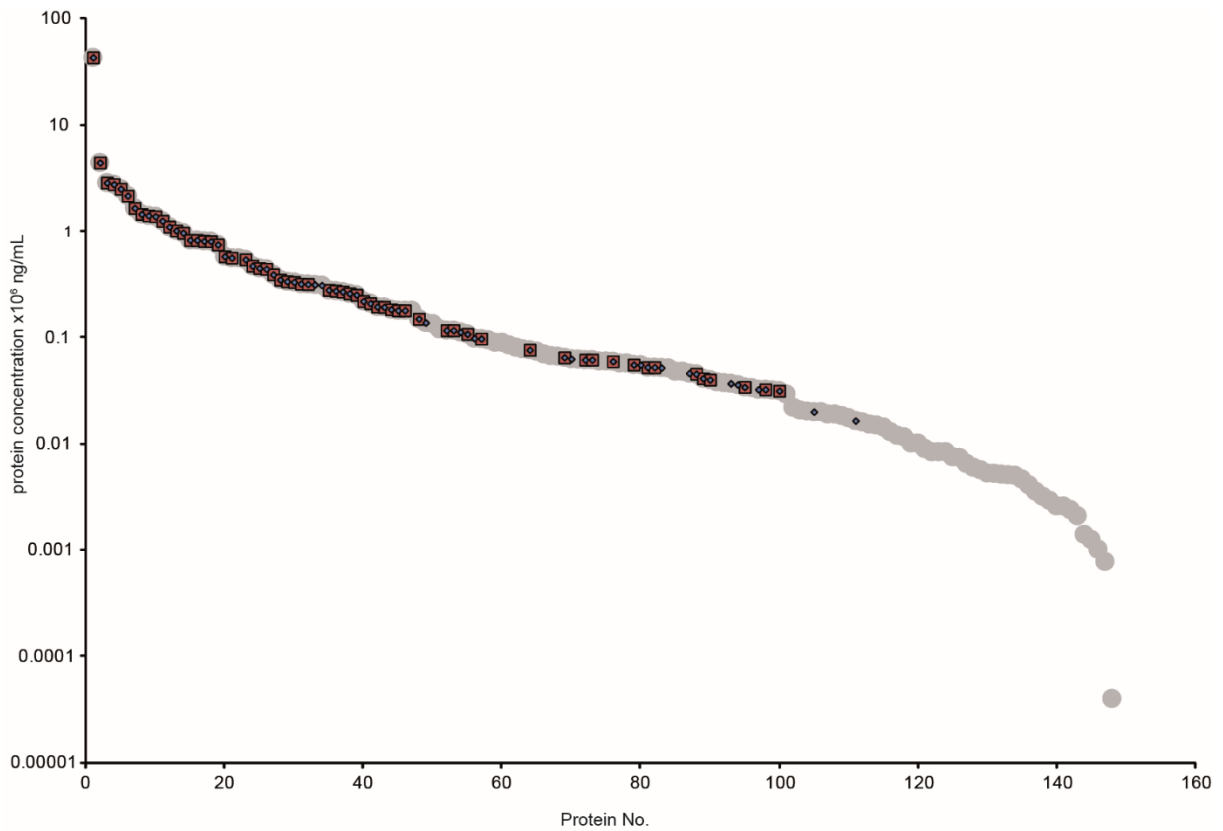

**S4 Fig. Reference concentrations of proteins identified by LCMS<sup>E</sup>.** Average concentration from Hortin *et al.* is shown (grey dots), proteins identified by LCMS analysis are shown by blue diamonds, proteins for which a quantitative value was also determined by HI3 peptide quantitation are indicated by red squares.
