# Supplementary material for: Accuracy and Reproducibility in Quantification of Plasma Protein Concentrations by Mass Spectrometry without the Use of Isotopic Standards
Source: PLoS One. 2015 Oct 16;10(10):e0140097. doi: 10.1371/journal.pone.0140097 (PMC4608811; doi:10.1371/journal.pone.0140097)
Supplement: S1 Table — (XLSX) [file pone.0140097.s005.xlsx]

## Sheet: Supplemental Table 1
				Supplemental Table 1. PGLS 2.5 Hi3 Protein Quantitative Data	Samples	1	2	3	4	5	6	7	8	9	10	11	12	13	14	15	16	17	18	19	20	21	22	23	24	25	26	27	28	29	30	31	AV samples	AV 1	AV 2	AV 3	AV 4	AV 5	AV 6	AV 7	AV 8	AV 9	AV 10	IAV samples	IAV 1
		No.	Accession No.	Description	No Injections	ng/mL	ng/mL	ng/mL	ng/mL	ng/mL	ng/mL	ng/mL	ng/mL	ng/mL	ng/mL	ng/mL	ng/mL	ng/mL	ng/mL	ng/mL	ng/mL	ng/mL	ng/mL	ng/mL	ng/mL	ng/mL	ng/mL	ng/mL	ng/mL	ng/mL	ng/mL	ng/mL	ng/mL	ng/mL	ng/mL	ng/mL	No Injections	ng/mL	ng/mL	ng/mL	ng/mL	ng/mL	ng/mL	ng/mL	ng/mL	ng/mL	ng/mL	No Injections	ng/mL
		1	P00450	CERU HUMAN RecName Full Ceruloplasmin	31	485568	535264	353888	508992	318874	330368	220192	385024	563894	379712	430752	370368	376832	263520	493248	539616	572928	276576	312448	350141	433696	454368	307680	310624	314208	308672	418336	438854	550752	424256	369024	10	393072	512237	572995	380294	471485	443818	437539	418531	435331	413472	6	490624
		2	P00738	HPT HUMAN RecName Full Haptoglobin	31	1.47443e+06	1.83174e+06	1536064	1058528	362832	1929504	1.08646e+06	1.75434e+06	597888	1295968	732384	1322976	626048	1137984	920192	868416	1.09021e+06	1.3489e+06	1375648	632141	949696	1.31411e+06	964128	1211520	1611712	866624	1.73338e+06	2.15095e+06	1839968	3.22186e+06	1089056	10	1.54135e+06	1.11707e+06	1.42524e+06	1.48528e+06	1.39216e+06	1.42302e+06	1.34105e+06	1.15732e+06	1.28464e+06	1.15076e+06	6	1.16493e+06
		3	P00747	PLMN HUMAN RecName Full Plasminogen	31	225184	320800	218560	204544	288960	223328	208512	273920	180950	185312	160480	182240	215264	194336	237312	222528	162144	245696	253248	257606	181696	285536	127424	180128	231296	178752	260160	316704	304416	223168	300448	10	277382	221376	238013	275962	274858	222624	226310	218563	233866	207091	6	245280
		4	P00751	CFAB HUMAN RecName Full Complement factor B	31	166144	175872	178560	150400	141859	169600	105184	195552	124771	150336	99424	166144	119296	99904	153248	164896	127264	144832	150624	181334	236832	125088	157056	119264	172736	84704	184096	221040	189024	197824	147648	10	176246	129091	166214	175891	153600	147744	148330	137126	145824	140294	6	165920
		5	P01008	ANT3 HUMAN RecName Full Antithrombin III	31	124832	96288	140064	132128	145661	117120	124320	130688	135274	138464	138944	106176	118592	135072	175776	158464	115008	153408	140576	170400	127200	152960	163744	139040	153568	134592	151264	102730	104256	137888	135168	10	146198	132739	142675	141091	147725	141341	145565	124848	131837	119510	6	69536
		6	P01009	A1AT HUMAN RecName Full Alpha 1 antitrypsin	31	1.24806e+06	1683840	1.52144e+06	1589376	1.59407e+06	1683264	1.30016e+06	1510240	1506192	1.09642e+06	1536192	1.57677e+06	1667424	1.40746e+06	1.55363e+06	1436384	1213824	1590112	1283168	2.22276e+06	1568800	2212544	1652320	1342176	1900000	1231424	1059072	2.42291e+06	2653184	2621536	1.76605e+06	10	1.75154e+06	1.26721e+06	2.03599e+06	1.72014e+06	2.10978e+06	1.93414e+06	1.60576e+06	1.70393e+06	1.78852e+06	1.37927e+06	6	913728
		7	P01011	AACT HUMAN RecName Full Alpha 1 antichymotrypsin	31	161152	188704	174624	171680	187248	183040	148992	224928	174086	197504	165920	176064	131296	146752	170016	205440	185024	195456	137120	172598	191200	209120	168704	167072	252992	128768	272544	317558	228384	329888	204288	10	186442	205949	202128	220368	221290	191568	189245	198989	212506	215779	6	170880
		8	P01023	A2MG HUMAN RecName Full Alpha 2 macroglobulin	31	1.35197e+06	2.53584e+06	1401120	2013696	3502128	1809184	1713440	1391456	1.81259e+06	1489024	1.88182e+06	1663552	2480096	3361920	2255584	1.61994e+06	1876288	2257536	1531296	2.54613e+06	1850304	2845888	1206944	1.40883e+06	1824416	1665376	1388160	2.16659e+06	1631136	1450016	1.28614e+06	10	2.09577e+06	2.19839e+06	2.09166e+06	2225472	2.21143e+06	2.01853e+06	1.95541e+06	1.98381e+06	2.12125e+06	2.11679e+06	6	2.10298e+06
		9	P01024	CO3 HUMAN RecName Full Complement C3	31	2370944	2138080	2294784	1511200	1.65924e+06	1893184	1586208	2.05482e+06	1.75621e+06	1.68714e+06	1.46502e+06	1700352	1644832	1.34339e+06	2.08102e+06	1.90896e+06	2.08064e+06	1861344	2256672	2.28039e+06	2758176	2154304	1771616	1.29411e+06	1.81005e+06	1664960	1726400	2350656	2316224	2312768	1811424	10	2.10345e+06	1.76412e+06	1.94557e+06	2.07769e+06	1.90172e+06	1.79743e+06	1.77816e+06	1.753e+06	1.94363e+06	2.04959e+06	6	1969344
		10	P01042	KNG1 HUMAN RecName Full Kininogen 1	31	322400	373952	290368	238048	311510	226048	224096	265600	263702	290176	257248	203968	243168	230656	300448	308864	260512	243072	294016	291504	262400	306848	273248	173152	231200	235488	313344	303072	344640	243552	257728	10	228509	296035	294586	301334	314304	277478	264960	253738	320765	295421	6	259264
		11	P01766	HV305 HUMAN RecName Full Ig heavy chain V III region BRO	31	71872	74208	84480	115072	61689.6	53632	70944	101120	80332.8	38912	86656	118976	66624	104576	87648	92576	90720	159232	81440	66566.4	80096	95680	46944	86400	92192	83584	74496	81120	103168	93536	57248	10	90412.8	81321.6	75974.4	94425.6	83241.6	87974.4	80822.4	82281.6	107462	107952	6	74432
		12	P01834	IGKC HUMAN RecName Full Ig kappa chain C region	31	1174432	1027360	999328	1096576	1.0604e+06	1164992	927680	1.38272e+06	624797	533280	847296	1.2704e+06	983680	1167648	1.01203e+06	1054400	884768	1513792	904512	1.26238e+06	1400864	943040	574176	856928	901632	814432	883968	1.25533e+06	997152	1591904	1107648	10	1.20825e+06	957082	1.17055e+06	1.19046e+06	1.11195e+06	1119168	1.0275e+06	992630	1.06899e+06	1.03742e+06	6	1262240
		13	P01842	LAC HUMAN RecName Full Ig lambda chain C regions	31	354048	289536	358176	534464	438864	488288	338944	441856	340723	228576	300832	493248	461312	349152	505984	429984	362688	514528	399936	615235	554848	345248	287072	224384	371584	282848	393504	512602	399744	536384	441600	10	468931	466042	425798	463613	473165	482669	425664	390278	408970	461578	6	517696
		14	P01857	IGHG1 HUMAN RecName Full Ig gamma 1 chain C region	31	3.63939e+06	2849248	2585376	4533536	5.06884e+06	3439168	3.38794e+06	3694656	2.99532e+06	1616608	2663168	3.85766e+06	3.87987e+06	2.35155e+06	4065824	3703392	3801344	4906784	2119456	5.18931e+06	6.07104e+06	3154656	1.60902e+06	2.03658e+06	2.71482e+06	3087424	3.21965e+06	4.01089e+06	2.70525e+06	4388736	2.66445e+06	10	3.36726e+06	3.48046e+06	3.36971e+06	3.59585e+06	3.17766e+06	3.40317e+06	3.30634e+06	3.15958e+06	3.55871e+06	3.6114e+06	6	4010528
		15	P01859	IGHG2 HUMAN RecName Full Ig gamma 2 chain C region	31	742496	953248	974400	910880	524611	1179904	593216	1184320	667910	286464	823360	1313184	1138432	1.14534e+06	997280	915136	684352	1638784	1055808	374208	708576	811744	742432	814400	967456	825856	461824	1.15188e+06	983680	1947264	1517472	10	1.19199e+06	791443	1.1284e+06	1.06101e+06	951638	944102	946982	844051	919786	821549	6	1071168
		16	P01860	IGHG3 HUMAN RecName Full Ig gamma 3 chain C region	31	182784	368320	136416	435904	166675	596224	377888	246336	309946	214912	171520	340416	272704	101440	614272	440416	135040	646848	170912	461299	400640	241952	212352	86592	241664	184928	104448	321830	442752	455072	484320	10	326717	298301	309293	322493	332707	300490	300691	291398	301882	326822	6	309184
		17	P01861	IGHG4 HUMAN RecName Full Ig gamma 4 chain C region	30		56032	125824	61536	11452.8	227744	43360	225984	38947.2	44960	66144	153824	189088	59776	91840	106112	465216	144576	79136	30796.8	246144	197696	66976	36416	242144	93952	68608	330970	73568	244032	188448	10	112694	129974	128381	123408	132134	106762	124099	107539	134880	131923	6	229696
		IGG	IGG	IGG summed	31	4564672	4226848	3.82202e+06	5941856	5.77158e+06	5.44304e+06	4402400	5.3513e+06	4.01212e+06	2162944	3.72419e+06	5665088	5480096	3.65811e+06	5769216	5165056	5085952	7336992	3.42531e+06	6.05561e+06	7.4264e+06	4406048	2630784	2973984	4166080	4.19216e+06	3854528	5.81556e+06	4205248	7.0351e+06	4854688	10	4.99866e+06	4.70018e+06	4.93578e+06	5.10276e+06	4.59414e+06	4.75452e+06	4.67811e+06	4.40257e+06	4.91526e+06	4.8917e+06	6	5620576
		18	P01871	IGHM HUMAN RecName Full Ig mu chain C region	31	633024	211776	533216	447200	231648	130048	161248	349568	345898	57888	495712	350112	230272	1132576	315584	238528	425696	466880	328576	388973	158496	279328	79872	380224	211840	231648	360032	269251	212064	371488	92544	10	429830	281107	417523	422419	417878	388301	390346	327360	351389	277718	6	489600
		19	P01876	IGHA1 HUMAN RecName Full Ig alpha 1 chain C region	31	604480	353280	697792	335040	484819	416480	646080	1174272	229776	461536	590976	745152	650272	743200	695488	545024	252160	244096	1.0337e+06	1.40085e+06	1.05222e+06	467456	790560	658496	434208	389024	845312	560986	742912	867584	369504	10	752122	611635	685334	677530	680477	648211	634387	612883	657485	612144	6	630912
		20	P01877	IGHA2 HUMAN RecName Full Ig alpha 2 chain C region	27	40576	59648	189824	77472		45376	21952	144448		39456	40512	55296	143520	72800	131936	74272	29472	36800	106976	176237	67840		66816	156544	81760		128768	122275	79648	137088	154304	9		60739.2	95702.4	96240	90384	88723.2	85488	80486.4	81936	67670.4	5	63424
		IGA	IGA	IGA summed	31	645056	412928	887616	412512	484819	461856	668032	1318720	229776	500992	631488	800448	793792	816000	827424	619296	281632	280896	1.14067e+06	1577088	1.12006e+06	467456	857376	815040	515968	389024	974080	683261	822560	1.00467e+06	523808	10	752122	672374	781037	773770	770861	736934	719875	693370	739421	679814	6	694336
		21	P02647	APOA1 HUMAN RecName Full Apolipoprotein A I	31	1808864	1802048	1649888	1670976	1.97994e+06	1.76483e+06	1.38141e+06	1.12461e+06	1518000	1550336	1548320	1118752	1295744	1339616	1420960	1681568	1148000	1.49651e+06	937856	1.6105e+06	1205824	2.06045e+06	1439168	890272	1213152	1677920	1977952	1.53438e+06	1510816	1163808	2.12432e+06	10	1.77379e+06	1.43719e+06	1.60632e+06	1.71378e+06	1.6638e+06	1.56039e+06	1.48578e+06	1.41201e+06	1.48534e+06	1528560	6	1010848
		22	P02652	APOA2 HUMAN RecName Full Apolipoprotein A II	31	333824	283264	214688	148736	289757	282752	255296	191424	171120	203680	180256	150336	208320	257728	191936	240704	132192	196416	196288	280810	101568	222624	216064	133568	146304	188640	281472	196704	285408	168320	308992	10	193315	166128	198038	191683	185722	188112	179904	169718	176083	181363	6	147648
		23	P02749	APOH HUMAN RecName Full Beta 2 glycoprotein 1	31	145440	183680	197376	84800	201754	204704	200320	167072	204499	143072	130592	135648	173952	71520	169888	211072	153856	176416	153216	181267	121888	208256	155392	137184	157184	144704	173440	257962	173216	92384	187360	10	179981	150902	177840	174298	189053	176822	164688	159686	153917	160973	6	203680
		24	P02763	A1AG1 HUMAN RecName Full Alpha 1 acid glycoprotein 1	31	188832	150112	173280	128896	166166	180608	150432	216128	107088	165280	102560	189088	170112	143520	161056	209824	246816	146144	298464	174221	186368	197216	212832	170144	307424	115904	309280	392035	263456	339616	158080	10	223344	177658	220589	229488	230592	216566	222806	189168	207763	176784	6	195616
		25	P02765	FETUA HUMAN RecName Full Alpha 2 HS glycoprotein	31	260288	343552	310784	208800	297130	270528	235776	227776	250214	170656	168352	258016	172384	159040	290336	241376	232512	246144	313920	321936	207392	372736	182176	180384	219136	214048	219520	286464	271648	212320	250848	10	263251	203165	256310	269030	252874	269434	276787	216826	236458	200112	6	190496
		26	P02768	ALBU HUMAN RecName Full Serum albumin	31	61073152	5.64896e+07	55770496	62780576	9.90729e+07	5.61414e+07	6.20508e+07	5.92332e+07	6.57706e+07	54484160	56129376	4.2865e+07	74604064	5.26366e+07	65424160	69755072	48903168	6.54058e+07	6.59551e+07	7.21644e+07	48777280	6.51228e+07	69416320	40744064	55316288	5.72727e+07	67283968	7.02407e+07	51421728	49754816	63029920	10	7.38339e+07	5.38656e+07	6.82682e+07	65762112	6.39596e+07	6.48097e+07	6.03518e+07	5.64651e+07	5.8525e+07	5.60587e+07	6	4.41882e+07
		27	P02774	VTDB HUMAN RecName Full Vitamin D binding protein	31	366912	348768	270784	240800	331786	269440	257952	328320	252557	295168	215968	214752	264736	211712	306496	256832	223552	320416	315168	386707	178976	332704	264576	218944	284384	237280	366560	388656	352160	228000	376992	10	339427	265200	327552	328608	314054	308006	287741	276989	290794	257923	6	378720
		28	P02787	TRFE HUMAN RecName Full Serotransferrin	31	2.81792e+06	2.60429e+06	2425216	2638656	2.64689e+06	2339200	1981824	2881216	1.8338e+06	1952064	2.07795e+06	1801024	1867808	1.71824e+06	1951616	2.6049e+06	2113248	2428352	2.57062e+06	2.9422e+06	1729920	2.29334e+06	2156576	1.73642e+06	1.95235e+06	1607072	2071520	2.52234e+06	2.24883e+06	1944768	2396608	10	2.61916e+06	2.48915e+06	2.55895e+06	2.65217e+06	2.59862e+06	2.3609e+06	2297040	2.15105e+06	2.35864e+06	2.39254e+06	6	2592384
		29	P02790	HEMO HUMAN RecName Full Hemopexin	31	1080384	1066784	950784	787776	930442	955680	789024	982208	833990	869696	765152	696320	683264	790560	712832	886368	905280	811744	828640	957965	915168	1068544	839968	677856	965184	708384	950432	1.12956e+06	1.12134e+06	927776	908032	10	964858	898762	942883	977136	937930	904675	874589	877968	932611	948922	6	860000
		30	P04003	C4BPA HUMAN RecName Full C4b binding protein alpha chain	31	128288	85504	140096	84096	102125	103808	98432	140384	86140.8	102624	82880	108608	91456	89888	313888	128160	104032	77728	106368	96624	90400	109888	97568	87456	125152	84000	111072	149501	100672	140064	133280	10	243091	105888	103776	185462	123168	115930	122909	97075.2	117216	105274	6	112128
		31	P04114	APOB HUMAN RecName Full Apolipoprotein B 100	31	2661504	4779616	1386656	724352	803059	1.23965e+06	1.02918e+06	1627808	1.64954e+06	4247392	3100736	913728	1498016	2.6391e+06	1682048	1274880	1.41802e+06	4.52998e+06	4237952	1.31532e+06	1555712	833376	693120	861216	1462944	1172800	1385408	1789008	1.33872e+06	2460128	1196800	10	1301232	1.05735e+06	3.10579e+06	1.30445e+06	3.61597e+06	1.07553e+06	1.37014e+06	1.64724e+06	1.16172e+06	1386864	6	1177760
		32	P04196	HRG HUMAN RecName Full Histidine rich glycoprotein	31	59616	109504	135584	85824	118666	86624	112032	89824	63926.4	117440	114816	48640	143808	72672	65088	184288	54080	73504	120736	139411	172352	121248	106208	71328	89952	74144	130784	131654	53600	67936	74112	10	108307	80755.2	97056	95251.2	103574	91718.4	90921.6	85017.6	82742.4	84700.8	6	87712
		33	P04217	A1BG HUMAN RecName Full Alpha 1B glycoprotein	31	119200	157184	173312	120896	136618	139424	112704	171072	123696	93696	136928	134784	111008	112576	142912	182240	104736	161952	136256	218438	167456	178752	123392	119136	170720	92256	164768	221098	148288	162592	148672	10	137136	120989	106598	135600	127747	110534	112243	117264	125981	116026	6	130976
		34	P06727	APOA4 HUMAN RecName Full Apolipoprotein A IV	31	94368	103488	158848	106368	161606	104768	158144	89824	119779	87712	103296	50816	107840	87552	126880	131296	55040	894944	101408	122150	579872	94432	151232	39104	100960	169184	81600	98505.6	659424	133216	94720	10	97296	108922	120058	124762	122112	120144	110266	100752	125472	117427	6	62016
		35	P08603	CFAH HUMAN RecName Full Complement factor H	31	353440	293696	335936	207712	239136	306176	217664	298176	268810	264800	212992	252832	251360	208512	324352	271712	270624	230016	347296	325325	390880	280384	268768	229472	287584	271840	316288	341318	370688	291136	245696	10	305501	277536	311251	285216	295891	279629	262272	282470	306826	283498	6	363040
		36	P10909	CLUS HUMAN RecName Full Clusterin	31	151104	166304	155072	117184	163056	138240	125472	154496	112944	121984	140608	98304	120096	143872	155520	140000	855296	158464	135456	164256	148832	193856	143648	94944	147904	120448	1.91686e+06	179750	161728	124224	172000	10	171706	128506	159187	155875	161942	148829	134006	139469	151478	133277	6	142464
		37	P19652	A1AG2 HUMAN RecName Full Alpha 1 acid glycoprotein 2	31	55328	53696	61568	39712	55843.2	49952	51744	68864	46800	46720	37280	59488	59776	43488	55168	66528	36896	76864	41472	49900.8	51072	46944	44864	26112	32896	33728	73920	48556.8	32288	50784	53760	10	52147.2	50572.8	52348.8	43065.6	51686.4	49046.4	48172.8	32553.6	47174.4	50640	6	67360
		38	P19823	ITIH2 HUMAN RecName Full Inter alpha trypsin inhibitor heavy chain H2	31	199808	440352	266176	267328	345005	200032	245024	274720	413578	377568	364832	322432	174624	403584	423872	519104	329152	338016	402848	407194	354208	437792	287872	284224	344256	348320	503648	545251	423200	340544	433536	10	481546	411696	457622	457843	496061	460166	361498	428371	303283	435187	6	207872
		39	P68871	HBB HUMAN RecName Full Hemoglobin subunit beta	31	40992	34112	33184	25632	48144	43360	28608	29504	31353.6	31744	26080	32160	51328	42048	36736	57792	34432	41888	27616	51849.6	28512	39616	38368	31648	40192	38464	47520	53126.4	43616	61536	31520	10	46377.6	40032	42345.6	46195.2	45388.8	42499.2	38870.4	37372.8	43804.8	37718.4	6	66464
		40	Q14624	ITIH4 HUMAN RecName Full Inter alpha trypsin inhibitor heavy chain H4	31	232512	248384	174624	151392	161299	234432	131200	174144	111840	176960	160256	138336	147072	161888	170112	165824	157760	194272	164064	233923	133728	256672	152128	127360	214816	118432	185952	280214	217216	218208	153024	10	169517	177850	183350	201446	188861	169622	176237	155078	185578	181363	6	141568
		41	P00734	THRB HUMAN RecName Full Prothrombin	31	361440	151104	119584	152416	129811	151584	121344	147040	66019.2	160608	99264	98240	142208	118912	79488	158816	125472	152256	166112	138778	243296	129600	108544	119648	126496	115968	122464	171830	172896	137440	160864	10	141946	138115	131462	157968	134534	133603	146189	129936	120490	396154	5	102816
		42	P05155	IC1 HUMAN RecName Full Plasma protease C1	31	122080	143552	127744	90016	127776	127104	126080	137536	93062.4	192768	108160	108864	134304	130368	159104	181248	134208	95040	140736	131059	113824	136128	143200	105056	143232	109408	182784	152602	141440	126496	171552	10	157594	148051	144326	161290	158890	134947	129792	147206	153974	116026	6	107456
		43	P02656	APOC3 HUMAN RecName Full Apolipoprotein C III	31	31904	50816	72704	38432	34060.8	46336	55104	51616	47568	34432	31232	30304	41280	34720	27136	81216	29376	33600	92640	17875.2	12352	41088	36864	23296	36864	38784	75808	48441.6	47584	40096	67136	10	53241.6	39081.6	59654.4	62006.4	48998.4	61132.8	37094.4	43910.4	47712	37929.6	5	26048
		44	P19827	ITIH1 HUMAN RecName Full Inter alpha trypsin inhibitor heavy chain H1	31	217216	210272	169184	159456	212822	190016	146912	273280	170189	127008	150432	158368	147360	156800	208544	238912	111424	170752	157664	275030	151648	180544	200864	216768	191712	161408	278560	246490	177248	187104	211136	10	213408	153110	193056	207053	217411	264365	178291	159859	176458	154906	0
		45	P69905	HBA HUMAN RecName Full Hemoglobin subunit alpha	31	47680	40448	37344	27808	55833.6	55264	37184	27200	36556.8	29664	27360	24512	58624	48640	42656	67296	29376	46752	23584	49238.4	32576	40576	41728	35328	44864	30752	51424	61315.2	44320	80416	36896	10	45648	47529.6	43363.2	51513.6	48825.6	45340.8	42182.4	41817.6	47164.8	45715.2	1
		46	P02671	FIBA HUMAN RecName Full Fibrinogen alpha chain	30	1395008	321248	1228416	1264384	956429	1.2912e+06	893760	1683136	1.08267e+06	614080	684320	986304	654976	597504	841024	711072	1.0536e+06	841280	922240	757171	966400	746592	545120	679840	757312	615680	778848		523424	867776	845504	10	1.09365e+06	870547	980429	1.02786e+06	1.00466e+06	957936	930509	881789	975590	894826	6	414016
		47	P02675	FIBB HUMAN RecName Full Fibrinogen beta chain	30	976128	259488	1.04115e+06	729376	766262	1091840	742880	1394560	861389	476640	547872	675136	546176	456448	735552	531264	788544	684608	734912	684432	665632	652064	457408	577824	596384	485600	703808		429888	724128	785408	10	876269	797482	846499	854995	830122	690902	730138	666682	780173	797155	6	296032
		48	P02679	FIBG HUMAN RecName Full Fibrinogen gamma chain	30	1014432	263584	992992	774464	749904	996480	707904	1368768	804067	493280	536256	692896	511264	464192	716672	583616	715776	691712	744896	598138	673056	616800	409856	516928	628352	497056	625600		436480	721440	738144	10	784973	609043	762307	815222	816883	731318	691219	684653	711254	642403	6	389440
		FIB	FIB	FIB summed	31	3385568	844320	3262560	2768224	2.4726e+06	3.37952e+06	2344544	4446464	2.74812e+06	1584000	1.76845e+06	2354336	1712416	1518144	2.29325e+06	1825952	2.55792e+06	2217600	2.40205e+06	2.03974e+06	2305088	2015456	1412384	1.77459e+06	1982048	1598336	2108256	0	1389792	2313344	2369056	10	2.75489e+06	2277072	2.58924e+06	2698080	2651664	2.38016e+06	2.35187e+06	2.23312e+06	2.46702e+06	2334384	6	1099488
		49	P01019	ANGT HUMAN RecName Full Angiotensinogen	30	154976	168640	65952	38560	67977.6	52256	56384	55904	44726.4	66400	58336	52064	46144	42880		61792	42400	42592	57344	47222.4	38112	75904	57792	44672	57984	42048	74528	78009.6	188000	42464	57408	10	71529.6	66547.2	64550.4	68889.6	64732.8	68803.2	62265.6	61920	65654.4	66192	5	56384
		50	P01764	HV303 HUMAN RecName Full Ig heavy chain V III region VH26	30	36576	31104	32096	49472	37833.6	35296	42464	41984	52022.4	20576	21600	33728	39968	37280	29248	23488	48000	28256	32704	13075.2	16160		25472	22240	51552	23808	45440	54508.8	23008	32160	14112	10	35472	34588.8	32256	32140.8	34531.2	33945.6	32505.6	30806.4	42614.4	44102.4	4	36032
		51	P04433	KV309 HUMAN RecName Full Ig kappa chain V III region VG	29	29472	33120	43936	47008	28176	21024	24992	41952	24460.8	29696	32512	19648	65248	34208	31808	47776	50848	63264	28352	28233.6	38752	34176	40096	31296	35808	35520		66988.8	44256	33920		10	44083.2	26832	43977.6	41184	55564.8	66873.6	25804.8	26592	30000	28598.4	5	21824
		52	P04004	VTNC HUMAN RecName Full Vitronectin AltName Full Serum spreading factor	28	141504	140896	105184	88128		122080	92160	139424	111850	71808		88384		68960	78176	140288	95328	96992	124960	120326	125728	131840	73440	98336	109632	66528	133152	119616	154976	119296	109824	10	130310	92352	121267	131194	124570	114384	115104	104832	118022	106906	6	143808
		53	P02649	APOE HUMAN RecName Full Apolipoprotein E Short Apo E	27	31456	18016	59840	25248		32288	22400	45344	40761.6	25504	22720	38176	42912		14432	33536	19776	44128	40096	35788.8	27264	65856		15968	15968	24576	48416	26707.2		12608	47264	10	33158.4	31392	31286.4	29625.6	33984	31891.2	22569.6	25968	30057.6	30950.4	3	26368
		54	P06312	KV401 HUMAN RecName Full Ig kappa chain V IV region	26	62080		69344	75168	53510.4		54016	28544	58780.8	36224	62368		77792	70784	64512	84672	58976	34688	51744	42144	27008	59584	41600	60704	38464	65504	54176			57472	50208	7	36124.8	42268.8	30249.6	30873.6	33206.4	30115.2			47788.8		6	15328
		55	P02654	APOC1 HUMAN RecName Full Apolipoprotein C I Short Apo CI	26	17440	16384	20000	17440		19360		16096		13248	13856	11680	17696	11616	12672	17216	14208	17696		11414.4		24640	13344	11520	16352	13536	22112	21542.4	12448	14272	21184	9	19180.8		17318.4	17510.4	18259.2	17020.8	16272	15782.4	16156.8	12451.2	0
		56	P02751	FINC HUMAN RecName Full Fibronectin	22	454528		663648	512192	718253	1002048	549952	1070720	1.22076e+06	321056	642752	518848	183552			234656	564160	359264	853792	245866	495840			415808			422304	459552	496576			10	967786	475286	404419	459994	532646	406051	509011	421718	512381	514810	0
		57	P27169	PON1 HUMAN RecName Full Serum paraoxonase arylesterase 1	23	75808	96256	31424	43296	59203.2	56128	38880	23424		56224			54432	51296			24352	34752	50400	48480		54880	51136	14240		61344	53632		51776	31776	77120	7	39964.8	53212.8			57129.6		42076.8	50025.6	27945.6	54643.2	1
		58	P06396	GELS HUMAN RecName Full Gelsolin AltName Full Actin depolymerizing factor	22	66912	55936	62400		61017.6	73280	60480	80416	69705.6	74112			75648		84352	78496		71008		105024		68608		40800	89280	63424	52704	71587.2		48448	71936	9	68649.6	55497.6	69340.8		71913.6	65395.2	51129.6	61296	62486.4	59241.6	2
		59	P02760	AMBP HUMAN RecName Full Protein AMBP	22	47488	34560	34208	40416	45676.8	33536	29888		28108.8	40192		40032	32896	31744		57952		27904	34944	52780.8	32896		37120				60032	58310.4	45792	51648		10	51043.2	47136	41155.2	54192	45436.8	46396.8	43910.4	38976	39993.6	64617.6	5	40512
		60	P05090	APOD HUMAN RecName Full Apolipoprotein D	20		19776	20192	28064	21408	23360	19904		18403.2	16800		14656	22176	19328	24480			22272	11872	31161.6		19680			15808			21187.2		21536	24352	8	24192	17625.6	22540.8		21273.6	22252.8	19363.2		18374.4	16809.6	0
		61	P25311	ZA2G HUMAN RecName Full Zinc alpha 2 glycoprotein	20	1.13955e+06		16512	20416	32860.8		1.45274e+06			59200			29824	18336	33056	1381440	927008		14400	26236.8	969728			32992	1245056	1.34016e+06	22624			1087616	21696	5			18864	19641.6	20016	1.71399e+06		16233.6			5	52416
		62	P02655	APOC2 HUMAN RecName Full Apolipoprotein C II	19		10688	20128			16352	12000	19552	17068.8	12896	9728					20064	11136		34848		5088		11680	11296	15968	11968		20044.8		15840	20640	9	16185.6	14409.6	15964.8	16579.2	14678.4		15417.6	13574.4	15196.8	13881.6	2	6976
		63	P01593	KV101 HUMAN RecName Full Ig kappa chain V I region AG	16	25120		62720		23337.6		19488				49792				21056		14784	29056			39360	20160	13248	7424		14624		28713.6	16640	79232		8	9062.4	16310.4	19526.4		20515.2	20160	57446.4	51340.8	26841.6		4	69056
		64	P43652	AFAM HUMAN RecName Full Afamin	18	74560		58176			32896	48000	57664	70243.2	102080						66720	59744		96576	48844.8		56640	56224	54304		54848	35936		67328	42304		6		52012.8			45955.2	50054.4		49929.6	33235.2	51878.4	6	39552
		65	P0C0L4	CO4A HUMAN RecName Full Complement C4 A	16	680640	612544			549350	625504		497248	473827			455168	542624		410464				651296		564800	616832	638944				586080	749808		712256		4		555802		595814	572294			521482			3	660608
		66	P0C0L5	CO4B HUMAN RecName Full Complement C4 B	15			795744	685664			478304			689856	437632			409440		387776	467264	611392		460723				460352	624448	428960			647552		619488	6	618067		622934			555590	537034		557386	575453	3
		CO4	CO4	CO4 summed	31	680640	612544	795744	685664	549350	625504	478304	497248	473827	689856	437632	455168	542624	409440	410464	387776	467264	611392	651296	460723	564800	616832	638944	460352	624448	428960	586080	749808	647552	712256	619488	10	618067	555802	622934	595814	572294	555590	537034	521482	557386	575453	6	660608
		67	O43866	CD5L HUMAN RecName Full CD5 antigen like	19	100608		35936	25984	25248		12640	21856				24640		65760	20896		32448	30272	24480	30796.8	13120	19008		28224	17504	15936				28000		8	26323.2		20332.8	20592	29318.4	25056		22214.4	20582.4	20054.4	2	21088
		68	P04208	LV106 HUMAN RecName Full Ig lambda chain V I region WAH	15	15456			21600			16256		28118.4		11840	21184	20832		24384	13824	13280	20608	15200		19872					11840		20803.2				4					19104	19123.2			10214.4	14678.4	3	5248
		69	P04207	KV308 HUMAN RecName Full Ig kappa chain V III region CLL	17		24608	27072	25824		19136			18537.6		19904	9408	24736	23392	16256		23360	39968		26755.2					13664			28272	17792	27776		4						21657.6	11433.6	17366.4	20025.6		1
		70	P00739	HPTR HUMAN RecName Full Haptoglobin related protein	16		54272	6016		17587.2	23072				22496		76064					8640	25600		18835.2	12352		15744		17024	24096	62912		32032		32992	9		37161.6	19737.6	26678.4	28636.8	24854.4	33302.4	23424	21571.2	26112	2	33472
		71	P01601	KV109 HUMAN RecName Full Ig kappa chain V I region HK101	15		16320		17664		28896		33728	25545.6			30144	34208	17440		14720			25376	29846.4				26944	23328		26848				26752	2	26784			36192							1
		72	P01617	KV204 HUMAN RecName Full Ig kappa chain V II region TEW	13	50688	43264	49408				32864					21440		59520			42432	61088				54304		42560					37120	51424	38624	3	51696		48096	47596.8							0
		73	P20742	PZP HUMAN RecName Full Pregnancy zone protein	15	50848	186816		34720			34496	35936		57632		49888	28224				35200	122464				36288		22784	114240				43328		32576	5	133603		34137.6			25862.4	106291			32409.6	3	57408
		74	P01621	KV303 HUMAN RecName Full Ig kappa chain V III region NG9 Flags Precursor Fragment	14	15392						16544	27648		26464		27648			31840	28640			12256			15392	9984	16896	19520		17920				33088	3	27244.8	13756.8					30979.2				0
		75	P02753	RET4 HUMAN RecName Full Retinol binding protein 4	14	22976	21440			21744	24832	23392	13824											25120	16579.2		14496	17664	16064			30688		16352		23680	2	16262.4									11001.6	0
		76	P05546	HEP2 HUMAN RecName Full Heparin cofactor 2	11	74240	86144				553088	42720			55936									66176	40396.8		53888		376864					65568		284480	6		350410			52915.2		346051	55920	58358.4	49075.2	1
		77	P06309	KV205 HUMAN RecName Full Ig kappa chain V II region GM607	13					47059.2	35136		52384		14816	41664		42624		44512	33120			39488	38947.2	35648				25504			51052.8				4		37392					42268.8	39139.2	45542.4		1
		Protein identifications in red: not reported in the article. They represent uniprot entries from variable regions or the original sequence stems from case reports of individual patients only.
[truncated: 13 more columns]
