# Supplementary material for: Accuracy and Reproducibility in Quantification of Plasma Protein Concentrations by Mass Spectrometry without the Use of Isotopic Standards
Source: PLoS One. 2015 Oct 16;10(10):e0140097. doi: 10.1371/journal.pone.0140097 (PMC4608811; doi:10.1371/journal.pone.0140097)
Supplement: S3 Table — (XLSX) [file pone.0140097.s007.xlsx]

## Sheet: SupplementalTable 3
	Supplemental Table 3. HI3 peptides in the injections as ranked by PLGS 2.5 : number of injections in which a peptide was detected, variance of peak area and retention time.
	protein.key	protein.Accession	protein.Description	protein.Key_ForHomologs	peptide.modification	peptide.seq	All Injections (61)*	Injections Samples (38)*	Injections AV (10)*	Injections IAV (6)*	Injections IRV (7)*	% CV AV #	% CV IAV #	% CV IRV #	% CV RT samples $	% CV RT AV $	% CVRT IAV $	% CV RT IRV $
	2676	O43866	20 347 CD5L HUMAN RecName Full CD5 antigen like AltName Full SP alpha AltName Full CT 2 AltName		Carbamidomethyl+C(1);Carbamidomethyl+C(11)	CSGEEQSLEQCQHR	13	5	5	1	2	26.9005	-	4.66594	5.69322	3.91941	-	0.144162
	2676	O43866	20 347 CD5L HUMAN RecName Full CD5 antigen like AltName Full SP alpha AltName Full CT 2 AltName		Carbamidomethyl+C(3);Carbamidomethyl+C(13)	NTCNHDEDTWVECEDPFDLR	24	15	2	2	5	21.2118	1.76191	34.8942	0.642891	0.944471	0.246579	1.78705
	2676	O43866	20 347 CD5L HUMAN RecName Full CD5 antigen like AltName Full SP alpha AltName Full CT 2 AltName		Carbamidomethyl+C(4)	ELGCGAASGTPSGILYEPPAEK	27	19	5	0	3	43.9408	-	17.2941	0.732245	5.09621	-	0.781772
	2676	O43866	20 347 CD5L HUMAN RecName Full CD5 antigen like AltName Full SP alpha AltName Full CT 2 AltName		Carbamidomethyl+C(7);Carbamidomethyl+C(17)	FWGFHDCTHQEDVAVICSG	24	15	7	0	2	26.1285	-	36.615	0.724587	0.593658	-	18.4132
	2676	O43866	20 347 CD5L HUMAN RecName Full CD5 antigen like AltName Full SP alpha AltName Full CT 2 AltName		Carbamidomethyl+C(7);Carbamidomethyl+C(20)	GVWGSVCDDNWGEKEDQVVCK	23	13	4	1	5	44.9211	-	22.7278	3.19662	0.888409	-	1.85204
	2676	O43866	20 347 CD5L HUMAN RecName Full CD5 antigen like AltName Full SP alpha AltName Full CT 2 AltName		Carbamidomethyl+C(7)	EATLQDCPSGPWGK	22	13	7	1	1	20.9624	-	-	1.85654	2.97479	-	-
	2676	O43866	20 347 CD5L HUMAN RecName Full CD5 antigen like AltName Full SP alpha AltName Full CT 2 AltName		Carbamidomethyl+C(7)	GQWGTVCDDGWDIK	24	14	7	1	2	38.1613	-	18.3367	0.716846	0.705255	-	0.779737
	2676	O43866	20 347 CD5L HUMAN RecName Full CD5 antigen like AltName Full SP alpha AltName Full CT 2 AltName		Carbamidomethyl+C(8);Carbamidomethyl+C(18);Carbamidomethyl+C(26);Carbamidomethyl+C(36)	VLIQSVSCTGTEDTLAQCEQEEVYDCSHDEDAGASCENPESSFSPVPEGVR	14	5	4	2	3	41.6451	2.32881	36.2475	0.564718	0.519089	0.245398	1.51184
	2676	O43866	20 347 CD5L HUMAN RecName Full CD5 antigen like AltName Full SP alpha AltName Full CT 2 AltName		Carbamidomethyl+C(8)	LVGGDNLCSGR	16	9	3	1	3	40.8403	-	68.1238	1.46829	1.47181	-	12.5505
	2676	O43866	20 347 CD5L HUMAN RecName Full CD5 antigen like AltName Full SP alpha AltName Full CT 2 AltName		None	IWLDNVR	7	6	1	0	0	-	-	-	0.289175		-	-
	protein.key	protein.Accession	IV	protein.Key_ForHomologs	peptide.modification	peptide.seq	All Injections (61)*	Injections Samples (38)*	Injections AV (10)*	Injections IAV (6)*	Injections IRV (7)*	% CV AV #	% CV IAV #	% CV IRV #	% CV RT samples $	% CV RT AV $	% CVRT IAV $	% CV RT IRV $
	1	P00330	0 10 ADH1 YEAST Alcohol dehydrogenase 1 OS Saccharomyces cerevisiae GN ADH1 PE 1 SV 5		None	ANELLINVK	61	38	10	6	6	19.1024	6.8852	23.9642	0.793313	0.855418	0.118317	2.48077
	1	P00330	0 10 ADH1 YEAST Alcohol dehydrogenase 1 OS Saccharomyces cerevisiae GN ADH1 PE 1 SV 5		None	ANGTTVLVGMPAGAK	61	38	10	6	6	13.5705	7.79196	28.0539	0.95001	0.952756	0.148921	2.47857
	1	P00330	0 10 ADH1 YEAST Alcohol dehydrogenase 1 OS Saccharomyces cerevisiae GN ADH1 PE 1 SV 5		None	EALDFFAR	61	38	10	6	6	35.3252	14.0314	15.6004	0.5991	0.632688	0.10585	2.27723
	1	P00330	0 10 ADH1 YEAST Alcohol dehydrogenase 1 OS Saccharomyces cerevisiae GN ADH1 PE 1 SV 5		None	IGDYAGIK	60	37	10	6	6	22.8806	8.42711	25.3355	1.08617	1.20618	0.137794	2.87475
	1	P00330	0 10 ADH1 YEAST Alcohol dehydrogenase 1 OS Saccharomyces cerevisiae GN ADH1 PE 1 SV 5		None	SIGGEVFIDFTK	56	38	5	6	6	14.6022	13.9391	73.2237	0.527808	0.162748	0.110698	2.00683
	1	P00330	0 10 ADH1 YEAST Alcohol dehydrogenase 1 OS Saccharomyces cerevisiae GN ADH1 PE 1 SV 5		None	SISIVGSYVGNR	61	38	10	6	6	21.928	6.09817	18.9507	0.759169	0.794157	0.114786	2.25692
	1	P00330	0 10 ADH1 YEAST Alcohol dehydrogenase 1 OS Saccharomyces cerevisiae GN ADH1 PE 1 SV 5		None	VVGLSTLPEIYEK	61	38	10	6	6	34.8883	13.3933	20.3937	0.55394	0.622734	0.110641	1.89447
	protein.key	protein.Accession	protein.Description	protein.Key_ForHomologs	peptide.modification	peptide.seq	All Injections (61)*	Injections Samples (38)*	Injections AV (10)*	Injections IAV (6)*	Injections IRV (7)*	% CV AV #	% CV IAV #	% CV IRV #	% CV RT samples $	% CV RT AV $	% CVRT IAV $	% CV RT IRV $
	2877	P00450	20 1065 CERU HUMAN RecName Full Ceruloplasmin EC 1 16 3 1 AltName Full Ferroxidase Flags Precurso		Carbamidomethyl+C(11)	EVGPTNADPVCLAK	58	37	10	5	5	13.7417	46.0831	69.6574	4.96024	0.938761	0.629081	2.19875
	2877	P00450	20 1065 CERU HUMAN RecName Full Ceruloplasmin EC 1 16 3 1 AltName Full Ferroxidase Flags Precurso		Carbamidomethyl+C(13)	DIASGLIGPLIICK	59	36	10	6	6	24.2097	7.80154	27.1385	0.459832	0.481343	0.0900716	1.54342
	2877	P00450	20 1065 CERU HUMAN RecName Full Ceruloplasmin EC 1 16 3 1 AltName Full Ferroxidase Flags Precurso		Carbamidomethyl+C(13)	DLYSGLIGPLIVCR	59	36	10	6	6	28.9386	10.8296	31.467	0.416537	0.436965	0.075144	1.40789
	2877	P00450	20 1065 CERU HUMAN RecName Full Ceruloplasmin EC 1 16 3 1 AltName Full Ferroxidase Flags Precurso		Carbamidomethyl+C(9)	TPGIWLLHCHVTDHIHAGMETTYTVLQNEDTK	36	24	9	1	2	58.6132	-	3.46835	3.07284	0.527865	-	1.9564
	2877	P00450	20 1065 CERU HUMAN RecName Full Ceruloplasmin EC 1 16 3 1 AltName Full Ferroxidase Flags Precurso		None	EYTDASFTNR	56	33	10	6	6	36.7873	3.95311	41.4356	7.84269	7.47008	0.14968	2.41643
	2877	P00450	20 1065 CERU HUMAN RecName Full Ceruloplasmin EC 1 16 3 1 AltName Full Ferroxidase Flags Precurso		None	GAYPLSIEPIGVR	61	38	10	6	6	35.6108	5.07764	32.0794	0.593183	0.644475	0.105318	2.10469
	2877	P00450	20 1065 CERU HUMAN RecName Full Ceruloplasmin EC 1 16 3 1 AltName Full Ferroxidase Flags Precurso		None	LISVDTEHSNIYLQNGPDR	42	25	8	3	5	16.5825	9.32655	16.9544	0.770426	0.775625	0.0853633	2.09145
	2877	P00450	20 1065 CERU HUMAN RecName Full Ceruloplasmin EC 1 16 3 1 AltName Full Ferroxidase Flags Precurso		None	MFTTAPDQVDKEDEDFQESNK	61	38	10	6	6	12.941	15.3152	40.7282	0.839125	0.841126	0.207537	2.04721
	2877	P00450	20 1065 CERU HUMAN RecName Full Ceruloplasmin EC 1 16 3 1 AltName Full Ferroxidase Flags Precurso		None	SVPPSASHVAPTETFTYEWTVPK	53	34	8	4	6	77.2046	7.62889	28.4884	3.64083	0.799165	0.0913946	2.35525
	2877	P00450	20 1065 CERU HUMAN RecName Full Ceruloplasmin EC 1 16 3 1 AltName Full Ferroxidase Flags Precurso		None	TTIEKPVWLGFLGPIIK	57	34	10	6	6	27.0048	13.198	15.9899	0.383878	0.432355	0.323059	2.1789
	2877	P00450	20 1065 CERU HUMAN RecName Full Ceruloplasmin EC 1 16 3 1 AltName Full Ferroxidase Flags Precurso		None	VNKDDEEFIESNK	61	38	10	6	6	24.4278	7.00293	40.744	1.26863	1.22708	0.115174	2.7399
	protein.key	protein.Accession	protein.Description	protein.Key_ForHomologs	peptide.modification	peptide.seq	All Injections (61)*	Injections Samples (38)*	Injections AV (10)*	Injections IAV (6)*	Injections IRV (7)*	% CV AV #	% CV IAV #	% CV IRV #	% CV RT samples $	% CV RT AV $	% CVRT IAV $	% CV RT IRV $
	17361	P00734	25 622 THRB HUMAN RecName Full Prothrombin EC 3 4 21 5 AltName Full Coagulation factor II Contains		Carbamidomethyl+C(10)	LAVTTHGLPCLAWASAQAK	39	24	6	3	5	55.8843	11.1685	39.3101	0.616324	0.587369	0.168637	2.16265
	17361	P00734	25 622 THRB HUMAN RecName Full Prothrombin EC 3 4 21 5 AltName Full Coagulation factor II Contains		Carbamidomethyl+C(11)	NPDSSTTGPWCYTTDPTVR	47	29	9	3	6	49.3843	5.50483	32.9729	0.964964	1.22096	0.0635152	1.86378
	17361	P00734	25 622 THRB HUMAN RecName Full Prothrombin EC 3 4 21 5 AltName Full Coagulation factor II Contains		Carbamidomethyl+C(15)	HQDFNSAVQLVENFCR	50	35	9	1	4	25.2156	-	109.662	0.503574	0.624969	-	2.40559
	17361	P00734	25 622 THRB HUMAN RecName Full Prothrombin EC 3 4 21 5 AltName Full Coagulation factor II Contains		Carbamidomethyl+C(15)	SEGSSVNLSPPLEQCVPDR	39	21	10	3	4	25.8283	6.50496	27.7033	11.8522	0.731742	0.0640011	1.64217
	17361	P00734	25 622 THRB HUMAN RecName Full Prothrombin EC 3 4 21 5 AltName Full Coagulation factor II Contains		Carbamidomethyl+C(19)	GQPSVLQVVNLPIVERPVCK	43	27	7	3	5	20.048	3.56131	19.9352	0.645824	0.426342	0.122864	1.84224
	17361	P00734	25 622 THRB HUMAN RecName Full Prothrombin EC 3 4 21 5 AltName Full Coagulation factor II Contains		Carbamidomethyl+C(4);Carbamidomethyl+C(9)	LAACLEGNCAEGLGTNYR	38	22	6	4	5	45.3554	53.1837	23.0935	22.3221	19.1564	2.70683	1.88924
	17361	P00734	25 622 THRB HUMAN RecName Full Prothrombin EC 3 4 21 5 AltName Full Coagulation factor II Contains		Carbamidomethyl+C(5)	SGIECQLWR	14	6	3	1	3	22.4083	-	13.2664	4.72748	6.35288	-	2.24551
	17361	P00734	25 622 THRB HUMAN RecName Full Prothrombin EC 3 4 21 5 AltName Full Coagulation factor II Contains		Carbamidomethyl+C(7)	SPQELLCGASLISDR	37	21	9	2	4	52.6854	4.80605	24.2694	5.93225	8.67482	0.0470861	2.0995
	17361	P00734	25 622 THRB HUMAN RecName Full Prothrombin EC 3 4 21 5 AltName Full Coagulation factor II Contains		Carbamidomethyl+C(9)	TFGSGEADCGLRPLFEK	47	32	6	3	5	26.4095	11.6013	18.9158	0.66085	0.515391	0.0165593	2.21484
	17361	P00734	25 622 THRB HUMAN RecName Full Prothrombin EC 3 4 21 5 AltName Full Coagulation factor II Contains		Carbamidomethyl+C(9)	TFGSGEADCGLRPLFEKK	1	0	0	1	0	-	-	-	-		-	-
	17361	P00734	25 622 THRB HUMAN RecName Full Prothrombin EC 3 4 21 5 AltName Full Coagulation factor II Contains		None	ELLESYIDGR	41	28	7	2	4	34.2609	1.49674	24.2414	0.544696	0.727699	0.0882182	2.29795
	17361	P00734	25 622 THRB HUMAN RecName Full Prothrombin EC 3 4 21 5 AltName Full Coagulation factor II Contains		None	ETAASLLQAGYK	39	29	10	0	0	32.4428	-	-	0.788208	0.818223	-	-
	17361	P00734	25 622 THRB HUMAN RecName Full Prothrombin EC 3 4 21 5 AltName Full Coagulation factor II Contains		None	TATSEYQTFFNPR	38	25	7	0	5	32.1479	-	17.8463	1.96545	0.737715	-	2.24641
	17361	P00734	25 622 THRB HUMAN RecName Full Prothrombin EC 3 4 21 5 AltName Full Coagulation factor II Contains		None	VTGWGNLK	31	22	8	0	1	17.1894	-	-	1.06029	0.873867	-	-
	protein.key	protein.Accession	protein.Description	protein.Key_ForHomologs	peptide.modification	peptide.seq	All Injections (61)*	Injections Samples (38)*	Injections AV (10)*	Injections IAV (6)*	Injections IRV (7)*	% CV AV #	% CV IAV #	% CV IRV #	% CV RT samples $	% CV RT AV $	% CVRT IAV $	% CV RT IRV $
	8010	P00738	19 406 HPT HUMAN RecName Full Haptoglobin Contains RecName Full Haptoglobin alpha chain Contains R		Carbamidomethyl+C(12)	YVMLPVADQDQCIR	61	38	10	6	6	29.4495	11.8496	40.2244	0.700408	0.727445	0.110322	2.12833
	8010	P00738	19 406 HPT HUMAN RecName Full Haptoglobin Contains RecName Full Haptoglobin alpha chain Contains R		Carbamidomethyl+C(15)	SPVGVQPILNEHTFCAGMSK	60	37	10	6	6	39.2535	13.4236	37.3557	0.615377	0.718057	0.105999	2.37952
	8010	P00738	19 406 HPT HUMAN RecName Full Haptoglobin Contains RecName Full Haptoglobin alpha chain Contains R		Carbamidomethyl+C(15)	VDSGNDVTDIADDGCPKPPEIAHGYVEHSVR	61	38	10	6	6	20.4567	31.3754	38.904	0.771775	0.812976	0.956434	2.85987
	8010	P00738	19 406 HPT HUMAN RecName Full Haptoglobin Contains RecName Full Haptoglobin alpha chain Contains R		Carbamidomethyl+C(2)	SCAVAEYGVYVK	26	19	1	4	1	-	17.2079	-	0.865554		0.0578715	0.226222
	8010	P00738	19 406 HPT HUMAN RecName Full Haptoglobin Contains RecName Full Haptoglobin alpha chain Contains R		Carbamidomethyl+C(4);Carbamidomethyl+C(10)	LPECEADDGCPKPPEIAHGYVEHSVR	50	29	10	5	5	17.2323	56.8299	75.119	1.05401	0.982226	1.4236	4.46699
	8010	P00738	19 406 HPT HUMAN RecName Full Haptoglobin Contains RecName Full Haptoglobin alpha chain Contains R		None	DIAPTLTLYVGK	26	19	1	4	1	-	5.11422	-	0.636257		0.113487	0.22274
	8010	P00738	19 406 HPT HUMAN RecName Full Haptoglobin Contains RecName Full Haptoglobin alpha chain Contains R		None	VTSIQDWVQK	25	19	1	4	1	-	2.40006	-	0.756001		0.122368	-
	8010	P00738	19 406 HPT HUMAN RecName Full Haptoglobin Contains RecName Full Haptoglobin alpha chain Contains R	8009	Carbamidomethyl+C(2)	SCAVAEYGVYVK	35	19	9	2	5	16.9252	3.62544	33.2293	0.877044	0.767756	0.249171	0.880576
	8010	P00738	19 406 HPT HUMAN RecName Full Haptoglobin Contains RecName Full Haptoglobin alpha chain Contains R	8009	Carbamidomethyl+C(5)	VMPICLPSK	32	19	9	2	2	28.6572	5.6827	4.58987	0.793494	0.731775	0.0858248	-
	8010	P00738	19 406 HPT HUMAN RecName Full Haptoglobin Contains RecName Full Haptoglobin alpha chain Contains R	8009	None	DIAPTLTLYVGK	35	19	9	2	5	20.6461	10.2098	21.2211	0.483338	0.523538	0.117656	0.535524
	8010	P00738	19 406 HPT HUMAN RecName Full Haptoglobin Contains RecName Full Haptoglobin alpha chain Contains R	8009	None	VTSIQDWVQK	33	19	9	2	3	23.4572	25.4834	33.2268	0.691577	0.643223	0.0863369	0.834834
	protein.key	protein.Accession	protein.Description	protein.Key_ForHomologs	peptide.modification	peptide.seq	All Injections (61)*	Injections Samples (38)*	Injections AV (10)*	Injections IAV (6)*	Injections IRV (7)*	% CV AV #	% CV IAV #	% CV IRV #	% CV RT samples $	% CV RT AV $	% CVRT IAV $	% CV RT IRV $
	8009	P00739	20 348 HPTR HUMAN RecName Full Haptoglobin related protein Flags Precursor	8010	Carbamidomethyl+C(2)	SCAVAEYGVYVK	35	19	9	2	5	40.684	3.14614	39.1498	0.877044	0.767756	0.249171	0.880576
	8009	P00739	20 348 HPTR HUMAN RecName Full Haptoglobin related protein Flags Precursor	8010	Carbamidomethyl+C(5)	VMPICLPSK	32	19	9	2	2	57.6835	1.08706	17.6994	0.793494	0.731775	0.0858248	-
	8009	P00739	20 348 HPTR HUMAN RecName Full Haptoglobin related protein Flags Precursor	8010	None	DIAPTLTLYVGK	35	19	9	2	5	46.7922	3.45394	29.3211	0.483338	0.523538	0.117656	0.535524
	8009	P00739	20 348 HPTR HUMAN RecName Full Haptoglobin related protein Flags Precursor	8010	None	GSFPWQAK	35	19	9	2	5	43.2128	8.56903	33.9315	0.768826	0.700192	0.434529	0.76073
	8009	P00739	20 348 HPTR HUMAN RecName Full Haptoglobin related protein Flags Precursor	8010	None	TEGDGVYTLNDK	35	19	9	2	5	41.0143	2.2642	37.8211	1.09929	0.880267	0.164444	0.807778
	8009	P00739	20 348 HPTR HUMAN RecName Full Haptoglobin related protein Flags Precursor	8010	None	VTSIQDWVQK	33	19	9	2	3	51.4103	18.8784	4.45929	0.691577	0.643223	0.0863369	0.834834
	protein.key	protein.Accession	protein.Description	protein.Key_ForHomologs	peptide.modification	peptide.seq	All Injections (61)*	Injections Samples (38)*	Injections AV (10)*	Injections IAV (6)*	Injections IRV (7)*	% CV AV #	% CV IAV #	% CV IRV #	% CV RT samples $	% CV RT AV $	% CVRT IAV $	% CV RT IRV $
	13430	P00747	20 810 PLMN HUMAN RecName Full Plasminogen EC 3 4 21 7 Contains RecName Full Plasmin heavy chain A		Carbamidomethyl+C(11)	NPDGDVGGPWCYTTNPR	55	34	9	5	6	19.0615	6.46951	52.0056	3.31928	2.10881	0.103885	2.22948
	13430	P00747	20 810 PLMN HUMAN RecName Full Plasminogen EC 3 4 21 7 Contains RecName Full Plasmin heavy chain A		Carbamidomethyl+C(16)	FSPATHPSEGLEENYCR	58	37	10	5	5	16.3602	42.3249	35.9864	0.98733	0.989282	0.212551	2.39257
	13430	P00747	20 810 PLMN HUMAN RecName Full Plasminogen EC 3 4 21 7 Contains RecName Full Plasmin heavy chain A		Carbamidomethyl+C(4)	WELCDIPR	31	14	6	6	5	37.2738	11.4342	27.7862	0.665944	0.815752	0.378289	2.03351
	13430	P00747	20 810 PLMN HUMAN RecName Full Plasminogen EC 3 4 21 7 Contains RecName Full Plasmin heavy chain A		Carbamidomethyl+C(5);Carbamidomethyl+C(10);Carbamidomethyl+C(17)	LYDYCDVPQCAAPSFDCGKPQVEPK	55	38	9	4	4	24.7805	19.8303	26.3136	5.39551	0.754159	0.0676027	1.75359
	13430	P00747	20 810 PLMN HUMAN RecName Full Plasminogen EC 3 4 21 7 Contains RecName Full Plasmin heavy chain A		Carbamidomethyl+C(7);Carbamidomethyl+C(18);Carbamidomethyl+C(28)	VQSTELCAGHLAGGTDSCQGDSGGPLVCFEK	43	29	8	0	5	28.7177	-	20.2231	0.714246	0.599725	-	2.0396
	13430	P00747	20 810 PLMN HUMAN RecName Full Plasminogen EC 3 4 21 7 Contains RecName Full Plasmin heavy chain A		Carbamidomethyl+C(9)	ATTVTGTPCQDWAAQEPHR	37	19	5	6	6	8.36944	6.95832	35.7139	1.03289	0.840351	0.220269	2.50527
	13430	P00747	20 810 PLMN HUMAN RecName Full Plasminogen EC 3 4 21 7 Contains RecName Full Plasmin heavy chain A		None	EPLDDYVNTQGASLFSVTK	45	32	10	0	3	39.1167	-	81.0769	1.06921	1.56554	-	0.00940649
	13430	P00747	20 810 PLMN HUMAN RecName Full Plasminogen EC 3 4 21 7 Contains RecName Full Plasmin heavy chain A		None	VILGAHQEVNLEPHVQEIEVSR	61	38	10	6	6	30.8194	37.2914	36.7285	0.683836	0.745116	3.3718	1.90351
	protein.key	protein.Accession	protein.Description	protein.Key_ForHomologs	peptide.modification	peptide.seq	All Injections (61)*	Injections Samples (38)*	Injections AV (10)*	Injections IAV (6)*	Injections IRV (7)*	% CV AV #	% CV IAV #	% CV IRV #	% CV RT samples $	% CV RT AV $	% CVRT IAV $	% CV RT IRV $
	2963	P00751	26 764 CFAB HUMAN RecName Full Complement factor B EC 3 4 21 47 AltName Full C3 C5 convertase AltN		Carbamidomethyl+C(12)	LLQEGQALEYVCPSGFYPYPVQTR	56	38	10	1	6	21.296	-	48.8411	0.46686	0.491532	-	1.45952
	2963	P00751	26 764 CFAB HUMAN RecName Full Complement factor B EC 3 4 21 47 AltName Full C3 C5 convertase AltN		Carbamidomethyl+C(3);Carbamidomethyl+C(16)	FLCTGGVSPYADPNTCR	57	35	10	6	5	18.8639	7.63797	32.5883	3.2763	0.766664	0.405133	1.84078
	2963	P00751	26 764 CFAB HUMAN RecName Full Complement factor B EC 3 4 21 47 AltName Full C3 C5 convertase AltN		Carbamidomethyl+C(5);Carbamidomethyl+C(21)	GHESCMGAVVSEYFVLTAAHCFTVDDK	8	4	2	1	1	80.0108	-	-	10.6102	1.66301	-	-
	2963	P00751	26 764 CFAB HUMAN RecName Full Complement factor B EC 3 4 21 47 AltName Full C3 C5 convertase AltN		Carbamidomethyl+C(9);Carbamidomethyl+C(12)	YGQTIRPICLPCTEGTTR	25	14	2	3	6	7.15745	3.12884	42.059	0.714139	0.515765	0.153488	2.1525
	2963	P00751	26 764 CFAB HUMAN RecName Full Complement factor B EC 3 4 21 47 AltName Full C3 C5 convertase AltN		Carbamidomethyl+C(9)	LEDSVTYHCSR	53	31	10	6	5	26.8855	6.16054	50.3858	1.55941	1.33591	0.159639	2.96091
	2963	P00751	26 764 CFAB HUMAN RecName Full Complement factor B EC 3 4 21 47 AltName Full C3 C5 convertase AltN		None	DISEVVTPR	27	21	5	1	0	20.7092	-	-	0.69316	0.258216	-	-
	2963	P00751	26 764 CFAB HUMAN RecName Full Complement factor B EC 3 4 21 47 AltName Full C3 C5 convertase AltN		None	DNEQHVFK	7	3	1	0	3	-	-	36.3787	1.20394		-	1.61858
	2963	P00751	26 764 CFAB HUMAN RecName Full Complement factor B EC 3 4 21 47 AltName Full C3 C5 convertase AltN		None	EAGIPEFYDYDVALIK	55	35	10	5	5	27.2649	5.76041	25.8822	0.368903	0.475926	0.106915	1.67274
	2963	P00751	26 764 CFAB HUMAN RecName Full Complement factor B EC 3 4 21 47 AltName Full C3 C5 convertase AltN		None	QLNEINYEDHK	32	19	4	4	4	15.8764	7.72109	27.5144	13.1353	1.21158	0.146259	2.57429
	2963	P00751	26 764 CFAB HUMAN RecName Full Complement factor B EC 3 4 21 47 AltName Full C3 C5 convertase AltN		None	STGSWSTLK	21	10	6	3	2	27.9579	8.58374	28.2308	1.58716	5.86335	0.0457207	0.103282
	2963	P00751	26 764 CFAB HUMAN RecName Full Complement factor B EC 3 4 21 47 AltName Full C3 C5 convertase AltN		None	VSEADSSNADWVTK	56	35	8	6	6	17.5117	6.11215	43.4182	23.6117	0.940821	0.181821	2.52985
	2963	P00751	26 764 CFAB HUMAN RecName Full Complement factor B EC 3 4 21 47 AltName Full C3 C5 convertase AltN		None	YGLVTYATYPK	23	12	3	6	2	41.0377	6.2743	1.6177	0.743042	11.928	0.11356	-
	protein.key	protein.Accession	protein.Description	protein.Key_ForHomologs	peptide.modification	peptide.seq	All Injections (61)*	Injections Samples (38)*	Injections AV (10)*	Injections IAV (6)*	Injections IRV (7)*	% CV AV #	% CV IAV #	% CV IRV #	% CV RT samples $	% CV RT AV $	% CVRT IAV $	% CV RT IRV $
	865	P01008	33 464 ANT3 HUMAN RecName Full Antithrombin III Short ATIII Flags Precursor		Carbamidomethyl+C(6)	ADGESCSASMMYQEGK	31	19	5	5	2	16.4998	12.8123	81.9919	0.937421	0.582397	0.179896	-
	865	P01008	33 464 ANT3 HUMAN RecName Full Antithrombin III Short ATIII Flags Precursor		Carbamidomethyl+C(8)	HGSPVDICTAKPR	12	1	0	4	6	-	16.0784	48.5707	-		0.0643292	3.00762
	865	P01008	33 464 ANT3 HUMAN RecName Full Antithrombin III Short ATIII Flags Precursor		None	AFLEVNEEGSEAAASTAVVIAGR	51	38	10	2	1	26.8234	5.75487	-	0.53462	0.589193	0.0110853	-
	865	P01008	33 464 ANT3 HUMAN RecName Full Antithrombin III Short ATIII Flags Precursor		None	DDLYVSDAFHK	49	37	10	2	0	20.918	2.52913	-	0.909535	0.890395	0.167801	-
	865	P01008	33 464 ANT3 HUMAN RecName Full Antithrombin III Short ATIII Flags Precursor		None	EQLQDMGLVDLFSPEK	55	35	9	4	6	23.2512	10.5631	36.673	0.419228	0.403949	0.104184	1.67766
	865	P01008	33 464 ANT3 HUMAN RecName Full Antithrombin III Short ATIII Flags Precursor		None	EVPLNTIIFMGR	51	33	10	5	3	23.9714	9.40129	15.7515	0.49849	0.535917	0.0693482	0.341406
	865	P01008	33 464 ANT3 HUMAN RecName Full Antithrombin III Short ATIII Flags Precursor		None	FATTFYQHLADSK	44	31	10	0	2	22.896	-	1.414	2.1825	0.811855	-	3.19514
	865	P01008	33 464 ANT3 HUMAN RecName Full Antithrombin III Short ATIII Flags Precursor		None	GDDITMVLILPKPEK	49	38	10	0	1	18.5487	-	-	0.553213	0.617891	-	-
	865	P01008	33 464 ANT3 HUMAN RecName Full Antithrombin III Short ATIII Flags Precursor		None	TSDQIHFFFAK	52	33	9	4	5	44.6771	24.7172	43.1285	4.39019	9.60461	9.71732	1.92613
	865	P01008	33 464 ANT3 HUMAN RecName Full Antithrombin III Short ATIII Flags Precursor		None	VAEGTQVLELPFK	61	38	10	6	6	30.0125	15.5197	20.5824	0.551336	0.607159	0.10865	1.97471
	protein.key	protein.Accession	protein.Description	protein.Key_ForHomologs	peptide.modification	peptide.seq	All Injections (61)*	Injections Samples (38)*	Injections AV (10)*	Injections IAV (6)*	Injections IRV (7)*	% CV AV #	% CV IAV #	% CV IRV #	% CV RT samples $	% CV RT AV $	% CVRT IAV $	% CV RT IRV $
	159	P01009	25 418 A1AT HUMAN RecName Full Alpha 1 antitrypsin AltName Full Alpha 1 protease inhibitor AltName		None	DTEEEDFHVDQVTTVK	59	36	10	6	6	14.3493	7.77047	28.6753	0.838801	0.85544	0.190776	2.10667
	159	P01009	25 418 A1AT HUMAN RecName Full Alpha 1 antitrypsin AltName Full Alpha 1 protease inhibitor AltName		None	FLENEDR	40	32	8	0	0	29.232	-	-	1.55472	1.54888	-	-
	159	P01009	25 418 A1AT HUMAN RecName Full Alpha 1 antitrypsin AltName Full Alpha 1 protease inhibitor AltName		None	LQHLENELTHDIITK	61	38	10	6	6	18.4228	12.0021	66.8125	0.793037	0.85938	0.45668	3.19495
	159	P01009	25 418 A1AT HUMAN RecName Full Alpha 1 antitrypsin AltName Full Alpha 1 protease inhibitor AltName		None	LSITGTYDLK	61	38	10	6	6	26.2947	3.59393	26.6306	0.725825	0.77979	0.112266	2.24935
	159	P01009	25 418 A1AT HUMAN RecName Full Alpha 1 antitrypsin AltName Full Alpha 1 protease inhibitor AltName		None	SVLGQLGITK	61	38	10	6	6	34.9384	6.21739	24.6775	0.675974	0.705408	0.105693	2.16092
	159	P01009	25 418 A1AT HUMAN RecName Full Alpha 1 antitrypsin AltName Full Alpha 1 protease inhibitor AltName		None	TDTSHHDQDHPTFNK	57	38	9	3	6	29.2304	36.2169	81.0885	2.27417	2.0995	1.47273	3.79265
	159	P01009	25 418 A1AT HUMAN RecName Full Alpha 1 antitrypsin AltName Full Alpha 1 protease inhibitor AltName		None	VFSNGADLSGVTEEAPLK	61	38	10	6	6	34.3319	8.54982	37.2455	0.661342	0.712809	0.118926	1.79966
	protein.key	protein.Accession	protein.Description	protein.Key_ForHomologs	peptide.modification	peptide.seq	All Injections (61)*	Injections Samples (38)*	Injections AV (10)*	Injections IAV (6)*	Injections IRV (7)*	% CV AV #	% CV IAV #	% CV IRV #	% CV RT samples $	% CV RT AV $	% CVRT IAV $	% CV RT IRV $
	186	P01011	24 423 AACT HUMAN RecName Full Alpha 1 antichymotrypsin Short ACT AltName Full Cell growth inhibit		Carbamidomethyl+C(6)	DEELSCTVVELK	53	36	9	4	4	31.3314	81.3211	8.40823	0.665816	0.644886	0.240985	2.53082
	186	P01011	24 423 AACT HUMAN RecName Full Alpha 1 antichymotrypsin Short ACT AltName Full Cell growth inhibit		None	AVLDVFEEGTEASAATAVK	61	38	10	6	6	32.9518	45.693	52.9993	0.556382	0.585805	0.106564	1.75207
	186	P01011	24 423 AACT HUMAN RecName Full Alpha 1 antichymotrypsin Short ACT AltName Full Cell growth inhibit		None	EIGELYLPK	59	36	10	6	6	40.2689	7.60457	35.7249	0.692465	0.720517	0.111145	2.24335
	186	P01011	24 423 AACT HUMAN RecName Full Alpha 1 antichymotrypsin Short ACT AltName Full Cell growth inhibit		None	HPNSPLDEENLTQENQDR	57	37	10	4	5	14.087	12.0188	25.9879	1.00096	0.997678	0.0974425	2.35056
	186	P01011	24 423 AACT HUMAN RecName Full Alpha 1 antichymotrypsin Short ACT AltName Full Cell growth inhibit		None	ITLLSALVETR	61	38	10	6	6	19.1714	12.7658	31.941	0.460713	0.635992	0.0943113	1.85354
	186	P01011	24 423 AACT HUMAN RecName Full Alpha 1 antichymotrypsin Short ACT AltName Full Cell growth inhibit		None	LYGSEAFATDFQDSAAAK	55	32	10	6	6	45.0064	13.3201	53.1725	0.585915	0.599522	0.1114	1.86025
	186	P01011	24 423 AACT HUMAN RecName Full Alpha 1 antichymotrypsin Short ACT AltName Full Cell growth inhibit		None	NLAVSQVVHK	61	38	10	6	6	19.4988	8.33113	38.6518	1.36553	1.28113	0.12925	2.60775
	186	P01011	24 423 AACT HUMAN RecName Full Alpha 1 antichymotrypsin Short ACT AltName Full Cell growth inhibit		None	WEMPFDPQDTHQSR	58	36	10	6	5	30.6716	18.1299	33.9213	0.67947	0.728861	0.0990444	2.33184
	protein.key	protein.Accession	protein.Description	protein.Key_ForHomologs	peptide.modification	peptide.seq	All Injections (61)*	Injections Samples (38)*	Injections AV (10)*	Injections IAV (6)*	Injections IRV (7)*	% CV AV #	% CV IAV #	% CV IRV #	% CV RT samples $	% CV RT AV $	% CVRT IAV $	% CV RT IRV $
	781	P01019	34 485 ANGT HUMAN RecName Full Angiotensinogen AltName Full Serpin A8 Contains RecName Full Angio		None	ADSQAQLLLSTVVGVFTAPGLHLK	8	1	0	4	3	-	10.0706	53.0215	-		0.0107929	3.06654
	781	P01019	34 485 ANGT HUMAN RecName Full Angiotensinogen AltName Full Serpin A8 Contains RecName Full Angio		None	ALQDQLVLVAAK	56	35	10	5	5	23.9714	8.00934	20.1972	0.672843	0.726542	0.0661372	2.06229
	781	P01019	34 485 ANGT HUMAN RecName Full Angiotensinogen AltName Full Serpin A8 Contains RecName Full Angio		None	DPTFIPAPIQAK	48	27	10	5	5	33.3456	7.91157	34.7642	0.573036	0.749015	0.050524	2.11188
	781	P01019	34 485 ANGT HUMAN RecName Full Angiotensinogen AltName Full Serpin A8 Contains RecName Full Angio		None	FMQAVTGWK	14	12	2	0	0	31.4017	-	-	7.94078	8.75301	-	-
	781	P01019	34 485 ANGT HUMAN RecName Full Angiotensinogen AltName Full Serpin A8 Contains RecName Full Angio		None	LQAILGVPWK	29	21	8	0	0	27.6889	-	-	0.464563	0.581436	-	-
	781	P01019	34 485 ANGT HUMAN RecName Full Angiotensinogen AltName Full Serpin A8 Contains RecName Full Angio		None	QPFVQGLALYTPVVLPR	16	4	1	5	5	-	6.09438	52.599	0.543937		0.079936	1.68047
	781	P01019	34 485 ANGT HUMAN RecName Full Angiotensinogen AltName Full Serpin A8 Contains RecName Full Angio		None	SLDFTELDVAAEK	52	34	10	4	3	36.606	8.98196	41.7108	0.578552	0.610625	0.0733867	1.69422
	781	P01019	34 485 ANGT HUMAN RecName Full Angiotensinogen AltName Full Serpin A8 Contains RecName Full Angio		None	VLSALQAVQGLLVAQGR	50	36	10	2	2	14.204	4.88991	37.4201	0.402985	0.423528	0.0671059	1.94038
	protein.key	protein.Accession	protein.Description	protein.Key_ForHomologs	peptide.modification	peptide.seq	All Injections (61)*	Injections Samples (38)*	Injections AV (10)*	Injections IAV (6)*	Injections IRV (7)*	% CV AV #	% CV IAV #	% CV IRV #	% CV RT samples $	% CV RT AV $	% CVRT IAV $	% CV RT IRV $
	171	P01023	24 1474 A2MG HUMAN RecName Full Alpha 2 macroglobulin Short Alpha 2 M AltName Full C3 and PZP like		Carbamidomethyl+C(23)	YNILPEKEEFPFALGVQTLPQTCDEPK	61	38	10	6	6	21.182	3.38229	26.0786	0.447686	0.493206	0.102087	1.71053
	171	P01023	24 1474 A2MG HUMAN RecName Full Alpha 2 macroglobulin Short Alpha 2 M AltName Full C3 and PZP like		None	AVDQSVLLMKPDAELSASSVYNLLPEK	55	38	10	1	5	24.2614	-	14.7641	0.446863	0.479306	-	1.50472
	171	P01023	24 1474 A2MG HUMAN RecName Full Alpha 2 macroglobulin Short Alpha 2 M AltName Full C3 and PZP like		None	DTVIKPLLVEPEGLEK	61	38	10	6	6	35.1062	9.49734	29.7046	0.621064	0.667329	0.112024	1.8866
	171	P01023	24 1474 A2MG HUMAN RecName Full Alpha 2 macroglobulin Short Alpha 2 M AltName Full C3 and PZP like		None	LVHVEEPHTETVR	55	38	10	1	5	26.0574	-	29.3311	1.34071	1.28339	-	2.5852
	171	P01023	24 1474 A2MG HUMAN RecName Full Alpha 2 macroglobulin Short Alpha 2 M AltName Full C3 and PZP like		None	SVSGKPQYMVLVPSLLHTETTEK	54	32	9	6	6	40.9306	14.3269	42.5383	5.71371	0.662307	0.156598	2.35745
	171	P01023	24 1474 A2MG HUMAN RecName Full Alpha 2 macroglobulin Short Alpha 2 M AltName Full C3 and PZP like		None	TEHPFTVEEFVLPK	61	38	10	6	6	35.5754	6.03467	21.9998	0.573117	0.625303	0.128498	2.21139
	171	P01023	24 1474 A2MG HUMAN RecName Full Alpha 2 macroglobulin Short Alpha 2 M AltName Full C3 and PZP like		None	TEVSSNHVLIYLDK	56	38	10	4	4	30.3473	5.18442	27.2918	0.73291	0.814342	0.144195	2.30817
	171	P01023	24 1474 A2MG HUMAN RecName Full Alpha 2 macroglobulin Short Alpha 2 M AltName Full C3 and PZP like		None	VDLSFSPSQSLPASHAHLR	61	38	10	6	6	28.2649	10.7449	33.3754	0.744443	0.804428	0.357652	2.67403
	171	P01023	24 1474 A2MG HUMAN RecName Full Alpha 2 macroglobulin Short Alpha 2 M AltName Full C3 and PZP like		None	VSVQLEASPAFLAVPVEK	61	38	10	6	6	13.5537	4.465	18.8888	0.588793	0.622568	0.0999597	1.85863
	protein.key	protein.Accession	protein.Description	protein.Key_ForHomologs	peptide.modification	peptide.seq	All Injections (61)*	Injections Samples (38)*	Injections AV (10)*	Injections IAV (6)*	Injections IRV (7)*	% CV AV #	% CV IAV #	% CV IRV #	% CV RT samples $	% CV RT AV $	% CVRT IAV $	% CV RT IRV $
	3764	P01024	23 1663 CO3 HUMAN RecName Full Complement C3 AltName Full C3 and PZP like alpha 2 macroglobulin do		Carbamidomethyl+C(10)	VELLHNPAFCSLATTK	61	38	10	6	6	30.7787	10.2638	21.4479	0.656861	0.742352	0.110143	2.01523
	3764	P01024	23 1663 CO3 HUMAN RecName Full Complement C3 AltName Full C3 and PZP like alpha 2 macroglobulin do		Carbamidomethyl+C(13)	DTWVEHWPEEDECQDEENQK	60	37	10	6	6	42.0812	7.62609	35.1581	0.648724	0.67995	0.108445	2.08059
	3764	P01024	23 1663 CO3 HUMAN RecName Full Complement C3 AltName Full C3 and PZP like alpha 2 macroglobulin do		None	EPGQDLVVLPLSITTDFIPSFR	32	19	0	6	6	-	8.05173	50.3611	0.25221		0.0547311	1.29624
	3764	P01024	23 1663 CO3 HUMAN RecName Full Complement C3 AltName Full C3 and PZP like alpha 2 macroglobulin do		None	EYVLPSFEVIVEPTEK	61	38	10	6	6	15.795	4.7428	25.7501	0.449781	0.494482	0.0949723	1.65375
	3764	P01024	23 1663 CO3 HUMAN RecName Full Complement C3 AltName Full C3 and PZP like alpha 2 macroglobulin do		None	ILLQGTPVAQMTEDAVDAER	60	38	10	6	5	21.5918	11.0194	30.279	0.454878	0.598753	0.104627	1.33651
	3764	P01024	23 1663 CO3 HUMAN RecName Full Complement C3 AltName Full C3 and PZP like alpha 2 macroglobulin do		None	IPIEDGSGEVVLSR	61	38	10	6	6	21.7824	9.20796	34.3884	0.752263	0.790193	0.108093	2.00756
	3764	P01024	23 1663 CO3 HUMAN RecName Full Complement C3 AltName Full C3 and PZP like alpha 2 macroglobulin do		None	LESEETMVLEAHDAQGDVPVTVTVHDFPGK	59	38	10	5	5	47.3202	178.554	79.1765	0.57255	0.635384	3.73218	1.98151
	3764	P01024	23 1663 CO3 HUMAN RecName Full Complement C3 AltName Full C3 and PZP like alpha 2 macroglobulin do		None	SGIPIVTSPYQIHFTK	61	38	10	6	6	36.7013	7.91961	27.8275	0.57354	0.645261	0.111205	2.27805
	3764	P01024	23 1663 CO3 HUMAN RecName Full Complement C3 AltName Full C3 and PZP like alpha 2 macroglobulin do		None	SSLSVPYVIVPLK	61	38	10	6	6	29.3915	6.94634	21.4939	0.587183	0.624276	0.100412	1.98292
	3764	P01024	23 1663 CO3 HUMAN RecName Full Complement C3 AltName Full C3 and PZP like alpha 2 macroglobulin do		None	TIYTPGSTVLYR	61	38	10	6	6	33.8612	3.77479	25.2906	0.721708	0.756398	0.112488	2.21704
	3764	P01024	23 1663 CO3 HUMAN RecName Full Complement C3 AltName Full C3 and PZP like alpha 2 macroglobulin do		None	VHQYFNVELIQPGAVK	61	38	10	6	6	36.9469	7.55287	18.9754	0.627824	0.656783	0.119125	2.13931
	3764	P01024	23 1663 CO3 HUMAN RecName Full Complement C3 AltName Full C3 and PZP like alpha 2 macroglobulin do		None	VPVAVQGEDTVQSLTQGDGVAK	61	38	10	6	6	27.0738	5.03993	25.8229	0.622404	0.665965	0.11856	1.79262
	protein.key	protein.Accession	protein.Description	protein.Key_ForHomologs	peptide.modification	peptide.seq	All Injections (61)*	Injections Samples (38)*	Injections AV (10)*	Injections IAV (6)*	Injections IRV (7)*	% CV AV #	% CV IAV #	% CV IRV #	% CV RT samples $	% CV RT AV $	% CVRT IAV $	% CV RT IRV $
	9343	P01042	19 644 KNG1 HUMAN RecName Full Kininogen 1 AltName Full High molecular weight kininogen Short HMWK		Carbamidomethyl+C(10)	ENFLFLTPDCK	60	37	10	6	6	27.6084	8.89428	15.9593	0.538776	0.6149	0.0968745	2.03413
	9343	P01042	19 644 KNG1 HUMAN RecName Full Kininogen 1 AltName Full High molecular weight kininogen Short HMWK		Carbamidomethyl+C(6)	AATGECTATVGK	16	2	2	6	5	30.0711	30.9207	39.5938	18.2586	2.94521	0.683587	2.80442
	9343	P01042	19 644 KNG1 HUMAN RecName Full Kininogen 1 AltName Full High molecular weight kininogen Short HMWK		Carbamidomethyl+C(7)	LGQSLDCNAEVYVVPWEK	60	37	10	6	6	24.8859	10.805	29.4953	0.533354	0.57031	0.107187	1.77293
	9343	P01042	19 644 KNG1 HUMAN RecName Full Kininogen 1 AltName Full High molecular weight kininogen Short HMWK		Carbamidomethyl+C(8);Carbamidomethyl+C(24);Carbamidomethyl+C(27)	FSVATQTCQITPAEGPVVTAQYDCLGCVHPISTQSPDLEPILR	50	32	6	5	6	23.6907	6.11618	38.8302	0.500914	0.209942	0.109159	1.35903
	9343	P01042	19 644 KNG1 HUMAN RecName Full Kininogen 1 AltName Full High molecular weight kininogen Short HMWK		Carbamidomethyl+C(8)	IASFSQNCDIYPGK	57	36	10	5	5	16.9907	6.1477	22.4207	0.86333	0.841629	0.16238	2.35399
	9343	P01042	19 644 KNG1 HUMAN RecName Full Kininogen 1 AltName Full High molecular weight kininogen Short HMWK		Carbamidomethyl+C(8)	IASFSQNCDIYPGKDFVQPPTK	9	0	0	4	5	-	55.7274	44.9444	-		0.134215	0.787674
	9343	P01042	19 644 KNG1 HUMAN RecName Full Kininogen 1 AltName Full High molecular weight kininogen Short HMWK		None	DIPTNSPELEETLTHTITK	60	38	9	6	6	35.2832	9.01086	25.9729	0.563183	0.536356	0.115355	1.82316
	9343	P01042	19 644 KNG1 HUMAN RecName Full Kininogen 1 AltName Full High molecular weight kininogen Short HMWK		None	TVGSDTFYSFK	6	3	3	0	0	88.9492	-	-	10.264	6.31396	-	-
	9343	P01042	19 644 KNG1 HUMAN RecName Full Kininogen 1 AltName Full High molecular weight kininogen Short HMWK		None	YNSQNQSNNQFVLYR	38	21	4	6	6	32.9248	4.34613	34.1482	7.69042	1.12772	0.112836	2.37851
	protein.key	protein.Accession	protein.Description	protein.Key_ForHomologs	peptide.modification	peptide.seq	All Injections (61)*	Injections Samples (38)*	Injections AV (10)*	Injections IAV (6)*	Injections IRV (7)*	% CV AV #	% CV IAV #	% CV IRV #	% CV RT samples $	% CV RT AV $	% CVRT IAV $	% CV RT IRV $
	9511	P01593	KV101 HUMAN RecName Full Ig kappa chain V I region AG		Carbamidomethyl+C(5)	VTITCQASQDINHYLNWYQQGPK	26	13	6	4	3	138.521	174.108	155.618	9.35134	9.63475	2.30285	10.9326
	9511	P01593	KV101 HUMAN RecName Full Ig kappa chain V I region AG		Carbamidomethyl+C(5)	VTITCQASQDINHYLNWYQQGPKK	25	13	4	4	3	56.06	103.674	94.1708	0.997881	1.98577	3.04273	1.93337
	9511	P01593	KV101 HUMAN RecName Full Ig kappa chain V I region AG		None	DIQMTQSPSSLSASVGDR	27	17	6	2	1	19.983	6.11651	-	0.797613	0.588108	0.151343	-
	9511	P01593	KV101 HUMAN RecName Full Ig kappa chain V I region AG		None	ILIYDASNLETGVPSR	36	21	8	1	5	43.7377	-	32.5618	0.430955	0.575969	-	1.82012
	9511	P01593	KV101 HUMAN RecName Full Ig kappa chain V I region AG	9519 9527	None	DIQMTQSPSSLSASVGDR	1	0	0	0	1	-	-	-	-		-	-
	9511	P01593	KV101 HUMAN RecName Full Ig kappa chain V I region AG	9519	None	DIQMTQSPSSLSASVGDR	12	5	2	2	3	96.783	21.7349	92.3666	0.411644	1.10971	0.0939915	1.52544
	9511	P01593	KV101 HUMAN RecName Full Ig kappa chain V I region AG	9553 9554 9540	None	TFGQGTK	1	0	0	0	1	-	-	-	-		-	-
	9511	P01593	KV101 HUMAN RecName Full Ig kappa chain V I region AG	9553 9554 9541	None	TFGQGTK	1	0	0	0	0	-	-	-	-		-	-
	protein.key	protein.Accession	protein.Description	protein.Key_ForHomologs	peptide.modification	peptide.seq	All Injections (61)*	Injections Samples (38)*	Injections AV (10)*	Injections IAV (6)*	Injections IRV (7)*	% CV AV #	% CV IAV #	% CV IRV #	% CV RT samples $	% CV RT AV $	% CVRT IAV $	% CV RT IRV $
	9519	P01601	23 117 KV109 HUMAN RecName Full Ig kappa chain V I region HK101 Flags Precursor Fragment		Carbamidomethyl+C(27)	FSGSGSGTDFTLTISSLQPEDFATYYCQQYNSYP	1	1	0	0	0	-	-	-	-		-	-
	9519	P01601	23 117 KV109 HUMAN RecName Full Ig kappa chain V I region HK101 Flags Precursor Fragment		Carbamidomethyl+C(4)	TITCR	4	2	0	0	2	-	-	37.0858	1.15493		-	2.6119
	9519	P01601	23 117 KV109 HUMAN RecName Full Ig kappa chain V I region HK101 Flags Precursor Fragment		Carbamidomethyl+C(5)	VTITCR	16	12	1	1	2	-	-	35.7909	1.35706		-	2.59441
	9519	P01601	23 117 KV109 HUMAN RecName Full Ig kappa chain V I region HK101 Flags Precursor Fragment		None	APKSLIYAASSLQSGVPSR	6	0	0	1	5	-	-	160.325	-		-	15.1891
	9519	P01601	23 117 KV109 HUMAN RecName Full Ig kappa chain V I region HK101 Flags Precursor Fragment		None	DIQMTQSPSSLSASVGDR	18	15	1	1	1	-	-	-	0.751631		-	-
	9519	P01601	23 117 KV109 HUMAN RecName Full Ig kappa chain V I region HK101 Flags Precursor Fragment		None	PSSLSASVGDR	3	3	0	0	0	-	-	-	1.00505		-	-
	9519	P01601	23 117 KV109 HUMAN RecName Full Ig kappa chain V I region HK101 Flags Precursor Fragment		None	QGISSWLAWYQQKPEK	2	1	0	1	0	-	-	-	-		-	-
	9519	P01601	23 117 KV109 HUMAN RecName Full Ig kappa chain V I region HK101 Flags Precursor Fragment		None	SLIYAASSLQSGVPSR	5	5	0	0	0	-	-	-	4.87358		-	-
	9519	P01601	23 117 KV109 HUMAN RecName Full Ig kappa chain V I region HK101 Flags Precursor Fragment		None	SPSSLSASVGDR	1	1	0	0	0	-	-	-	-		-	-
	9519	P01601	23 117 KV109 HUMAN RecName Full Ig kappa chain V I region HK101 Flags Precursor Fragment	9511 9527	None	DIQMTQSPSSLSASVGDR	1	0	0	0	1	-	-	-	-		-	-
	9519	P01601	23 117 KV109 HUMAN RecName Full Ig kappa chain V I region HK101 Flags Precursor Fragment	9511	None	DIQMTQSPSSLSASVGDR	12	5	2	2	3	141.421	-	111.599	0.411644	1.10971	0.0939915	1.52544
	9519	P01601	23 117 KV109 HUMAN RecName Full Ig kappa chain V I region HK101 Flags Precursor Fragment	9516	Carbamidomethyl+C(3)	ITCR	2	0	0	1	1	-	-	-	-		-	-
	9519	P01601	23 117 KV109 HUMAN RecName Full Ig kappa chain V I region HK101 Flags Precursor Fragment	9516	Carbamidomethyl+C(4)	TITCR	5	2	0	1	2	-	-	#DIV/0!	1.54911		-	1.91457
	9519	P01601	23 117 KV109 HUMAN RecName Full Ig kappa chain V I region HK101 Flags Precursor Fragment	9516	Carbamidomethyl+C(5)	VTITCR	6	2	0	1	3	-	-	173.205	1.54084		-	1.53612
	9519	P01601	23 117 KV109 HUMAN RecName Full Ig kappa chain V I region HK101 Flags Precursor Fragment	9520	Carbamidomethyl+C(4)	TITCR	3	2	1	0	0	-	-	-	0.781689		-	-
	9519	P01601	23 117 KV109 HUMAN RecName Full Ig kappa chain V I region HK101 Flags Precursor Fragment	9520	Carbamidomethyl+C(5)	VTITCR	6	5	1	0	0	-	-	-	1.52789		-	-
	protein.key	protein.Accession	protein.Description	protein.Key_ForHomologs	peptide.modification	peptide.seq	All Injections (61)*	Injections Samples (38)*	Injections AV (10)*	Injections IAV (6)*	Injections IRV (7)*	% CV AV #	% CV IAV #	% CV IRV #	% CV RT samples $	% CV RT AV $	% CVRT IAV $	% CV RT IRV $
	9539	P01617	KV204 HUMAN RecName Full Ig kappa chain V II region TEW		Carbamidomethyl+C(23)	DIVMTQSPLSLPVTPGEPASISCR	20	16	3	0	1	8.16898	-	-	0.316628	0.540511	-	-
	9539	P01617	KV204 HUMAN RecName Full Ig kappa chain V II region TEW		Carbamidomethyl+C(9)	PGEPASISCR	1	0	1	0	0	-	-	-	-		-	-
	9539	P01617	KV204 HUMAN RecName Full Ig kappa chain V II region TEW		None	ALQAPITFGQGTR	1	1	0	0	0	-	-	-	-		-	-
	9539	P01617	KV204 HUMAN RecName Full Ig kappa chain V II region TEW		None	FSGSGSGTDFTLK	20	16	3	0	1	8.76828	-	-	0.763944	0.72449	-	-
	9539	P01617	KV204 HUMAN RecName Full Ig kappa chain V II region TEW	9541	None	FSGSGSGTDFTLK	1	1	0	0	0	-	-	-	-		-	-
	protein.key	protein.Accession	protein.Description	protein.Key_ForHomologs	peptide.modification	peptide.seq	All Injections (61)*	Injections Samples (38)*	Injections AV (10)*	Injections IAV (6)*	Injections IRV (7)*	% CV AV #	% CV IAV #	% CV IRV #	% CV RT samples $	% CV RT AV $	% CVRT IAV $	% CV RT IRV $
	9544	P01621	5 100 KV303 HUMAN RecName Full Ig kappa chain V III region NG9 Flags Precursor Fragment		None	ATGIPDR	2	2	0	0	0	-	-	-	1.95953		-	-
	9544	P01621	5 100 KV303 HUMAN RecName Full Ig kappa chain V III region NG9 Flags Precursor Fragment		None	ATGIPDRFSGSASGTDFTLTISR	1	1	0	0	0	-	-	-	-		-	-
	9544	P01621	5 100 KV303 HUMAN RecName Full Ig kappa chain V III region NG9 Flags Precursor Fragment		None	EIVLTQSPGTLSLSPGER	2	2	0	0	0	-	-	-	0.618165		-	-
	9544	P01621	5 100 KV303 HUMAN RecName Full Ig kappa chain V III region NG9 Flags Precursor Fragment		None	FSGSASGTDFTLTISR	8	7	1	0	0	-	-	-	0.620651		-	-
	9544	P01621	5 100 KV303 HUMAN RecName Full Ig kappa chain V III region NG9 Flags Precursor Fragment		None	LLIYGATSR	19	16	3	0	0	24.0188	-	-	0.897651	1.14893	-	-
	9544	P01621	5 100 KV303 HUMAN RecName Full Ig kappa chain V III region NG9 Flags Precursor Fragment	9543	None	ATGIPDR	1	0	0	0	1	-	-	-	-		-	-
	9544	P01621	5 100 KV303 HUMAN RecName Full Ig kappa chain V III region NG9 Flags Precursor Fragment	9543	None	EIVLTQSPGTLSLSPGER	2	1	0	0	1	-	-	-	-		-	-
	9544	P01621	5 100 KV303 HUMAN RecName Full Ig kappa chain V III region NG9 Flags Precursor Fragment	9543	None	PDR	1	0	0	0	1	-	-	-	-		-	-
	9544	P01621	5 100 KV303 HUMAN RecName Full Ig kappa chain V III region NG9 Flags Precursor Fragment	9545	None	EIVLTQSPGTLSLSPGER	1	1	0	0	0	-	-	-	-		-	-
	9544	P01621	5 100 KV303 HUMAN RecName Full Ig kappa chain V III region NG9 Flags Precursor Fragment	9546	None	ATGIPDR	3	2	1	0	0	-	-	-	1.96466		-	-
	9544	P01621	5 100 KV303 HUMAN RecName Full Ig kappa chain V III region NG9 Flags Precursor Fragment	9546	None	EIVLTQSPGTLSLSPGER	6	5	1	0	0	-	-	-	0.341009		-	-
	9544	P01621	5 100 KV303 HUMAN RecName Full Ig kappa chain V III region NG9 Flags Precursor Fragment	9548	None	ATGIPDR	1	1	0	0	0	-	-	-	-		-	-
	9544	P01621	5 100 KV303 HUMAN RecName Full Ig kappa chain V III region NG9 Flags Precursor Fragment	9548	None	EIVLTQSPGTLSLSPGER	2	2	0	0	0	-	-	-	0.029128		-	-
	9544	P01621	5 100 KV303 HUMAN RecName Full Ig kappa chain V III region NG9 Flags Precursor Fragment	9553	None	ATGIPDR	1	1	0	0	0	-	-	-	-		-	-
	9544	P01621	5 100 KV303 HUMAN RecName Full Ig kappa chain V III region NG9 Flags Precursor Fragment	9553	None	EIVLTQSPGTLSLSPGER	2	2	0	0	0	-	-	-	1.07726		-	-
	9544	P01621	5 100 KV303 HUMAN RecName Full Ig kappa chain V III region NG9 Flags Precursor Fragment	9554	None	ATGIPDR	5	4	1	0	0	-	-	-	2.89802		-	-
	9544	P01621	5 100 KV303 HUMAN RecName Full Ig kappa chain V III region NG9 Flags Precursor Fragment	9554	None	EIVLTQSPGTLSLSPGER	7	5	2	0	0	1.86076	-	-	0.698895	1.02431	-	-
	9544	P01621	5 100 KV303 HUMAN RecName Full Ig kappa chain V III region NG9 Flags Precursor Fragment	9554	None	GIPDR	2	2	0	0	0	-	-	-	2.15206		-	-
	protein.key	protein.Accession	protein.Description	protein.Key_ForHomologs	peptide.modification	peptide.seq	All Injections (61)*	Injections Samples (38)*	Injections AV (10)*	Injections IAV (6)*	Injections IRV (7)*	% CV AV #	% CV IAV #	% CV IRV #	% CV RT samples $	% CV RT AV $	% CVRT IAV $	% CV RT IRV $
	8114	P01764	20 117 HV303 HUMAN RecName Full Ig heavy chain V III region VH26 Flags Precursor		Carbamidomethyl+C(3)	LSCAASGFTFSSYAMSWVRQAPGK	3	2	1	0	0	-	-	-	6.07575		-	-
	8114	P01764	20 117 HV303 HUMAN RecName Full Ig heavy chain V III region VH26 Flags Precursor		Carbamidomethyl+C(9)	AEDTAVYYCAK	57	36	10	4	6	23.943	158.928	60.7576	1.17204	1.11594	0.150576	2.56755
	8114	P01764	20 117 HV303 HUMAN RecName Full Ig heavy chain V III region VH26 Flags Precursor		None	EVQ	14	10	3	0	1	17.9768	-	-	0.560941	0.207113	-	-
	8114	P01764	20 117 HV303 HUMAN RecName Full Ig heavy chain V III region VH26 Flags Precursor		None	EVQLLESGGGLVQPGGSLR	57	37	10	3	6	34.0102	2.81309	33.5533	0.788182	0.642167	0.167415	1.72206
	8114	P01764	20 117 HV303 HUMAN RecName Full Ig heavy chain V III region VH26 Flags Precursor		None	GLEWVSAISGSGGSTYYGDSVK	5	2	2	0	1	6.47731	-	-	0.237054	0.6782	-	-
	8114	P01764	20 117 HV303 HUMAN RecName Full Ig heavy chain V III region VH26 Flags Precursor		None	NTLYLQMNSLR	16	5	3	3	5	4.36295	31.4134	43.5506	11.6925	11.3002	0.133474	1.99473
	8114	P01764	20 117 HV303 HUMAN RecName Full Ig heavy chain V III region VH26 Flags Precursor	8113 8116 8117	None	FTISR	1	1	0	0	0	-	-	-	-		-	-
	8114	P01764	20 117 HV303 HUMAN RecName Full Ig heavy chain V III region VH26 Flags Precursor	8113 8116	None	FTISR	1	1	0	0	0	-	-	-	-		-	-
	8114	P01764	20 117 HV303 HUMAN RecName Full Ig heavy chain V III region VH26 Flags Precursor	8116 8124	None	FTISR	1	0	0	1	0	-	-	-	-		-	-
	8114	P01764	20 117 HV303 HUMAN RecName Full Ig heavy chain V III region VH26 Flags Precursor	8116 8131	None	FTISR	4	0	0	0	4	-	-	37.3493	-		-	3.1573
	8114	P01764	20 117 HV303 HUMAN RecName Full Ig heavy chain V III region VH26 Flags Precursor	8116	None	FTISR	33	21	7	3	1	36.244	35.8742	-	1.14471	1.17476	0.142477	-
	8114	P01764	20 117 HV303 HUMAN RecName Full Ig heavy chain V III region VH26 Flags Precursor	8124	None	EVQLLESGGGLVQPGGSLR	1	0	0	1	0	-	-	-	-		-	-
	protein.key	protein.Accession	protein.Description	protein.Key_ForHomologs	peptide.modification	peptide.seq	All Injections (61)*	Injections Samples (38)*	Injections AV (10)*	Injections IAV (6)*	Injections IRV (7)*	% CV AV #	% CV IAV #	% CV IRV #	% CV RT samples $	% CV RT AV $	% CVRT IAV $	% CV RT IRV $
	8116	P01766	HV305 HUMAN RecName Full Ig heavy chain V III region BRO		Carbamidomethyl+C(9)	AEDTAVYYCAR	58	36	10	6	5	26.4113	4.33196	47.2047	1.02606	1.10664	0.14825	2.7258
	8116	P01766	HV305 HUMAN RecName Full Ig heavy chain V III region BRO		None	EVQLVESGGGLVQPGGSLR	61	38	10	6	6	35.538	7.1547	34.6337	0.680037	0.71782	0.119408	1.84343
	8116	P01766	HV305 HUMAN RecName Full Ig heavy chain V III region BRO		None	FTISR	2	0	0	2	0	-	19.8286	-	-		0.000304329	-
	8116	P01766	HV305 HUMAN RecName Full Ig heavy chain V III region BRO		None	NTLYLNMNSLR	9	3	1	2	2	-	94.4864	15.367	6.53547		7.99243	28.6004
	8116	P01766	HV305 HUMAN RecName Full Ig heavy chain V III region BRO		Oxidation+M(11)	NDSKNTLYLNMNSLR	7	6	1	0	0	-	-	-	4.50221		-	-
	8116	P01766	HV305 HUMAN RecName Full Ig heavy chain V III region BRO	8113 8114 8117	None	FTISR	1	1	0	0	0	-	-	-	-		-	-
	8116	P01766	HV305 HUMAN RecName Full Ig heavy chain V III region BRO	8113 8114	None	FTISR	1	1	0	0	0	-	-	-	-		-	-
	8116	P01766	HV305 HUMAN RecName Full Ig heavy chain V III region BRO	8113 8117	Carbamidomethyl+C(9)	AEDTAVYYCAR	1	1	0	0	0	-	-	-	-		-	-
	8116	P01766	HV305 HUMAN RecName Full Ig heavy chain V III region BRO	8113	Carbamidomethyl+C(9)	AEDTAVYYCAR	2	1	0	0	1	-	-	-	-		-	-
	8116	P01766	HV305 HUMAN RecName Full Ig heavy chain V III region BRO	8114 8124	None	FTISR	1	0	0	1	0	-	-	-	-		-	-
	8116	P01766	HV305 HUMAN RecName Full Ig heavy chain V III region BRO	8114 8131	None	FTISR	4	0	0	0	4	-	-	50.0759	-		-	3.1573
	8116	P01766	HV305 HUMAN RecName Full Ig heavy chain V III region BRO	8114	None	FTISR	33	21	7	3	1	29.7785	11.9568	-	1.14471	1.17476	0.142477	-
	protein.key	protein.Accession	protein.Description	protein.Key_ForHomologs	peptide.modification	peptide.seq	All Injections (61)*	Injections Samples (38)*	Injections AV (10)*	Injections IAV (6)*	Injections IRV (7)*	% CV AV #	% CV IAV #	% CV IRV #	% CV RT samples $	% CV RT AV $	% CVRT IAV $	% CV RT IRV $
	8377	P01834	IGKC HUMAN RecName Full Ig kappa chain C region		Carbamidomethyl+C(4)	VYACEVTHQGLSSPVTK	60	37	10	6	6	15.7264	10.1506	45.151	0.991263	1.02289	0.179808	2.25747
	8377	P01834	IGKC HUMAN RecName Full Ig kappa chain C region		Carbamidomethyl+C(8)	SGTASVVCLLNNFYPR	61	38	10	6	6	25.593	5.93509	36.1059	0.420336	0.537953	0.0956002	1.69879
	8377	P01834	IGKC HUMAN RecName Full Ig kappa chain C region		None	DSTYSLSSTLTLSK	61	38	10	6	6	29.5995	12.3804	36.9667	0.642779	0.777668	0.480824	1.77841
	8377	P01834	IGKC HUMAN RecName Full Ig kappa chain C region		None	TVAAPSVFIFPPSDEQLK	61	38	10	6	6	58.8011	7.17314	21.0096	0.614903	0.565063	0.0994472	1.82113
	8377	P01834	IGKC HUMAN RecName Full Ig kappa chain C region		None	VDNALQSGNSQESVTEQDSK	61	38	10	6	6	19.6837	13.6619	42.4724	1.26787	1.15321	0.885534	1.83587
	protein.key	protein.Accession	protein.Description	protein.Key_ForHomologs	peptide.modification	peptide.seq	All Injections (61)*	Injections Samples (38)*	Injections AV (10)*	Injections IAV (6)*	Injections IRV (7)*	% CV AV #	% CV IAV #	% CV IRV #	% CV RT samples $	% CV RT AV $	% CVRT IAV $	% CV RT IRV $
	9581	P01842	LAC HUMAN RecName Full Ig lambda chain C regions		Carbamidomethyl+C(4)	SYSCQVTHEGSTVEK	61	38	10	6	6	26.6107	9.77306	40.6277	1.40766	1.32976	0.175341	2.22709
	9581	P01842	LAC HUMAN RecName Full Ig lambda chain C regions		Carbamidomethyl+C(5)	ATLVCLISDFYPGAVTVAWK	51	38	0	6	6	-	19.7715	89.5403	0.328848		0.0754079	1.26032
	9581	P01842	LAC HUMAN RecName Full Ig lambda chain C regions		None	AAPSVTLFPPSSEELQANK	61	38	10	6	6	66.7933	10.9231	25.9887	0.922517	0.692932	0.113212	1.9771
	9581	P01842	LAC HUMAN RecName Full Ig lambda chain C regions		None	AGVETTTPSK	14	1	1	6	5	-	65.9832	38.138	-		0.76436	2.87873
	9581	P01842	LAC HUMAN RecName Full Ig lambda chain C regions		None	YAASSYLSLTPEQWK	61	38	10	6	6	31.4083	5.16737	19.9363	0.536785	0.596209	0.110242	1.87536
	protein.key	protein.Accession	protein.Description	protein.Key_ForHomologs	peptide.modification	peptide.seq	All Injections (61)*	Injections Samples (38)*	Injections AV (10)*	Injections IAV (6)*	Injections IRV (7)*	% CV AV #	% CV IAV #	% CV IRV #	% CV RT samples $	% CV RT AV $	% CVRT IAV $	% CV RT IRV $
	8370	P01857	IGHG1 HUMAN RecName Full Ig gamma 1 chain C region		Carbamidomethyl+C(4);Carbamidomethyl+C(7)	THTCPPCPAPELLGGPSVFLFPPKPK	61	38	10	6	6	30.0975	21.7459	41.1813	0.532983	0.636504	0.630644	3.38608
	8370	P01857	IGHG1 HUMAN RecName Full Ig gamma 1 chain C region		Carbamidomethyl+C(6)	TPEVTCVVVDVSHEDPEVK	61	38	10	6	6	36.4818	8.45108	32.1392	0.677164	0.717822	0.11948	1.81936
	8370	P01857	IGHG1 HUMAN RecName Full Ig gamma 1 chain C region		None	GPSVFPLAPSSK	61	38	10	6	6	32.4165	21.4059	48.2669	0.726434	0.80215	0.118924	2.49701
	8370	P01857	IGHG1 HUMAN RecName Full Ig gamma 1 chain C region		None	TTPPVLDSDGSFFLYSK	61	38	10	6	6	26.9425	28.9823	46.2018	0.537189	0.546829	0.103267	1.79474
	8370	P01857	IGHG1 HUMAN RecName Full Ig gamma 1 chain C region	8371 8372 8373	Carbamidomethyl+C(7)	NQVSLTCLVK	60	37	10	6	6	33.1383	28.5749	65.0134	0.735338	0.812401	0.120056	2.21072
	8370	P01857	IGHG1 HUMAN RecName Full Ig gamma 1 chain C region	8371 8373	None	FNWYVDGVEVHNAK	60	37	10	6	6	44.0665	8.91019	37.1618	0.895133	0.726724	0.109956	2.18908
	8370	P01857	IGHG1 HUMAN RecName Full Ig gamma 1 chain C region	8372 8373	None	VVSVLTVLHQDWLNGK	60	37	10	6	6	20.1535	6.56981	48.1933	0.452536	0.502534	0.109329	1.97645
	8370	P01857	IGHG1 HUMAN RecName Full Ig gamma 1 chain C region	8372	Carbamidomethyl+C(11)	STSGGTAALGCLVK	61	38	10	6	6	16.7186	9.19222	36.0075	0.930013	0.976437	0.120032	2.58138
	protein.key	protein.Accession	protein.Description	protein.Key_ForHomologs	peptide.modification	peptide.seq	All Injections (61)*	Injections Samples (38)*	Injections AV (10)*	Injections IAV (6)*	Injections IRV (7)*	% CV AV #	% CV IAV #	% CV IRV #	% CV RT samples $	% CV RT AV $	% CVRT IAV $	% CV RT IRV $
	8371	P01859	IGHG2 HUMAN RecName Full Ig gamma 2 chain C region		None	VVSVLTVVHQDWLNGK	61	38	10	6	6	23.3344	9.42449	32.0343	0.598499	0.62932	0.114107	2.33759
	8371	P01859	IGHG2 HUMAN RecName Full Ig gamma 2 chain C region	8370 8372 8373	Carbamidomethyl+C(7)	NQVSLTCLVK	60	37	10	6	6	19.9003	35.5297	60.0748	0.735338	0.812401	0.120056	2.21072
	8371	P01859	IGHG2 HUMAN RecName Full Ig gamma 2 chain C region	8370 8372 8373	None	DTLMISR	60	37	10	6	6	7.02835	15.5197	55.8406	1.00816	1.04784	0.165894	2.59264
	8371	P01859	IGHG2 HUMAN RecName Full Ig gamma 2 chain C region	8370 8372	Carbamidomethyl+C(7)	NQVSLTCLVK	1	1	0	0	0	-	-	-	-		-	-
	8371	P01859	IGHG2 HUMAN RecName Full Ig gamma 2 chain C region	8370 8372	None	DTLMISR	1	1	0	0	0	-	-	-	-		-	-
	8371	P01859	IGHG2 HUMAN RecName Full Ig gamma 2 chain C region	8370 8372	None	EPQVYTLPPSR	59	37	10	5	6	54.616	122.926	41.4675	1.11984	3.03603	5.04728	2.62341
	8371	P01859	IGHG2 HUMAN RecName Full Ig gamma 2 chain C region	8370 8373	None	FNWYVDGVEVHNAK	60	37	10	6	6	30.7425	15.7114	26.2848	0.895133	0.726724	0.109956	2.18908
	8371	P01859	IGHG2 HUMAN RecName Full Ig gamma 2 chain C region	8370	None	FNWYVDGVEVHNAK	1	1	0	0	0	-	-	-	-		-	-
	8371	P01859	IGHG2 HUMAN RecName Full Ig gamma 2 chain C region	8372	None	TTPPMLDSDGSFFLYSK	61	38	10	6	6	19.3402	10.8673	29.1792	0.469013	0.525902	0.0971304	1.7467
	8371	P01859	IGHG2 HUMAN RecName Full Ig gamma 2 chain C region	8373	Carbamidomethyl+C(11)	STSESTAALGCLVK	60	37	10	6	6	16.0666	7.36352	44.1812	0.811108	0.840881	0.115495	2.20922
	protein.key	protein.Accession	protein.Description	protein.Key_ForHomologs	peptide.modification	peptide.seq	All Injections (61)*	Injections Samples (38)*	Injections AV (10)*	Injections IAV (6)*	Injections IRV (7)*	% CV AV #	% CV IAV #	% CV IRV #	% CV RT samples $	% CV RT AV $	% CVRT IAV $	% CV RT IRV $
	8372	P01860	IGHG3 HUMAN RecName Full Ig gamma 3 chain C region AltName Full Heavy chain disease protein AltNam	8370 8371 8373	Carbamidomethyl+C(7)	NQVSLTCLVK	60	37	10	6	6	30.8075	34.0302	52.2646	0.735338	0.812401	0.120056	2.21072
	8372	P01860	IGHG3 HUMAN RecName Full Ig gamma 3 chain C region AltName Full Heavy chain disease protein AltNam	8370 8371 8373	None	DTLMISR	60	37	10	6	6	14.5511	14.4805	61.536	1.00816	1.04784	0.165894	2.59264
	8372	P01860	IGHG3 HUMAN RecName Full Ig gamma 3 chain C region AltName Full Heavy chain disease protein AltNam	8370 8371	Carbamidomethyl+C(7)	NQVSLTCLVK	1	1	0	0	0	-	-	-	-		-	-
	8372	P01860	IGHG3 HUMAN RecName Full Ig gamma 3 chain C region AltName Full Heavy chain disease protein AltNam	8370 8371	None	EPQVYTLPPSR	59	37	10	5	6	53.7424	119.517	39.2875	1.11984	3.03603	5.04728	2.62341
	8372	P01860	IGHG3 HUMAN RecName Full Ig gamma 3 chain C region AltName Full Heavy chain disease protein AltNam	8370 8373	None	VVSVLTVLHQDWLNGK	60	37	10	6	6	18.6255	9.20066	30.9144	0.452536	0.502534	0.109329	1.97645
	8372	P01860	IGHG3 HUMAN RecName Full Ig gamma 3 chain C region AltName Full Heavy chain disease protein AltNam	8370	Carbamidomethyl+C(11)	STSGGTAALGCLVK	61	38	10	6	6	15.566	13.8214	42.6614	0.930013	0.976437	0.120032	2.58138
	8372	P01860	IGHG3 HUMAN RecName Full Ig gamma 3 chain C region AltName Full Heavy chain disease protein AltNam	8370	None	ALPAPIEK	61	38	10	6	6	18.5033	6.23052	63.7172	1.17489	1.19547	0.140074	2.83344
	8372	P01860	IGHG3 HUMAN RecName Full Ig gamma 3 chain C region AltName Full Heavy chain disease protein AltNam	8370	None	VVSVLTVLHQDWLNGK	1	1	0	0	0	-	-	-	-		-	-
	8372	P01860	IGHG3 HUMAN RecName Full Ig gamma 3 chain C region AltName Full Heavy chain disease protein AltNam	8371	None	EPQVYTLPPSREEMTK	25	10	2	6	6	52.5706	16.5463	56.5882	25.5769	1.14569	0.223219	2.28771
	8372	P01860	IGHG3 HUMAN RecName Full Ig gamma 3 chain C region AltName Full Heavy chain disease protein AltNam	8371	None	TTPPMLDSDGSFFLYSK	61	38	10	6	6	30.0593	12.7883	29.0571	0.469013	0.525902	0.0971304	1.7467
	protein.key	protein.Accession	protein.Description	protein.Key_ForHomologs	peptide.modification	peptide.seq	All Injections (61)*	Injections Samples (38)*	Injections AV (10)*	Injections IAV (6)*	Injections IRV (7)*	% CV AV #	% CV IAV #	% CV IRV #	% CV RT samples $	% CV RT AV $	% CVRT IAV $	% CV RT IRV $
	8373	P01861	IGHG4 HUMAN RecName Full Ig gamma 4 chain C region	8370 8371 8372	Carbamidomethyl+C(7)	NQVSLTCLVK	60	37	10	6	6	38.5386	37.0253	68.1474	0.735338	0.812401	0.120056	2.21072
	8373	P01861	IGHG4 HUMAN RecName Full Ig gamma 4 chain C region	8370 8371	None	FNWYVDGVEVHNAK	60	37	10	6	6	48.5013	16.4738	35.1612	0.895133	0.726724	0.109956	2.18908
	8373	P01861	IGHG4 HUMAN RecName Full Ig gamma 4 chain C region	8370 8372	None	VVSVLTVLHQDWLNGK	60	37	10	6	6	24.9405	16.6687	53.3652	0.452536	0.502534	0.109329	1.97645
	8373	P01861	IGHG4 HUMAN RecName Full Ig gamma 4 chain C region	8370	None	GFYPSDIAVEWESNGQPENNYK	60	37	10	6	6	27.9649	22.2542	44.4532	0.748885	0.524785	0.377374	1.91236
	8373	P01861	IGHG4 HUMAN RecName Full Ig gamma 4 chain C region	8371	Carbamidomethyl+C(11)	STSESTAALGCLVK	60	37	10	6	6	33.4504	7.143	49.2193	0.811108	0.840881	0.115495	2.20922
	protein.key	protein.Accession	protein.Description	protein.Key_ForHomologs	peptide.modification	peptide.seq	All Injections (61)*	Injections Samples (38)*	Injections AV (10)*	Injections IAV (6)*	Injections IRV (7)*	% CV AV #	% CV IAV #	% CV IRV #	% CV RT samples $	% CV RT AV $	% CVRT IAV $	% CV RT IRV $
	8374	P01871	IGHM HUMAN RecName Full Ig mu chain C region		Carbamidomethyl+C(12)	DVMQGTDEHVVCK	60	37	10	6	6	16.8998	12.0504	48.1442	1.28608	1.20669	1.16759	2.22888
	8374	P01871	IGHM HUMAN RecName Full Ig mu chain C region		Carbamidomethyl+C(3)	FTCTVTHTDLPSPLK	52	30	10	6	5	17.0339	5.172	41.2007	0.735875	0.847049	0.116831	2.43887
	8374	P01871	IGHM HUMAN RecName Full Ig mu chain C region		Carbamidomethyl+C(3)	LICQATGFSPR	56	34	10	6	5	14.4275	3.14606	38.3926	0.917193	0.96581	0.212467	2.88658
	8374	P01871	IGHM HUMAN RecName Full Ig mu chain C region		None	VFAIPPSFASIFLTK	49	29	8	6	5	17.2965	6.21903	48.7109	0.390114	0.361222	0.0716934	1.74092
	8374	P01871	IGHM HUMAN RecName Full Ig mu chain C region		None	VSVFVPPR	55	33	10	6	5	20.3499	5.12865	47.1961	0.938143	0.988404	0.154142	2.827
	8374	P01871	IGHM HUMAN RecName Full Ig mu chain C region		None	YAATSQVLLPSK	61	38	10	6	6	15.5599	5.27333	31.8549	0.964758	0.953047	0.18473	2.2598
	8374	P01871	IGHM HUMAN RecName Full Ig mu chain C region		None	YVTSAPMPEPQAPGR	55	34	10	6	4	10.224	10.3832	40.1689	0.911722	0.958715	0.20765	2.49163
	8374	P01871	IGHM HUMAN RecName Full Ig mu chain C region	11061	Carbamidomethyl+C(3)	FTCTVTHTDLPSPLK	5	4	0	0	1	-	-	-	1.18884		-	-
	8374	P01871	IGHM HUMAN RecName Full Ig mu chain C region	11061	Carbamidomethyl+C(3)	LICQATGFSPR	5	4	0	0	1	-	-	-	1.42238		-	-
	8374	P01871	IGHM HUMAN RecName Full Ig mu chain C region	11061	None	VFAIPPSFASIFLTK	4	3	0	0	1	-	-	-	0.631988		-	-
	8374	P01871	IGHM HUMAN RecName Full Ig mu chain C region	11061	None	YVTSAPMPEPQAPGR	5	4	0	0	1	-	-	-	1.42973		-	-
	protein.key	protein.Accession	protein.Description	protein.Key_ForHomologs	peptide.modification	peptide.seq	All Injections (61)*	Injections Samples (38)*	Injections AV (10)*	Injections IAV (6)*	Injections IRV (7)*	% CV AV #	% CV IAV #	% CV IRV #	% CV RT samples $	% CV RT AV $	% CVRT IAV $	% CV RT IRV $
	8366	P01876	IGHA1 HUMAN RecName Full Ig alpha 1 chain C region		Carbamidomethyl+C(26)	NFPPSQDASGDLYTTSSQLTLPATQCLAGK	59	37	9	6	6	50.6536	9.31747	38.6467	1.74355	2.24089	1.5042	1.95278
	8366	P01876	IGHA1 HUMAN RecName Full Ig alpha 1 chain C region		Carbamidomethyl+C(3);Carbamidomethyl+C(5);Carbamidomethyl+C(15)	DLCGCYSVSSVLPGCAEPWNHGK	61	38	10	6	6	33.0039	11.0449	26.0504	0.553924	0.593572	0.113965	1.78404
	8366	P01876	IGHA1 HUMAN RecName Full Ig alpha 1 chain C region		Carbamidomethyl+C(4)	TFTCTAAYPESK	61	38	10	6	6	20.9817	4.4867	38.5366	1.11953	1.06113	0.147904	2.30579
	8366	P01876	IGHA1 HUMAN RecName Full Ig alpha 1 chain C region		None	DASGVTFTWTPSSGK	56	33	10	6	6	37.0274	6.43564	27.8895	2.22619	0.62883	0.111033	2.18655
	8366	P01876	IGHA1 HUMAN RecName Full Ig alpha 1 chain C region		None	QEPSQGTTTFAVTSILR	9	7	1	1	0	-	-	-	0.902776		-	-
	8366	P01876	IGHA1 HUMAN RecName Full Ig alpha 1 chain C region		None	TPLTATLSK	61	38	10	6	6	16.5474	4.41392	33.0044	1.06108	1.08778	0.168781	2.69695
	8366	P01876	IGHA1 HUMAN RecName Full Ig alpha 1 chain C region		None	WLQGSQELPR	9	7	1	1	0	-	-	-	1.31233		-	-
	8366	P01876	IGHA1 HUMAN RecName Full Ig alpha 1 chain C region	8367	None	QEPSQGTTTFAVTSILR	52	31	9	5	6	9.70691	5.73873	23.3128	0.460164	0.524218	0.0816359	1.95734
	8366	P01876	IGHA1 HUMAN RecName Full Ig alpha 1 chain C region	8367	None	WLQGSQELPR	52	31	9	5	6	17.1279	5.40232	42.532	0.750823	0.760407	0.157027	2.48718
	protein.key	protein.Accession	protein.Description	protein.Key_ForHomologs	peptide.modification	peptide.seq	All Injections (61)*	Injections Samples (38)*	Injections AV (10)*	Injections IAV (6)*	Injections IRV (7)*	% CV AV #	% CV IAV #	% CV IRV #	% CV RT samples $	% CV RT AV $	% CVRT IAV $	% CV RT IRV $
	8367	P01877	IGHA2 HUMAN RecName Full Ig alpha 2 chain C region		Carbamidomethyl+C(3);Carbamidomethyl+C(5);Carbamidomethyl+C(15);Carbamidomethyl+C(27)	DLCGCYSVSSVLPGCAQPWNHGETFTCTAAHPELK	45	28	6	4	6	24.1231	18.9424	70.5939	0.481828	0.406533	0.171613	1.64701
	8367	P01877	IGHA2 HUMAN RecName Full Ig alpha 2 chain C region	8366	Carbamidomethyl+C(29)	SGNTFRPEVHLLPPPSEELALNELVTLTCLAR	38	26	0	5	6	-	77.7062	85.598	0.338955		6.85267	6.06924
	8367	P01877	IGHA2 HUMAN RecName Full Ig alpha 2 chain C region	8366	None	QEPSQGTTTFAVTSILR	52	31	9	5	6	14.3671	11.5132	43.8012	0.460164	0.524218	0.0816359	1.95734
	8367	P01877	IGHA2 HUMAN RecName Full Ig alpha 2 chain C region	8366	None	SAVQGPPER	52	31	9	5	6	67.1284	18.509	50.3198	1.83129	1.46726	0.576102	2.4134
	8367	P01877	IGHA2 HUMAN RecName Full Ig alpha 2 chain C region	8366	None	VAAEDWK	48	29	8	5	5	13.728	22.0968	63.499	1.47545	1.20676	0.0701262	2.96905
	8367	P01877	IGHA2 HUMAN RecName Full Ig alpha 2 chain C region	8366	None	WLQGSQELPR	52	31	9	5	6	14.7282	16.2707	52.8802	0.750823	0.760407	0.157027	2.48718
	8367	P01877	IGHA2 HUMAN RecName Full Ig alpha 2 chain C region	8366	None	YLTWASR	49	31	9	5	4	15.993	13.5364	40.1066	0.904975	0.841254	0.0956723	0.860724
	protein.key	protein.Accession	protein.Description	protein.Key_ForHomologs	peptide.modification	peptide.seq	All Injections (61)*	Injections Samples (38)*	Injections AV (10)*	Injections IAV (6)*	Injections IRV (7)*	% CV AV #	% CV IAV #	% CV IRV #	% CV RT samples $	% CV RT AV $	% CVRT IAV $	% CV RT IRV $
	952	P02647	19 267 APOA1 HUMAN RecName Full Apolipoprotein A I Short Apo AI Short ApoA I Contains RecName Full		None	ATEHLSTLSEK	61	38	10	6	6	28.7066	7.37601	45.9183	1.54522	1.45075	0.168506	2.65657
	952	P02647	19 267 APOA1 HUMAN RecName Full Apolipoprotein A I Short Apo AI Short ApoA I Contains RecName Full		None	DLATVYVDVLK	61	38	10	6	6	12.7792	13.7785	12.3359	0.526337	0.578019	0.0903825	1.6395
	952	P02647	19 267 APOA1 HUMAN RecName Full Apolipoprotein A I Short Apo AI Short ApoA I Contains RecName Full		None	DYVSQFEGSALGK	60	38	10	6	5	30.0576	8.64005	16.8806	0.555012	0.548586	0.158936	1.59016
	952	P02647	19 267 APOA1 HUMAN RecName Full Apolipoprotein A I Short Apo AI Short ApoA I Contains RecName Full		None	EQLGPVTQEFWDNLEK	61	38	10	6	6	24.3583	17.163	51.6995	0.438239	0.471691	0.0963921	1.56995
	952	P02647	19 267 APOA1 HUMAN RecName Full Apolipoprotein A I Short Apo AI Short ApoA I Contains RecName Full		None	LLDNWDSVTSTFSK	61	38	10	6	6	28.0934	5.91121	16.9269	0.537368	0.620879	0.273477	1.71552
	952	P02647	19 267 APOA1 HUMAN RecName Full Apolipoprotein A I Short Apo AI Short ApoA I Contains RecName Full		None	LREQLGPVTQEFWDNLEK	27	12	2	6	6	22.1066	5.55752	26.2908	0.493705	0.138719	0.170733	2.03019
	952	P02647	19 267 APOA1 HUMAN RecName Full Apolipoprotein A I Short Apo AI Short ApoA I Contains RecName Full		None	QGLLPVLESFK	58	38	10	6	3	17.3843	13.4426	45.8934	0.454568	0.513538	0.086806	2.14617
	952	P02647	19 267 APOA1 HUMAN RecName Full Apolipoprotein A I Short Apo AI Short ApoA I Contains RecName Full		None	VQPYLDDFQK	54	31	10	6	6	19.8904	8.74071	22.676	0.840468	0.810568	0.110996	2.29761
	952	P02647	19 267 APOA1 HUMAN RecName Full Apolipoprotein A I Short Apo AI Short ApoA I Contains RecName Full		None	VSFLSALEEYTK	57	38	10	5	3	25.8573	15.4768	78.2197	0.474065	0.470409	0.0950732	1.63075
	952	P02647	19 267 APOA1 HUMAN RecName Full Apolipoprotein A I Short Apo AI Short ApoA I Contains RecName Full		None	WQEEMELYR	61	38	10	6	6	25.4638	45.6306	34.5467	0.70242	0.716857	0.650382	1.30351
	protein.key	protein.Accession	protein.Description	protein.Key_ForHomologs	peptide.modification	peptide.seq	All Injections (61)*	Injections Samples (38)*	Injections AV (10)*	Injections IAV (6)*	Injections IRV (7)*	% CV AV #	% CV IAV #	% CV IRV #	% CV RT samples $	% CV RT AV $	% CVRT IAV $	% CV RT IRV $
	963	P02649	19 317 APOE HUMAN RecName Full Apolipoprotein E Short Apo E Flags Precursor		Carbamidomethyl+C(9)	LGADMEDVCGR	29	19	6	0	3	8.21235	-	13.5834	15.9402	1.11881	-	2.05275
	963	P02649	19 317 APOE HUMAN RecName Full Apolipoprotein E Short Apo E Flags Precursor		None	AATVGSLAGQPLQER	50	31	10	2	6	21.6731	6.47167	32.3672	0.979264	0.926529	0.0484386	2.21616
	963	P02649	19 317 APOE HUMAN RecName Full Apolipoprotein E Short Apo E Flags Precursor		None	ALMDETMK	3	3	0	0	0	-	-	-	27.1892		-	-
	963	P02649	19 317 APOE HUMAN RecName Full Apolipoprotein E Short Apo E Flags Precursor		None	FWDYLR	6	5	1	0	0	-	-	-	0.168959		-	-
	963	P02649	19 317 APOE HUMAN RecName Full Apolipoprotein E Short Apo E Flags Precursor		None	LAVYQAGAR	31	18	6	1	5	17.8723	-	30.5618	1.3306	0.949921	-	2.62228
	963	P02649	19 317 APOE HUMAN RecName Full Apolipoprotein E Short Apo E Flags Precursor		None	LGPLVEQGR	30	19	8	0	2	11.8646	-	28.8015	1.33506	1.28009	-	2.51944
	963	P02649	19 317 APOE HUMAN RecName Full Apolipoprotein E Short Apo E Flags Precursor		None	LQAEAFQAR	15	8	2	1	4	68.7253	-	32.4604	14.7457	5.80327	-	3.06065
	963	P02649	19 317 APOE HUMAN RecName Full Apolipoprotein E Short Apo E Flags Precursor		None	QWAGLVEK	1	1	0	0	0	-	-	-	-		-	-
	963	P02649	19 317 APOE HUMAN RecName Full Apolipoprotein E Short Apo E Flags Precursor		None	SELEEQLTPVAEETR	44	26	8	3	6	28.3774	5.4693	30.3808	0.822109	0.837322	0.0888269	1.96871
	963	P02649	19 317 APOE HUMAN RecName Full Apolipoprotein E Short Apo E Flags Precursor		None	SWFEPLVEDMQR	38	23	7	3	5	18.2402	6.25117	22.5578	0.321351	0.370553	0.113889	1.78695
	963	P02649	19 317 APOE HUMAN RecName Full Apolipoprotein E Short Apo E Flags Precursor		None	VQAAVGTSAAPVPSDNH	44	28	10	0	5	23.7063	-	22.7587	1.1411	1.17462	-	2.01387
	963	P02649	19 317 APOE HUMAN RecName Full Apolipoprotein E Short Apo E Flags Precursor		None	WELALGR	15	9	6	0	0	47.8175	-	-	0.79747	0.93084	-	-
	963	P02649	19 317 APOE HUMAN RecName Full Apolipoprotein E Short Apo E Flags Precursor		None	WVQTLSEQVQEELLSSQVTQELR	28	20	3	2	3	10.3164	14.6546	11.9755	3.85826	0.172595	0.159869	0.597288
	protein.key	protein.Accession	protein.Description	protein.Key_ForHomologs	peptide.modification	peptide.seq	All Injections (61)*	Injections Samples (38)*	Injections AV (10)*	Injections IAV (6)*	Injections IRV (7)*	% CV AV #	% CV IAV #	% CV IRV #	% CV RT samples $	% CV RT AV $	% CVRT IAV $	% CV RT IRV $
	953	P02652	19 100 APOA2 HUMAN RecName Full Apolipoprotein A II Short Apo AII Short ApoA II Contains RecName F		Carbamidomethyl+C(3)	EPCVESLVSQYFQTVTDYGK	61	38	10	6	6	24.3623	6.53597	24.4755	0.351855	0.361425	0.0779374	1.43238
	953	P02652	19 100 APOA2 HUMAN RecName Full Apolipoprotein A II Short Apo AII Short ApoA II Contains RecName F		None	AGTELVNFLSYFVELGTQPATQ	15	2	0	6	6	-	12.8166	68.7102	22.7663		0.0216019	0.319432
	953	P02652	19 100 APOA2 HUMAN RecName Full Apolipoprotein A II Short Apo AII Short ApoA II Contains RecName F		None	EQLTPLIK	57	38	10	6	2	18.2678	15.4793	38.0724	1.00127	1.00704	0.116126	0.214365
	953	P02652	19 100 APOA2 HUMAN RecName Full Apolipoprotein A II Short Apo AII Short ApoA II Contains RecName F		None	SKEQLTPLIK	60	37	10	6	6	19.548	11.1559	20.8466	1.04778	1.10475	0.206061	3.01541
	953	P02652	19 100 APOA2 HUMAN RecName Full Apolipoprotein A II Short Apo AII Short ApoA II Contains RecName F		None	SPELQAEAK	61	38	10	6	6	33.2437	52.3232	28.2211	1.61032	1.5322	2.98859	2.7624
	protein.key	protein.Accession	protein.Description	protein.Key_ForHomologs	peptide.modification	peptide.seq	All Injections (61)*	Injections Samples (38)*	Injections AV (10)*	Injections IAV (6)*	Injections IRV (7)*	% CV AV #	% CV IAV #	% CV IRV #	% CV RT samples $	% CV RT AV $	% CVRT IAV $	% CV RT IRV $
	958	P02654	27 83 APOC1 HUMAN RecName Full Apolipoprotein C I Short Apo CI Short ApoC I Flags Precursor		None	EFGNTLEDK	33	25	8	0	0	22.1796	-	-	1.07712	1.28395	-	-
	958	P02654	27 83 APOC1 HUMAN RecName Full Apolipoprotein C I Short Apo CI Short ApoC I Flags Precursor		None	EWFSETFQK	40	31	9	0	0	28.4447	-	-	0.605743	0.692769	-	-
	958	P02654	27 83 APOC1 HUMAN RecName Full Apolipoprotein C I Short Apo CI Short ApoC I Flags Precursor		None	LKEFGNTLEDK	16	11	5	0	0	43.9189	-	-	8.6999	9.93587	-	-
	958	P02654	27 83 APOC1 HUMAN RecName Full Apolipoprotein C I Short Apo CI Short ApoC I Flags Precursor		None	MREWFSETFQK	7	6	1	0	0	-	-	-	3.2386		-	-
	958	P02654	27 83 APOC1 HUMAN RecName Full Apolipoprotein C I Short Apo CI Short ApoC I Flags Precursor		None	TPDVSSALDK	39	31	8	0	0	12.638	-	-	1.0734	0.987307	-	-
	protein.key	protein.Accession	protein.Description	protein.Key_ForHomologs	peptide.modification	peptide.seq	All Injections (61)*	Injections Samples (38)*	Injections AV (10)*	Injections IAV (6)*	Injections IRV (7)*	% CV AV #	% CV IAV #	% CV IRV #	% CV RT samples $	% CV RT AV $	% CVRT IAV $	% CV RT IRV $
	959	P02655	23 101 APOC2 HUMAN RecName Full Apolipoprotein C II Short Apo CII Short ApoC II Flags Precursor		None	ESLSSYWESAK	31	20	8	2	1	35.2969	6.78392	-	0.452948	0.615154	0.11655	-
	959	P02655	23 101 APOC2 HUMAN RecName Full Apolipoprotein C II Short Apo CII Short ApoC II Flags Precursor		None	STAAMSTYTGIFTDQVLSVLK	15	13	2	0	0	5.97555	-	-	6.0791	0.154068	-	-
	959	P02655	23 101 APOC2 HUMAN RecName Full Apolipoprotein C II Short Apo CII Short ApoC II Flags Precursor		None	TAAQNLYEK	28	18	9	0	1	27.8704	-	-	1.42832	1.43761	-	-
	959	P02655	23 101 APOC2 HUMAN RecName Full Apolipoprotein C II Short Apo CII Short ApoC II Flags Precursor		None	TQQPQQDEMPSPTFLTQVK	26	17	8	0	1	25.3523	-	-	0.56617	0.616635	-	-
	959	P02655	23 101 APOC2 HUMAN RecName Full Apolipoprotein C II Short Apo CII Short ApoC II Flags Precursor		None	TYLPAVDEK	32	21	9	2	0	19.9374	6.57016	-	0.89889	1.052	0.294719	-
	protein.key	protein.Accession	protein.Description	protein.Key_ForHomologs	peptide.modification	peptide.seq	All Injections (61)*	Injections Samples (38)*	Injections AV (10)*	Injections IAV (6)*	Injections IRV (7)*	% CV AV #	% CV IAV #	% CV IRV #	% CV RT samples $	% CV RT AV $	% CVRT IAV $	% CV RT IRV $
	960	P02656	21 99 APOC3 HUMAN RecName Full Apolipoprotein C III Short Apo CIII Short ApoC III Flags Precursor		None	DALSSVQESQVA	2	0	0	2	0	-	7.65457	-	-		0.152699	-
	960	P02656	21 99 APOC3 HUMAN RecName Full Apolipoprotein C III Short Apo CIII Short ApoC III Flags Precursor		None	DALSSVQESQVAQQAR	59	38	10	5	5	11.2677	6.49838	20.9822	0.895907	0.872031	0.237678	1.89042
	960	P02656	21 99 APOC3 HUMAN RecName Full Apolipoprotein C III Short Apo CIII Short ApoC III Flags Precursor		None	DALSSVQESQVAQQARGWVTDGFSSLK	2	0	0	1	0	-	-	-	-		-	-
	960	P02656	21 99 APOC3 HUMAN RecName Full Apolipoprotein C III Short Apo CIII Short ApoC III Flags Precursor		None	DYWSTVK	33	27	6	0	0	17.1967	-	-	1.07689	1.12834	-	-
	960	P02656	21 99 APOC3 HUMAN RecName Full Apolipoprotein C III Short Apo CIII Short ApoC III Flags Precursor		None	DYWSTVKDK	1	1	0	0	0	-	-	-	-		-	-
	960	P02656	21 99 APOC3 HUMAN RecName Full Apolipoprotein C III Short Apo CIII Short ApoC III Flags Precursor		None	FSEFWDLDPEVRPTSAVAA	21	16	3	1	1	16.1408	-	-	3.7175	0.0565406	-	-
	960	P02656	21 99 APOC3 HUMAN RecName Full Apolipoprotein C III Short Apo CIII Short ApoC III Flags Precursor		None	GWVTDGFSSLK	48	38	10	0	0	37.0566	-	-	0.606831	0.597594	-	-
	960	P02656	21 99 APOC3 HUMAN RecName Full Apolipoprotein C III Short Apo CIII Short ApoC III Flags Precursor		None	GWVTDGFSSLKDYWSTVK	2	0	0	1	1	-	-	-	-		-	-
	960	P02656	21 99 APOC3 HUMAN RecName Full Apolipoprotein C III Short Apo CIII Short ApoC III Flags Precursor		None	GWVTDGFSSLKDYWSTVKDK	2	0	0	0	1	-	-	-	-		-	0.224713
	960	P02656	21 99 APOC3 HUMAN RecName Full Apolipoprotein C III Short Apo CIII Short ApoC III Flags Precursor		None	SEAEDASLLSFMQGYMK	9	0	0	4	5	-	27.4591	54.6213	-		0.103099	1.45196
	protein.key	protein.Accession	protein.Description	protein.Key_ForHomologs	peptide.modification	peptide.seq	All Injections (61)*	Injections Samples (38)*	Injections AV (10)*	Injections IAV (6)*	Injections IRV (7)*	% CV AV #	% CV IAV #	% CV IRV #	% CV RT samples $	% CV RT AV $	% CVRT IAV $	% CV RT IRV $
	6470	P02671	20 866 FIBA HUMAN RecName Full Fibrinogen alpha chain Contains RecName Full Fibrinopeptide A Flags		Carbamidomethyl+C(11)	EVVTSEDGSDCPEAMDLGTLSGIGTLDGFR	60	37	10	6	6	18.4435	12.0989	46.8639	0.410833	0.426842	0.0871517	1.41732
	6470	P02671	20 866 FIBA HUMAN RecName Full Fibrinogen alpha chain Contains RecName Full Fibrinopeptide A Flags		Carbamidomethyl+C(7)	DSDWPFCSDEDWNYK	55	34	10	4	6	32.5559	4.88463	34.8615	0.395767	0.436925	0.137916	1.65167
	6470	P02671	20 866 FIBA HUMAN RecName Full Fibrinogen alpha chain Contains RecName Full Fibrinopeptide A Flags		None	ADSGEGDFLAEGGGVR	59	37	10	6	5	19.4601	7.21936	30.7112	0.805063	0.784003	0.117338	2.25167
	6470	P02671	20 866 FIBA HUMAN RecName Full Fibrinogen alpha chain Contains RecName Full Fibrinopeptide A Flags		None	DSHSLTTNIMEILR	59	36	10	6	6	24.2744	8.68478	24.6583	0.461831	0.529406	0.109504	1.76568
	6470	P02671	20 866 FIBA HUMAN RecName Full Fibrinogen alpha chain Contains RecName Full Fibrinopeptide A Flags		None	ESSSHHPGIAEFPSR	57	37	10	3	6	22.8914	25.0769	49.1077	1.32592	1.31907	0.297137	3.14875
	6470	P02671	20 866 FIBA HUMAN RecName Full Fibrinogen alpha chain Contains RecName Full Fibrinopeptide A Flags		None	EVDLKDYEDQQK	25	11	2	5	6	26.524	10.2858	47.2686	12.7288	0.275786	0.173512	2.05743
	6470	P02671	20 866 FIBA HUMAN RecName Full Fibrinogen alpha chain Contains RecName Full Fibrinopeptide A Flags		None	GGSTSYGTGSETESPR	60	37	10	6	6	33.4236	15.2204	45.0063	1.4257	1.31501	0.281019	2.02595
	6470	P02671	20 866 FIBA HUMAN RecName Full Fibrinogen alpha chain Contains RecName Full Fibrinopeptide A Flags		None	GLIDEVNQDFTNR	60	37	10	6	6	27.0881	9.55181	24.7052	0.556285	0.568377	0.107282	1.68413
	6470	P02671	20 866 FIBA HUMAN RecName Full Fibrinogen alpha chain Contains RecName Full Fibrinopeptide A Flags		None	HPDEAAFFDTASTGK	56	37	10	3	5	18.1109	65.8151	29.2618	0.968964	0.947277	10.4565	2.58135
	6470	P02671	20 866 FIBA HUMAN RecName Full Fibrinogen alpha chain Contains RecName Full Fibrinopeptide A Flags		None	MKPVPDLVPGNFK	56	36	10	4	5	34.7227	14.0282	42.8141	0.66708	0.760619	0.0997687	2.28359
	6470	P02671	20 866 FIBA HUMAN RecName Full Fibrinogen alpha chain Contains RecName Full Fibrinopeptide A Flags		None	NNKDSHSLTTNIMEILR	28	23	4	0	1	17.1054	-	-	1.34388	0.158314	-	-
	6470	P02671	20 866 FIBA HUMAN RecName Full Fibrinogen alpha chain Contains RecName Full Fibrinopeptide A Flags		None	NSLFEYQK	53	37	10	0	5	16.7834	-	25.6732	0.923635	0.886176	-	2.54446
	6470	P02671	20 866 FIBA HUMAN RecName Full Fibrinogen alpha chain Contains RecName Full Fibrinopeptide A Flags		None	TFPGFFSPMLGEFVSETESR	35	19	3	6	6	33.8159	15.4209	74.0547	3.94255	13.465	0.0687335	1.4503
	protein.key	protein.Accession	protein.Description	protein.Key_ForHomologs	peptide.modification	peptide.seq	All Injections (61)*	Injections Samples (38)*	Injections AV (10)*	Injections IAV (6)*	Injections IRV (7)*	% CV AV #	% CV IAV #	% CV IRV #	% CV RT samples $	% CV RT AV $	% CVRT IAV $	% CV RT IRV $
	6471	P02675	31 491 FIBB HUMAN RecName Full Fibrinogen beta chain Contains RecName Full Fibrinopeptide B Flags		Carbamidomethyl+C(3);Carbamidomethyl+C(7)	TPCTVSCNIPVVSGK	60	37	10	6	6	14.713	4.11562	35.2979	0.996428	0.896697	0.19316	2.14259
	6471	P02675	31 491 FIBB HUMAN RecName Full Fibrinogen beta chain Contains RecName Full Fibrinopeptide B Flags		Carbamidomethyl+C(3)	NYCGLPGEYWLGNDK	60	37	10	6	6	28.0313	3.81267	28.334	0.527963	0.564834	0.110931	1.96746
	6471	P02675	31 491 FIBB HUMAN RecName Full Fibrinogen beta chain Contains RecName Full Fibrinopeptide B Flags		None	DNENVVNEYSSELEK	60	37	10	6	6	32.3663	3.73654	29.1269	0.640257	0.635008	0.112176	1.72773
	6471	P02675	31 491 FIBB HUMAN RecName Full Fibrinogen beta chain Contains RecName Full Fibrinopeptide B Flags		None	HQLYIDETVNSNIPTNLR	60	37	10	6	6	34.7765	13.8464	23.8588	0.672939	0.713533	1.21058	1.89239
	protein.key	protein.Accession	protein.Description	protein.Key_ForHomologs	peptide.modification	peptide.seq	All Injections (61)*	Injections Samples (38)*	Injections AV (10)*	Injections IAV (6)*	Injections IRV (7)*	% CV AV #	% CV IAV #	% CV IRV #	% CV RT samples $	% CV RT AV $	% CVRT IAV $	% CV RT IRV $
	6472	P02679	27 453 FIBG HUMAN RecName Full Fibrinogen gamma chain Flags Precursor		Carbamidomethyl+C(3);Carbamidomethyl+C(4)	DNCCILDER	59	37	10	6	5	18.232	9.12343	35.943	0.947487	0.914376	0.189256	2.72186
	6472	P02679	27 453 FIBG HUMAN RecName Full Fibrinogen gamma chain Flags Precursor		Carbamidomethyl+C(5);Carbamidomethyl+C(9)	FGSYCPTTCGIADFLSTYQTK	60	37	10	6	6	23.9598	9.86959	22.4434	0.427636	0.447776	0.0962634	1.58186
	6472	P02679	27 453 FIBG HUMAN RecName Full Fibrinogen gamma chain Flags Precursor		Carbamidomethyl+C(8);Carbamidomethyl+C(12)	VAQLEAQCQEPCKDTVQIHDITGK	60	37	10	6	6	10.8522	10.9548	35.9007	0.906966	0.914932	0.279974	2.05932
	6472	P02679	27 453 FIBG HUMAN RecName Full Fibrinogen gamma chain Flags Precursor		None	AIQLTYNPDESSKPNMIDAATLK	58	36	10	6	6	24.8238	23.2218	57.5791	0.608941	0.705178	0.107653	3.56035
	6472	P02679	27 453 FIBG HUMAN RecName Full Fibrinogen gamma chain Flags Precursor		None	DTVQIHDITGK	50	36	10	2	2	13.7009	6.28898	2.33253	1.47712	1.073	0.103826	-
	6472	P02679	27 453 FIBG HUMAN RecName Full Fibrinogen gamma chain Flags Precursor		None	EGFGHLSPTGTTEFWLGNEK	60	37	10	6	6	33.681	6.76937	28.805	0.561395	0.610958	0.171648	1.91665
	6472	P02679	27 453 FIBG HUMAN RecName Full Fibrinogen gamma chain Flags Precursor		None	YEASILTHDSSIR	60	37	10	6	6	16.063	4.01513	36.1437	0.977634	0.976802	0.217866	2.53611
	6472	P02679	27 453 FIBG HUMAN RecName Full Fibrinogen gamma chain Flags Precursor		None	YLQEIYNSNNQK	60	37	10	6	6	13.8591	5.45967	40.4096	0.970893	0.950769	0.187436	2.6545
	protein.key	protein.Accession	protein.Description	protein.Key_ForHomologs	peptide.modification	peptide.seq	All Injections (61)*	Injections Samples (38)*	Injections AV (10)*	Injections IAV (6)*	Injections IRV (7)*	% CV AV #	% CV IAV #	% CV IRV #	% CV RT samples $	% CV RT AV $	% CVRT IAV $	% CV RT IRV $
	965	P02749	20 345 APOH HUMAN RecName Full Beta 2 glycoprotein 1 AltName Full Beta 2 glycoprotein I Short Beta		Carbamidomethyl+C(1);Carbamidomethyl+C(9)	CSYTEDAQCIDGTIEVPK	48	29	7	6	5	17.5125	11.9848	27.3982	0.612936	0.77014	0.113503	1.73449
	965	P02749	20 345 APOH HUMAN RecName Full Beta 2 glycoprotein 1 AltName Full Beta 2 glycoprotein I Short Beta		Carbamidomethyl+C(1)	CPFPSRPDNGFVNYPAKPTLYYK	23	10	6	3	3	89.3629	148.116	91.9209	4.37739	3.08773	11.9103	16.4875
	965	P02749	20 345 APOH HUMAN RecName Full Beta 2 glycoprotein 1 AltName Full Beta 2 glycoprotein I Short Beta		Carbamidomethyl+C(13)	TFYEPGEEITYSCKPGYVSR	25	10	2	6	6	17.4176	43.3753	37.8997	0.898311	0.239775	0.0934893	2.12029
	965	P02749	20 345 APOH HUMAN RecName Full Beta 2 glycoprotein 1 AltName Full Beta 2 glycoprotein I Short Beta		Carbamidomethyl+C(2)	TCPKPDDLPFSTVVPLK	61	38	10	6	6	29.6954	7.05125	34.0041	0.566585	0.647034	0.114346	2.30097
	965	P02749	20 345 APOH HUMAN RecName Full Beta 2 glycoprotein 1 AltName Full Beta 2 glycoprotein I Short Beta		Carbamidomethyl+C(3)	FICPLTGLWPINTLK	33	16	5	6	5	15.0467	6.33281	55.016	0.48528	0.251915	0.0625745	1.66078
	965	P02749	20 345 APOH HUMAN RecName Full Beta 2 glycoprotein 1 AltName Full Beta 2 glycoprotein I Short Beta		Carbamidomethyl+C(5);Carbamidomethyl+C(19)	ATFGCHDGYSLDGPEEIECTK	60	37	10	6	6	18.0532	9.12516	32.391	0.73586	0.764092	0.0929169	2.20312
	965	P02749	20 345 APOH HUMAN RecName Full Beta 2 glycoprotein 1 AltName Full Beta 2 glycoprotein I Short Beta		Carbamidomethyl+C(8);Carbamidomethyl+C(13)	WSPELPVCAPIICPPPSIPTFATLR	60	37	10	6	6	28.8253	9.58901	42.7924	0.384172	0.402517	0.0798166	1.35131
	965	P02749	20 345 APOH HUMAN RecName Full Beta 2 glycoprotein 1 AltName Full Beta 2 glycoprotein I Short Beta		None	ATVVYQGER	61	38	10	6	6	30.0372	6.44902	37.3239	1.47472	1.35587	0.176217	2.6485
	protein.key	protein.Accession	protein.Description	protein.Key_ForHomologs	peptide.modification	peptide.seq	All Injections (61)*	Injections Samples (38)*	Injections AV (10)*	Injections IAV (6)*	Injections IRV (7)*	% CV AV #	% CV IAV #	% CV IRV #	% CV RT samples $	% CV RT AV $	% CVRT IAV $	% CV RT IRV $
	6483	P02751	32 2386 FINC HUMAN RecName Full Fibronectin Short FN AltName Full Cold insoluble globulin Short CI		Carbamidomethyl+C(1);Carbamidomethyl+C(8)	CDPHEATCYDDGK	29	20	9	0	0	42.5437	-	-	9.04431	10.5568	-	-
	6483	P02751	32 2386 FINC HUMAN RecName Full Fibronectin Short FN AltName Full Cold insoluble globulin Short CI		Carbamidomethyl+C(18);Carbamidomethyl+C(20)	IGDTWRRPHETGGYMLECVCLGNGK	19	15	4	0	0	7.81127	-	-	1.14587	0.778729	-	-
	6483	P02751	32 2386 FINC HUMAN RecName Full Fibronectin Short FN AltName Full Cold insoluble globulin Short CI		Carbamidomethyl+C(4);Carbamidomethyl+C(14)	GFNCESKPEAEETCFDK	30	21	9	0	0	17.6064	-	-	0.913245	1.0829	-	-
	6483	P02751	32 2386 FINC HUMAN RecName Full Fibronectin Short FN AltName Full Cold insoluble globulin Short CI		None	DDKESVPISDTIIPAVPPPTDLR	36	26	10	0	0	27.3985	-	-	0.690645	0.862342	-	-
	6483	P02751	32 2386 FINC HUMAN RecName Full Fibronectin Short FN AltName Full Cold insoluble globulin Short CI		None	DLQFVEVTDVK	21	14	7	0	0	39.8666	-	-	0.631382	0.526195	-	-
	6483	P02751	32 2386 FINC HUMAN RecName Full Fibronectin Short FN AltName Full Cold insoluble globulin Short CI		None	EESPLLIGQQSTVSDVPR	28	20	8	0	0	31.6197	-	-	0.471744	0.711679	-	-
	6483	P02751	32 2386 FINC HUMAN RecName Full Fibronectin Short FN AltName Full Cold insoluble globulin Short CI		None	ITYGETGGNSPVQEFTVPGSK	31	23	8	0	0	36.6954	-	-	1.40954	0.730955	-	-
	6483	P02751	32 2386 FINC HUMAN RecName Full Fibronectin Short FN AltName Full Cold insoluble globulin Short CI		None	LTVGLTR	25	20	5	0	0	96.7547	-	-	1.23478	1.78049	-	-
	6483	P02751	32 2386 FINC HUMAN RecName Full Fibronectin Short FN AltName Full Cold insoluble globulin Short CI		None	NLQPASEYTVSLVAIK	34	25	9	0	0	30.4108	-	-	0.517668	0.656694	-	-
	6483	P02751	32 2386 FINC HUMAN RecName Full Fibronectin Short FN AltName Full Cold insoluble globulin Short CI		None	SSPVVIDASTAIDAPSNLR	36	27	9	0	0	39.0138	-	-	0.513736	0.70665	-	-
	6483	P02751	32 2386 FINC HUMAN RecName Full Fibronectin Short FN AltName Full Cold insoluble globulin Short CI		None	VDVIPVNLPGEHGQR	31	22	9	0	0	30.0025	-	-	0.628404	0.826028	-	-
	6483	P02751	32 2386 FINC HUMAN RecName Full Fibronectin Short FN AltName Full Cold insoluble globulin Short CI		None	VVTPLSPPTNLHLEANPDTGVLTVSWER	17	14	3	0	0	6.8799	-	-	0.389032	0.572181	-	-
	6483	P02751	32 2386 FINC HUMAN RecName Full Fibronectin Short FN AltName Full Cold insoluble globulin Short CI		None	WLPSSSPVTGYR	18	14	4	0	0	44.7941	-	-	5.15836	9.25722	-	-
	protein.key	protein.Accession	protein.Description	protein.Key_ForHomologs	peptide.modification	peptide.seq	All Injections (61)*	Injections Samples (38)*	Injections AV (10)*	Injections IAV (6)*	Injections IRV (7)*	% CV AV #	% CV IAV #	% CV IRV #	% CV RT samples $	% CV RT AV $	% CVRT IAV $	% CV RT IRV $
	14493	P02753	19 201 RET4 HUMAN RecName Full Retinol binding protein 4 AltName Full Plasma retinol binding prote		Carbamidomethyl+C(21)	GNDDHWIVDTDYDTYAVQYSCR	16	12	2	0	1	60.9799	-	-	0.712627	1.24987	-	2.87783
	14493	P02753	19 201 RET4 HUMAN RecName Full Retinol binding protein 4 AltName Full Plasma retinol binding prote		Carbamidomethyl+C(5)	QEELCLAR	10	10	0	0	0	-	-	-	1.74583		-	-
	14493	P02753	19 201 RET4 HUMAN RecName Full Retinol binding protein 4 AltName Full Plasma retinol binding prote		Carbamidomethyl+C(8)	LIVHNGYCDGR	2	2	0	0	0	-	-	-	0.95392		-	-
	14493	P02753	19 201 RET4 HUMAN RecName Full Retinol binding protein 4 AltName Full Plasma retinol binding prote		Carbamidomethyl+C(8)	LLNLDGTCADSYSFVFSR	12	10	1	0	1	-	-	-	0.420131		-	-
	14493	P02753	19 201 RET4 HUMAN RecName Full Retinol binding protein 4 AltName Full Plasma retinol binding prote		Carbamidomethyl+C(8)	LLNNWDVCADMVGTFTDTEDPAK	16	14	2	0	0	19.2488	-	-	0.516289	1.00754	-	-
	14493	P02753	19 201 RET4 HUMAN RecName Full Retinol binding protein 4 AltName Full Plasma retinol binding prote		None	DPNGLPPEAQK	6	5	1	0	0	-	-	-	7.35057		-	-
	14493	P02753	19 201 RET4 HUMAN RecName Full Retinol binding protein 4 AltName Full Plasma retinol binding prote		None	FSGTWYAMAKK	5	4	1	0	0	-	-	-	0.186182		-	-
	14493	P02753	19 201 RET4 HUMAN RecName Full Retinol binding protein 4 AltName Full Plasma retinol binding prote		None	VKENFDK	2	0	0	0	1	-	-	-	-		-	4.93665
	14493	P02753	19 201 RET4 HUMAN RecName Full Retinol binding protein 4 AltName Full Plasma retinol binding prote		None	YWGVASFLQK	3	2	0	0	0	-	-	-	1.15296		-	-
	protein.key	protein.Accession	protein.Description	protein.Key_ForHomologs	peptide.modification	peptide.seq	All Injections (61)*	Injections Samples (38)*	Injections AV (10)*	Injections IAV (6)*	Injections IRV (7)*	% CV AV #	% CV IAV #	% CV IRV #	% CV RT samples $	% CV RT AV $	% CVRT IAV $	% CV RT IRV $
	702	P02760	20 352 AMBP HUMAN RecName Full Protein AMBP Contains RecName Full Alpha 1 microglobulin Short Prot		Carbamidomethyl+C(10);Carbamidomethyl+C(18);Carbamidomethyl+C(31);Carbamidomethyl+C(35)	YFYNGTSMACETFQYGGCMGNGNNFVTEKECLQTCR	2	0	0	2	0	-	10.392	-	-		0.0827669	-
	702	P02760	20 352 AMBP HUMAN RecName Full Protein AMBP Contains RecName Full Alpha 1 microglobulin Short Prot		Carbamidomethyl+C(10)	WYNLAIGSTCPWLK	2	0	0	0	1	-	-	-	-		-	2.47814
	702	P02760	20 352 AMBP HUMAN RecName Full Protein AMBP Contains RecName Full Alpha 1 microglobulin Short Prot		Carbamidomethyl+C(10)	WYNLAIGSTCPWLKK	5	1	3	0	1	85.9913	-	-	-	0.328494	-	-
	702	P02760	20 352 AMBP HUMAN RecName Full Protein AMBP Contains RecName Full Alpha 1 microglobulin Short Prot		Carbamidomethyl+C(2);Carbamidomethyl+C(6)	ECLQTCR	9	1	0	2	5	-	1.75444	39.4371	-		0.936402	2.65167
	702	P02760	20 352 AMBP HUMAN RecName Full Protein AMBP Contains RecName Full Alpha 1 microglobulin Short Prot		Carbamidomethyl+C(3)	EYCGVPGDGDEELLR	22	14	8	0	0	28.5167	-	-	0.673466	0.815659	-	-
	702	P02760	20 352 AMBP HUMAN RecName Full Protein AMBP Contains RecName Full Alpha 1 microglobulin Short Prot		Carbamidomethyl+C(3)	GECVPGEQEPEPILIPR	32	16	8	3	4	39.5298	12.1516	22.8752	0.58856	0.664369	0.104908	2.19799
	702	P02760	20 352 AMBP HUMAN RecName Full Protein AMBP Contains RecName Full Alpha 1 microglobulin Short Prot		Carbamidomethyl+C(3)	GVCEETSGAYEK	15	6	3	4	2	48.2721	7.57939	33.9151	1.43269	1.13481	0.120805	1.75073
	702	P02760	20 352 AMBP HUMAN RecName Full Protein AMBP Contains RecName Full Alpha 1 microglobulin Short Prot		Carbamidomethyl+C(4);Carbamidomethyl+C(13)	EDSCQLGYSAGPCMGMTSR	8	1	0	1	5	-	-	66.8849	-		-	10.1383
	702	P02760	20 352 AMBP HUMAN RecName Full Protein AMBP Contains RecName Full Alpha 1 microglobulin Short Prot		Carbamidomethyl+C(5);Carbamidomethyl+C(14)	KEDSCQLGYSAGPCMGMTSR	11	2	2	3	4	1.31499	24.4814	53.6011	1.27678	1.02384	0.0479279	0.967617
	702	P02760	20 352 AMBP HUMAN RecName Full Protein AMBP Contains RecName Full Alpha 1 microglobulin Short Prot		Carbamidomethyl+C(5)	TVAACNLPIVR	43	23	9	5	5	22.9334	7.51005	91.6959	0.97393	2.96714	0.13466	2.55562
	702	P02760	20 352 AMBP HUMAN RecName Full Protein AMBP Contains RecName Full Alpha 1 microglobulin Short Prot		Carbamidomethyl+C(7);Carbamidomethyl+C(11)	FYSEKECREYCGVPGDGDEELLR	19	16	3	0	0	45.197	-	-	13.7257	19.1463	-	-
	702	P02760	20 352 AMBP HUMAN RecName Full Protein AMBP Contains RecName Full Alpha 1 microglobulin Short Prot		None	AFIQLWAFDAVK	12	9	0	1	2	-	-	57.3359	0.29743		-	2.6668
	702	P02760	20 352 AMBP HUMAN RecName Full Protein AMBP Contains RecName Full Alpha 1 microglobulin Short Prot		None	AVLPQEEEGSGGGQLVTEVTK	10	7	3	0	0	89.8948	-	-	1.72347	1.18744	-	-
	702	P02760	20 352 AMBP HUMAN RecName Full Protein AMBP Contains RecName Full Alpha 1 microglobulin Short Prot		None	AVLPQEEEGSGGGQLVTEVTKK	3	0	0	2	1	-	16.19	-	-		1.64643	-
	702	P02760	20 352 AMBP HUMAN RecName Full Protein AMBP Contains RecName Full Alpha 1 microglobulin Short Prot		None	ETLLQDFR	26	14	8	0	4	39.8848	-	21.0359	5.41392	0.65571	-	4.83836
	702	P02760	20 352 AMBP HUMAN RecName Full Protein AMBP Contains RecName Full Alpha 1 microglobulin Short Prot		None	VVAQGVGIPEDSIFTMADR	35	22	7	2	3	25.0975	9.80387	56.9488	0.513325	0.713063	0.204019	1.78841
	702	P02760	20 352 AMBP HUMAN RecName Full Protein AMBP Contains RecName Full Alpha 1 microglobulin Short Prot		None	WNITMESYVVHTNYDEYAIFLTKK	4	2	0	2	0	-	71.3584	-	0.860536		1.11423	-
	protein.key	protein.Accession	protein.Description	protein.Key_ForHomologs	peptide.modification	peptide.seq	All Injections (61)*	Injections Samples (38)*	Injections AV (10)*	Injections IAV (6)*	Injections IRV (7)*	% CV AV #	% CV IAV #	% CV IRV #	% CV RT samples $	% CV RT AV $	% CVRT IAV $	% CV RT IRV $
	156	P02763	19 201 A1AG1 HUMAN RecName Full Alpha 1 acid glycoprotein 1 Short AGP 1 AltName Full Orosomucoid 1		Carbamidomethyl+C(12)	EQLGEFYEALDCLR	61	38	10	6	6	24.8303	3.81138	43.6551	0.435725	0.464857	0.0974593	1.56501
	156	P02763	19 201 A1AG1 HUMAN RecName Full Alpha 1 acid glycoprotein 1 Short AGP 1 AltName Full Orosomucoid 1		None	NWGLSVYADKPETTK	54	38	10	2	4	21.4503	123.337	15.504	0.771885	0.81195	14.5789	0.984124
	156	P02763	19 201 A1AG1 HUMAN RecName Full Alpha 1 acid glycoprotein 1 Short AGP 1 AltName Full Orosomucoid 1		None	SDVVYTDWK	60	38	10	6	5	19.4098	11.6797	45.789	0.864354	0.852194	0.120485	2.61489
	156	P02763	19 201 A1AG1 HUMAN RecName Full Alpha 1 acid glycoprotein 1 Short AGP 1 AltName Full Orosomucoid 1		None	YVGGQEHFAHLLILR	57	35	10	5	6	36.5462	93.102	104.919	0.70459	0.783314	7.11584	4.9696
	156	P02763	19 201 A1AG1 HUMAN RecName Full Alpha 1 acid glycoprotein 1 Short AGP 1 AltName Full Orosomucoid 1	157	None	TEDTIFLR	61	38	10	6	6	21.1235	23.1939	40.5512	0.775322	0.808224	0.116747	2.53988
	protein.key	protein.Accession	protein.Description	protein.Key_ForHomologs	peptide.modification	peptide.seq	All Injections (61)*	Injections Samples (38)*	Injections AV (10)*	Injections IAV (6)*	Injections IRV (7)*	% CV AV #	% CV IAV #	% CV IRV #	% CV RT samples $	% CV RT AV $	% CVRT IAV $	% CV RT IRV $
	6402	P02765	19 367 FETUA HUMAN RecName Full Alpha 2 HS glycoprotein AltName Full Ba alpha 2 glycoprotein AltNa		Carbamidomethyl+C(18)	TVVQPSVGAAAGPVVPPCPGR	61	38	10	6	6	23.2161	4.18901	30.8319	0.780141	0.836443	0.168318	1.95575
	6402	P02765	19 367 FETUA HUMAN RecName Full Alpha 2 HS glycoprotein AltName Full Ba alpha 2 glycoprotein AltNa		Carbamidomethyl+C(21)	AQLVPLPPSTYVEFTVSGTDCVAK	58	38	10	6	3	40.2743	85.4845	67.658	0.537475	0.46697	13.0868	1.31546
	6402	P02765	19 367 FETUA HUMAN RecName Full Alpha 2 HS glycoprotein AltName Full Ba alpha 2 glycoprotein AltNa		Carbamidomethyl+C(22)	VWPQQPSGELFEIEIDTLETTCHVLDPTPVAR	13	6	0	4	2	-	29.9364	2.48846	0.177255		0.0263866	0.117848
	6402	P02765	19 367 FETUA HUMAN RecName Full Alpha 2 HS glycoprotein AltName Full Ba alpha 2 glycoprotein AltNa		Carbamidomethyl+C(8)	EHAVEGDCDFQLLK	61	38	10	6	6	19.3604	5.98435	25.9282	0.772325	0.814571	0.111983	2.48016
	6402	P02765	19 367 FETUA HUMAN RecName Full Alpha 2 HS glycoprotein AltName Full Ba alpha 2 glycoprotein AltNa		None	HTFMGVVSLGSPSGEVSHPR	58	37	10	6	4	44.3627	41.5664	78.417	0.82423	0.912799	0.843916	4.04998
	6402	P02765	19 367 FETUA HUMAN RecName Full Alpha 2 HS glycoprotein AltName Full Ba alpha 2 glycoprotein AltNa		None	HTLNQIDEVK	61	38	10	6	6	24.9156	9.72014	42.7071	1.43788	1.34373	0.123481	2.5081
	protein.key	protein.Accession	protein.Description	protein.Key_ForHomologs	peptide.modification	peptide.seq	All Injections (61)*	Injections Samples (38)*	Injections AV (10)*	Injections IAV (6)*	Injections IRV (7)*	% CV AV #	% CV IAV #	% CV IRV #	% CV RT samples $	% CV RT AV $	% CVRT IAV $	% CV RT IRV $
	658	P02768	19 609 ALBU HUMAN RecName Full Serum albumin Flags Precursor		Carbamidomethyl+C(10)	LVRPEVDVMCTAFHDNEETFLK	61	38	10	6	6	33.1623	18.5471	11.2932	1.08815	0.62541	0.167797	2.3692
	658	P02768	19 609 ALBU HUMAN RecName Full Serum albumin Flags Precursor		Carbamidomethyl+C(3)	QNCELFEQLGEYK	61	38	10	6	6	10.5945	8.07847	30.7026	0.618263	0.604332	0.348962	2.03847
	658	P02768	19 609 ALBU HUMAN RecName Full Serum albumin Flags Precursor		Carbamidomethyl+C(3)	RPCFSALEVDETYVPK	61	38	10	6	6	34.8765	8.4504	24.3274	0.694428	0.741361	0.109368	2.45106
	658	P02768	19 609 ALBU HUMAN RecName Full Serum albumin Flags Precursor		Carbamidomethyl+C(3)	SHCIAEVENDEMPADLPSLAADFVESK	61	38	10	6	6	17.4371	10.3214	36.0474	0.747442	0.705509	0.654623	2.70809
	658	P02768	19 609 ALBU HUMAN RecName Full Serum albumin Flags Precursor		Carbamidomethyl+C(3)	YICENQDSISSK	61	38	10	6	6	22.4411	7.40328	40.5766	1.33915	1.22869	0.885496	2.88599
	658	P02768	19 609 ALBU HUMAN RecName Full Serum albumin Flags Precursor		Carbamidomethyl+C(5);Carbamidomethyl+C(6);Carbamidomethyl+C(13)	VHTECCHGDLLECADDR	61	38	10	6	6	40.684	9.54333	31.3684	1.2892	1.82809	2.60284	4.17907
	658	P02768	19 609 ALBU HUMAN RecName Full Serum albumin Flags Precursor		Carbamidomethyl+C(6);Carbamidomethyl+C(7)	AAFTECCQAADK	61	38	10	6	6	23.1726	4.05144	35.5811	1.56415	1.41846	0.493671	2.60598
	658	P02768	19 609 ALBU HUMAN RecName Full Serum albumin Flags Precursor		None	LVNEVTEFAK	61	38	10	6	6	18.5621	3.94405	22.9183	1.06927	0.776702	0.127557	2.57086
	658	P02768	19 609 ALBU HUMAN RecName Full Serum albumin Flags Precursor		None	VFDEFKPLVEEPQNLIK	61	38	10	6	6	26.1834	5.12093	24.9898	0.576231	0.61741	0.116208	1.63271
	protein.key	protein.Accession	protein.Description	protein.Key_ForHomologs	peptide.modification	peptide.seq	All Injections (61)*	Injections Samples (38)*	Injections AV (10)*	Injections IAV (6)*	Injections IRV (7)*	% CV AV #	% CV IAV #	% CV IRV #	% CV RT samples $	% CV RT AV $	% CVRT IAV $	% CV RT IRV $
	18849	P02774	17 474 VTDB HUMAN RecName Full Vitamin D binding protein Short DBP Short VDB AltName Full Group sp		Carbamidomethyl+C(18)	HQPQEFPTYVEPTNDEICEAFR	61	38	10	6	6	34.6323	7.6898	19.3563	0.552524	0.609078	0.127834	1.99843
	18849	P02774	17 474 VTDB HUMAN RecName Full Vitamin D binding protein Short DBP Short VDB AltName Full Group sp		Carbamidomethyl+C(2);Carbamidomethyl+C(17);Carbamidomethyl+C(18)	SCESNSPFPVHPGTAECCTK	61	38	10	6	6	14.5963	3.79658	43.2258	0.992049	1.02382	0.202611	2.41957
	18849	P02774	17 474 VTDB HUMAN RecName Full Vitamin D binding protein Short DBP Short VDB AltName Full Group sp		Carbamidomethyl+C(5);Carbamidomethyl+C(6);Carbamidomethyl+C(14)	SLGECCDVEDSTTCFNAK	60	37	10	6	6	11.2324	3.63693	36.9011	0.83922	0.836452	0.214004	1.97735
	18849	P02774	17 474 VTDB HUMAN RecName Full Vitamin D binding protein Short DBP Short VDB AltName Full Group sp		Carbamidomethyl+C(9);Carbamidomethyl+C(10);Carbamidomethyl+C(18)	EVVSLTEACCAEGADPDCYDTR	61	38	10	6	6	15.403	6.36113	35.8884	0.695781	0.704586	0.104093	1.74686
	18849	P02774	17 474 VTDB HUMAN RecName Full Vitamin D binding protein Short DBP Short VDB AltName Full Group sp		None	VPTADLEDVLPLAEDITNILSK	51	38	0	6	6	-	9.04521	45.3963	0.277953		0.0219459	1.19587
	protein.key	protein.Accession	protein.Description	protein.Key_ForHomologs	peptide.modification	peptide.seq	All Injections (61)*	Injections Samples (38)*	Injections AV (10)*	Injections IAV (6)*	Injections IRV (7)*	% CV AV #	% CV IAV #	% CV IRV #	% CV RT samples $	% CV RT AV $	% CVRT IAV $	% CV RT IRV $
	17951	P02787	20 698 TRFE HUMAN RecName Full Serotransferrin Short Transferrin AltName Full Siderophilin AltName		Carbamidomethyl+C(12)	SVIPSDGPSVACVK	61	38	10	6	6	15.0864	6.62507	33.1085	0.884479	0.919422	0.204207	2.1922
	17951	P02787	20 698 TRFE HUMAN RecName Full Serotransferrin Short Transferrin AltName Full Siderophilin AltName		Carbamidomethyl+C(13)	SAGWNIPIGLLYCDLPEPR	61	38	10	6	6	24.3723	7.44665	21.5407	0.372316	0.395371	0.0794226	1.42801
	17951	P02787	20 698 TRFE HUMAN RecName Full Serotransferrin Short Transferrin AltName Full Siderophilin AltName		Carbamidomethyl+C(2)	DCHLAQVPSHTVVAR	61	38	10	6	6	18.1748	19.3896	33.6577	1.16955	1.16982	0.145772	2.47004
	17951	P02787	20 698 TRFE HUMAN RecName Full Serotransferrin Short Transferrin AltName Full Siderophilin AltName		Carbamidomethyl+C(3);Carbamidomethyl+C(12)	IECVSAETTEDCIAK	61	38	10	6	6	14.2382	8.41807	38.6631	0.940965	0.940176	0.203627	1.96301
	17951	P02787	20 698 TRFE HUMAN RecName Full Serotransferrin Short Transferrin AltName Full Siderophilin AltName		Carbamidomethyl+C(4);Carbamidomethyl+C(12)	EGTCPEAPTDECKPVK	61	38	10	6	6	25.2174	7.37027	39.0681	1.41161	1.32805	0.184221	2.16661
	17951	P02787	20 698 TRFE HUMAN RecName Full Serotransferrin Short Transferrin AltName Full Siderophilin AltName		Carbamidomethyl+C(4)	SDNCEDTPEAGYFAVAVVK	61	38	10	6	6	33.0907	12.3539	50.8798	0.57739	0.635863	0.24002	1.99105
	17951	P02787	20 698 TRFE HUMAN RecName Full Serotransferrin Short Transferrin AltName Full Siderophilin AltName		Carbamidomethyl+C(6)	DYELLCLDGTR	57	38	10	2	6	34.5184	133.432	6.08627	0.547741	0.591065	0.127891	2.00256
	17951	P02787	20 698 TRFE HUMAN RecName Full Serotransferrin Short Transferrin AltName Full Siderophilin AltName		Carbamidomethyl+C(9)	FDEFFSEGCAPGSK	61	38	10	6	6	34.0906	7.41679	28.994	0.647168	0.673749	0.106466	2.24353
	17951	P02787	20 698 TRFE HUMAN RecName Full Serotransferrin Short Transferrin AltName Full Siderophilin AltName		Carbamidomethyl+C(9)	KPVDEYKDCHLAQVPSHTVVAR	52	33	10	3	5	16.6319	80.8503	88.3692	1.1151	1.11125	7.43576	3.60142
	17951	P02787	20 698 TRFE HUMAN RecName Full Serotransferrin Short Transferrin AltName Full Siderophilin AltName		None	HSTIFENLANK	61	38	10	6	6	17.2238	31.635	34.2161	0.998937	1.01032	0.295333	2.81241
	protein.key	protein.Accession	protein.Description	protein.Key_ForHomologs	peptide.modification	peptide.seq	All Injections (61)*	Injections Samples (38)*	Injections AV (10)*	Injections IAV (6)*	Injections IRV (7)*	% CV AV #	% CV IAV #	% CV IRV #	% CV RT samples $	% CV RT AV $	% CVRT IAV $	% CV RT IRV $
	7810	P02790	24 462 HEMO HUMAN RecName Full Hemopexin AltName Full Beta 1B glycoprotein Flags Precursor		Carbamidomethyl+C(19)	EVGTPHGIILDSVDAAFICPGSSR	61	38	10	6	6	28.3124	14.2643	25.2019	0.493225	0.560727	0.106052	1.84585
	7810	P02790	24 462 HEMO HUMAN RecName Full Hemopexin AltName Full Beta 1B glycoprotein Flags Precursor		Carbamidomethyl+C(19)	LLQDEFPGIPSPLDAAVECHR	61	38	10	6	6	26.0961	6.32408	27.8044	0.480052	0.553474	0.102892	1.78103
	7810	P02790	24 462 HEMO HUMAN RecName Full Hemopexin AltName Full Beta 1B glycoprotein Flags Precursor		Carbamidomethyl+C(3)	YYCFQGNQFLR	61	38	10	6	6	29.8594	5.92794	11.5657	0.627323	0.658181	0.111077	2.00583
	7810	P02790	24 462 HEMO HUMAN RecName Full Hemopexin AltName Full Beta 1B glycoprotein Flags Precursor		None	NFPSPVDAAFR	61	38	10	6	6	30.2348	4.61815	27.7215	0.625242	0.682287	0.11161	2.1316
	7810	P02790	24 462 HEMO HUMAN RecName Full Hemopexin AltName Full Beta 1B glycoprotein Flags Precursor		None	SGAQATWTELPWPHEK	61	38	10	6	6	37.4199	8.83325	32.1081	0.625762	0.637573	0.131083	2.45606
	protein.key	protein.Accession	protein.Description	protein.Key_ForHomologs	peptide.modification	peptide.seq	All Injections (61)*	Injections Samples (38)*	Injections AV (10)*	Injections IAV (6)*	Injections IRV (7)*	% CV AV #	% CV IAV #	% CV IRV #	% CV RT samples $	% CV RT AV $	% CVRT IAV $	% CV RT IRV $
	1857	P04003	49 597 C4BPA HUMAN RecName Full C4b binding protein alpha chain Short C4bp AltName Full Proline ri		Carbamidomethyl+C(1);Carbamidomethyl+C(17)	CHPGYKPTTDEPTTVICQK	31	18	2	5	5	7.77536	40.3541	23.6819	1.23807	0.196863	1.21264	2.76884
	1857	P04003	49 597 C4BPA HUMAN RecName Full C4b binding protein alpha chain Short C4bp AltName Full Proline ri		Carbamidomethyl+C(11)	GVGWSHPLPQCEIVK	53	31	9	6	6	19.3605	7.63885	33.3644	0.678946	0.721368	0.106755	2.42966
	1857	P04003	49 597 C4BPA HUMAN RecName Full C4b binding protein alpha chain Short C4bp AltName Full Proline ri		Carbamidomethyl+C(16)	QSSSYSFFKEEIIYECDK	54	35	8	6	4	99.8899	81.6948	129.881	9.36119	7.77013	5.5744	2.49309
	1857	P04003	49 597 C4BPA HUMAN RecName Full C4b binding protein alpha chain Short C4bp AltName Full Proline ri		Carbamidomethyl+C(2)	NCGPPPTLSFAAPMDITLTETR	40	24	6	5	5	30.0807	49.9999	36.8021	0.456841	0.368609	5.39758	1.5833
	1857	P04003	49 597 C4BPA HUMAN RecName Full C4b binding protein alpha chain Short C4bp AltName Full Proline ri		Carbamidomethyl+C(3);Carbamidomethyl+C(15)	LSCSYSHWSAPAPQCK	49	31	8	4	5	19.1758	4.86702	33.9206	3.96301	0.901367	0.288491	2.37918
	1857	P04003	49 597 C4BPA HUMAN RecName Full C4b binding protein alpha chain Short C4bp AltName Full Proline ri		Carbamidomethyl+C(3)	YTCLPGYVR	33	16	6	5	5	17.7058	11.4622	26.8407	1.09844	1.04235	0.210465	2.06905
	1857	P04003	49 597 C4BPA HUMAN RecName Full C4b binding protein alpha chain Short C4bp AltName Full Proline ri		Carbamidomethyl+C(5)	FSAICQGDGTWSPR	55	32	10	6	6	18.1284	6.04491	35.6475	0.741639	0.766193	0.105234	2.20227
	1857	P04003	49 597 C4BPA HUMAN RecName Full C4b binding protein alpha chain Short C4bp AltName Full Proline ri		Carbamidomethyl+C(7);Carbamidomethyl+C(11);Carbamidomethyl+C(12)	WTPYQGCEALCCPEPK	59	37	10	5	6	27.5905	27.5791	31.6298	6.58982	0.706589	7.88463	1.95194
	1857	P04003	49 597 C4BPA HUMAN RecName Full C4b binding protein alpha chain Short C4bp AltName Full Proline ri		Carbamidomethyl+C(7)	GSSVIHCDADSK	25	9	5	4	6	30.3724	6.01676	52.5748	12.5264	1.20272	0.760281	2.61295
	1857	P04003	49 597 C4BPA HUMAN RecName Full C4b binding protein alpha chain Short C4bp AltName Full Proline ri		None	EDVYVVGTVLR	61	38	10	6	6	32.1064	17.6516	42.5446	0.641014	0.722092	0.113574	2.14146
	1857	P04003	49 597 C4BPA HUMAN RecName Full C4b binding protein alpha chain Short C4bp AltName Full Proline ri		None	KPDVSHGEMVSGFGPIYNYK	48	33	8	2	4	30.6613	4.04372	40.3512	0.672649	0.839219	0.0617008	3.19567
	1857	P04003	49 597 C4BPA HUMAN RecName Full C4b binding protein alpha chain Short C4bp AltName Full Proline ri		None	TWYPEVPK	33	20	7	1	4	22.7554	-	65.0679	0.716377	0.757387	-	12.6479
	protein.key	protein.Accession	protein.Description	protein.Key_ForHomologs	peptide.modification	peptide.seq	All Injections (61)*	Injections Samples (38)*	Injections AV (10)*	Injections IAV (6)*	Injections IRV (7)*	% CV AV #	% CV IAV #	% CV IRV #	% CV RT samples $	% CV RT AV $	% CVRT IAV $	% CV RT IRV $
	18855	P04004	20 478 VTNC HUMAN RecName Full Vitronectin AltName Full Serum spreading factor Short S protein Alt		Carbamidomethyl+C(4)	GQYCYELDEK	52	30	9	6	6	16.5646	8.73165	59.0394	0.984289	0.983721	0.193476	4.61272
	18855	P04004	20 478 VTNC HUMAN RecName Full Vitronectin AltName Full Serum spreading factor Short S protein Alt		Carbamidomethyl+C(9)	SIAQYWLGCPAPGHL	51	31	9	6	4	23.4537	6.16225	58.107	0.607541	0.551775	0.102142	1.39496
	18855	P04004	20 478 VTNC HUMAN RecName Full Vitronectin AltName Full Serum spreading factor Short S protein Alt		None	DVWGIEGPIDAAFTR	57	34	10	6	6	25.9929	6.26754	22.7014	0.408857	0.444297	0.0836355	1.60198
	18855	P04004	20 478 VTNC HUMAN RecName Full Vitronectin AltName Full Serum spreading factor Short S protein Alt		None	DWHGVPGQVDAAMAGR	47	29	9	3	5	18.1955	4.61021	39.901	0.660721	0.757771	0.0592452	2.0395
	18855	P04004	20 478 VTNC HUMAN RecName Full Vitronectin AltName Full Serum spreading factor Short S protein Alt		None	FEDGVLDPDYPR	24	11	3	4	5	122.486	3.84107	29.7859	7.09145	9.40906	0.11849	1.72979
	18855	P04004	20 478 VTNC HUMAN RecName Full Vitronectin AltName Full Serum spreading factor Short S protein Alt		None	QPQFISR	14	10	1	0	3	-	-	24.997	1.69761		-	1.06177
	protein.key	protein.Accession	protein.Description	protein.Key_ForHomologs	peptide.modification	peptide.seq	All Injections (61)*	Injections Samples (38)*	Injections AV (10)*	Injections IAV (6)*	Injections IRV (7)*	% CV AV #	% CV IAV #	% CV IRV #	% CV RT samples $	% CV RT AV $	% CVRT IAV $	% CV RT IRV $
	957	P04114	28 4563 APOB HUMAN RecName Full Apolipoprotein B 100 Short Apo B 100 Contains RecName Full Apolipo		None	AASGTTGTYQEWK	48	31	9	4	4	186.403	66.7934	68.5416	13.133	14.6127	4.02326	15.5044
	957	P04114	28 4563 APOB HUMAN RecName Full Apolipoprotein B 100 Short Apo B 100 Contains RecName Full Apolipo		None	ADSVVDLLSYNVQGSGETTYDHK	52	35	10	3	4	29.673	8.63526	17.528	0.568693	0.587309	0.116305	1.7421
	957	P04114	28 4563 APOB HUMAN RecName Full Apolipoprotein B 100 Short Apo B 100 Contains RecName Full Apolipo		None	ATFQTPDFIVPLTDLR	59	38	10	6	5	23.5289	11.9234	8.2682	0.414352	0.450189	0.0818404	1.56654
	957	P04114	28 4563 APOB HUMAN RecName Full Apolipoprotein B 100 Short Apo B 100 Contains RecName Full Apolipo		None	EALKESQLPTVMDFR	17	13	4	0	0	30.3214	-	-	8.8741	0.758634	-	-
	957	P04114	28 4563 APOB HUMAN RecName Full Apolipoprotein B 100 Short Apo B 100 Contains RecName Full Apolipo		None	EEYFDPSIVGWTVK	11	9	0	1	1	-	-	-	2.25454		-	-
	957	P04114	28 4563 APOB HUMAN RecName Full Apolipoprotein B 100 Short Apo B 100 Contains RecName Full Apolipo		None	FSVPAGIVIPSFQALTAR	35	20	6	2	6	21.3531	0	35.0005	0.393902	0.466014	0.0895747	1.49562
	957	P04114	28 4563 APOB HUMAN RecName Full Apolipoprotein B 100 Short Apo B 100 Contains RecName Full Apolipo		None	GIISALLVPPETEEAK	57	36	10	5	5	26.0113	10.8472	36.4207	0.524884	0.599729	0.108156	1.76822
	957	P04114	28 4563 APOB HUMAN RecName Full Apolipoprotein B 100 Short Apo B 100 Contains RecName Full Apolipo		None	GISTSAASPAVGTVGMDMDEDDDFSK	35	26	6	0	3	41.7653	-	118.517	6.88177	7.55851	-	24.4685
	957	P04114	28 4563 APOB HUMAN RecName Full Apolipoprotein B 100 Short Apo B 100 Contains RecName Full Apolipo		None	IADFELPTIIVPEQTIEIPSIK	61	38	10	6	6	26.7717	6.67229	24.0758	0.372094	0.398108	0.0782204	1.33845
	957	P04114	28 4563 APOB HUMAN RecName Full Apolipoprotein B 100 Short Apo B 100 Contains RecName Full Apolipo		None	ILGEELGFASLHDLQLLGK	38	26	2	4	5	19.0319	10.3062	35.8556	0.336729	0.0572201	0.558112	2.92303
	957	P04114	28 4563 APOB HUMAN RecName Full Apolipoprotein B 100 Short Apo B 100 Contains RecName Full Apolipo		None	ITENDIQIALDDAK	50	31	9	4	5	30.1713	9.99255	14.4077	1.29387	6.29347	0.0869204	1.86448
	957	P04114	28 4563 APOB HUMAN RecName Full Apolipoprotein B 100 Short Apo B 100 Contains RecName Full Apolipo		None	IVQILPWEQNEQVK	52	37	9	3	2	34.7516	5.9566	16.188	0.555511	0.61867	0.101063	20.8462
	957	P04114	28 4563 APOB HUMAN RecName Full Apolipoprotein B 100 Short Apo B 100 Contains RecName Full Apolipo		None	LEIQSQVDSQHVGHSVLTAK	56	35	10	5	5	11.5914	15.2302	37.8216	0.955268	0.96587	0.368502	1.93017
	957	P04114	28 4563 APOB HUMAN RecName Full Apolipoprotein B 100 Short Apo B 100 Contains RecName Full Apolipo		None	LLSGGNTLHLVSTTK	27	17	4	1	4	12.367	-	72.7969	0.803556	0.791297	-	2.73925
	957	P04114	28 4563 APOB HUMAN RecName Full Apolipoprotein B 100 Short Apo B 100 Contains RecName Full Apolipo		None	LSNDMMGSYAEMK	22	16	5	0	1	16.1413	-	-	0.975611	0.886605	-	-
	957	P04114	28 4563 APOB HUMAN RecName Full Apolipoprotein B 100 Short Apo B 100 Contains RecName Full Apolipo		None	QVFLYPEKDEPTYILNIK	9	3	0	0	5	-	-	11.2262	0.487797		-	1.9797
	957	P04114	28 4563 APOB HUMAN RecName Full Apolipoprotein B 100 Short Apo B 100 Contains RecName Full Apolipo		None	TEVIPPLIENR	56	35	9	6	6	39.7956	6.50475	24.8884	0.651617	0.645187	0.112831	1.98072
	957	P04114	28 4563 APOB HUMAN RecName Full Apolipoprotein B 100 Short Apo B 100 Contains RecName Full Apolipo		None	TLADLTLLDSPIK	61	38	10	6	6	27.2354	11.1135	23.9305	0.483642	0.543395	0.0981395	1.70799
	957	P04114	28 4563 APOB HUMAN RecName Full Apolipoprotein B 100 Short Apo B 100 Contains RecName Full Apolipo		None	VEDIPLAR	16	12	3	1	0	16.9144	-	-	0.962161	0.99617	-	-
	957	P04114	28 4563 APOB HUMAN RecName Full Apolipoprotein B 100 Short Apo B 100 Contains RecName Full Apolipo		None	VNWEEEAASGLLTSLK	60	37	10	6	6	24.9556	12.921	13.4803	0.444273	0.447455	0.0924278	1.59072
	957	P04114	28 4563 APOB HUMAN RecName Full Apolipoprotein B 100 Short Apo B 100 Contains RecName Full Apolipo		None	VPSYTLILPSLELPVLHVPR	43	28	2	6	6	3.11912	8.69046	35.6874	0.39898	0.258276	0.188967	1.76796
	957	P04114	28 4563 APOB HUMAN RecName Full Apolipoprotein B 100 Short Apo B 100 Contains RecName Full Apolipo		None	VSALLTPAEQTGTWK	58	37	10	4	6	34.7772	77.5083	33.6118	0.68777	0.721248	6.09484	2.10891
	957	P04114	28 4563 APOB HUMAN RecName Full Apolipoprotein B 100 Short Apo B 100 Contains RecName Full Apolipo		None	YSQPEDSLIPFFEITVPESQLTVSQFTLPK	12	2	0	5	5	-	7.12478	42.3671	0.321443		0.0683502	0.316417
	protein.key	protein.Accession	protein.Description	protein.Key_ForHomologs	peptide.modification	peptide.seq	All Injections (61)*	Injections Samples (38)*	Injections AV (10)*	Injections IAV (6)*	Injections IRV (7)*	% CV AV #	% CV IAV #	% CV IRV #	% CV RT samples $	% CV RT AV $	% CVRT IAV $	% CV RT IRV $
	8015	P04196	19 525 HRG HUMAN RecName Full Histidine rich glycoprotein AltName Full Histidine proline rich glyc		Carbamidomethyl+C(10)	RPSEIVIGQCK	48	31	6	4	6	25.9494	9.94008	44.3567	4.81148	0.949839	0.139532	2.75945
	8015	P04196	19 525 HRG HUMAN RecName Full Histidine rich glycoprotein AltName Full Histidine proline rich glyc		Carbamidomethyl+C(18)	HPLKPDNQPFPQSVSESCPGK	17	15	2	0	0	36.1507	-	-	4.63587	1.28227	-	-
	8015	P04196	19 525 HRG HUMAN RecName Full Histidine rich glycoprotein AltName Full Histidine proline rich glyc		Carbamidomethyl+C(6)	VSPTDCSAVEPEAEK	50	33	9	3	4	31.5463	70.2579	18.9462	16.7578	9.0542	3.62773	1.69481
	8015	P04196	19 525 HRG HUMAN RecName Full Histidine rich glycoprotein AltName Full Histidine proline rich glyc		None	ADLFYDVEALDLESPK	60	37	10	6	6	27.963	9.63901	46.0533	0.452039	0.444432	0.0922633	1.52997
	8015	P04196	19 525 HRG HUMAN RecName Full Histidine rich glycoprotein AltName Full Histidine proline rich glyc		None	DGYLFQLLR	56	36	9	6	4	19.488	12.6608	19.8866	0.437368	0.485424	0.0853576	1.68644
	8015	P04196	19 525 HRG HUMAN RecName Full Histidine rich glycoprotein AltName Full Histidine proline rich glyc		None	DSPVLIDFFEDTER	28	14	1	6	6	-	8.32783	34.2919	0.329234		0.0781073	1.50516
	8015	P04196	19 525 HRG HUMAN RecName Full Histidine rich glycoprotein AltName Full Histidine proline rich glyc		None	GGEGTGYFVDFSVR	51	34	10	3	3	30.9882	18.0633	53.4295	0.91061	0.586955	0.0668527	2.21651
	8015	P04196	19 525 HRG HUMAN RecName Full Histidine rich glycoprotein AltName Full Histidine proline rich glyc		None	SGFPQVSMFFTHTFPK	33	20	5	3	5	28.1579	15.6102	54.2329	9.37114	0.463116	5.18045	1.91246
	8015	P04196	19 525 HRG HUMAN RecName Full Histidine rich glycoprotein AltName Full Histidine proline rich glyc		None	YKEENDDFASFR	52	33	10	4	4	17.2105	2.19958	51.4643	0.875868	0.948379	0.260662	2.43683
	protein.key	protein.Accession	protein.Description	protein.Key_ForHomologs	peptide.modification	peptide.seq	All Injections (61)*	Injections Samples (38)*	Injections AV (10)*	Injections IAV (6)*	Injections IRV (7)*	% CV AV #	% CV IAV #	% CV IRV #	% CV RT samples $	% CV RT AV $	% CVRT IAV $	% CV RT IRV $
	9549	P04207	21 129 KV308 HUMAN RecName Full Ig kappa chain V III region CLL AltName Full Rheumatoid factor Fla		Carbamidomethyl+C(27)	FSGSGSGTEFTLTISRLQSEDFAVYYCQQYNNWPPWTFGQGTR	1	0	0	1	0	-	-	-	-		-	-
	9549	P04207	21 129 KV308 HUMAN RecName Full Ig kappa chain V III region CLL AltName Full Rheumatoid factor Fla		None	EIVMTQSPATLSVSPGER	27	20	4	1	2	17.4619	-	3.41496	0.671802	0.198725	-	0.0418312
	9549	P04207	21 129 KV308 HUMAN RecName Full Ig kappa chain V III region CLL AltName Full Rheumatoid factor Fla		None	FSGSGSGTEFTLTISR	14	10	3	0	1	58.6556	-	-	8.6831	0.688994	-	-
	9549	P04207	21 129 KV308 HUMAN RecName Full Ig kappa chain V III region CLL AltName Full Rheumatoid factor Fla		None	LLIYGASTR	21	17	3	0	1	16.8264	-	-	1.1099	0.363712	-	-
	9549	P04207	21 129 KV308 HUMAN RecName Full Ig kappa chain V III region CLL AltName Full Rheumatoid factor Fla	9550	None	ATGIPAR	11	5	3	1	2	34.7657	-	15.8495	0.892546	0.397884	-	0.498481
	9549	P04207	21 129 KV308 HUMAN RecName Full Ig kappa chain V III region CLL AltName Full Rheumatoid factor Fla	9550	None	TGIPAR	2	0	0	1	1	-	-	-	-		-	-
	protein.key	protein.Accession	protein.Description	protein.Key_ForHomologs	peptide.modification	peptide.seq	All Injections (61)*	Injections Samples (38)*	Injections AV (10)*	Injections IAV (6)*	Injections IRV (7)*	% CV AV #	% CV IAV #	% CV IRV #	% CV RT samples $	% CV RT AV $	% CVRT IAV $	% CV RT IRV $
	10101	P04208	LV106 HUMAN RecName Full Ig lambda chain V I region WAH		Carbamidomethyl+C(5)	VTISCFGSSSNIGR	2	2	0	0	0	-	-	-	0.263227		-	-
	10101	P04208	LV106 HUMAN RecName Full Ig lambda chain V I region WAH		None	DNQRPSGVPDR	3	0	1	2	0	-	11.3992	-	-		0.324074	-
	10101	P04208	LV106 HUMAN RecName Full Ig lambda chain V I region WAH		None	FSGSKSGTSASLAISGLR	1	0	1	0	0	-	-	-	-		-	-
	10101	P04208	LV106 HUMAN RecName Full Ig lambda chain V I region WAH		None	LIYK	4	0	0	2	1	-	3.01725	-	-		0.375945	0.301934
	10101	P04208	LV106 HUMAN RecName Full Ig lambda chain V I region WAH		None	LLIYK	5	1	0	2	1	-	8.72875	-	-		0.38022	0.304793
	10101	P04208	LV106 HUMAN RecName Full Ig lambda chain V I region WAH		None	LLIYKDNQRPSGVPDR	3	2	0	1	0	-	-	-	0.176202		-	-
	10101	P04208	LV106 HUMAN RecName Full Ig lambda chain V I region WAH		None	PDR	1	0	1	0	0	-	-	-	-		-	-
	10101	P04208	LV106 HUMAN RecName Full Ig lambda chain V I region WAH		None	QSVLTQPPSASGTPGQR	2	1	0	0	1	-	-	-	-		-	-
	10101	P04208	LV106 HUMAN RecName Full Ig lambda chain V I region WAH		None	SGTSASLAISGLR	29	21	4	2	1	14.3893	2.49297	-	0.655596	1.17769	0.116414	0.276991
	10101	P04208	LV106 HUMAN RecName Full Ig lambda chain V I region WAH	10097	None	SGTSASLAISGLR	1	0	0	1	0	-	-	-	-		-	-
	protein.key	protein.Accession	protein.Description	protein.Key_ForHomologs	peptide.modification	peptide.seq	All Injections (61)*	Injections Samples (38)*	Injections AV (10)*	Injections IAV (6)*	Injections IRV (7)*	% CV AV #	% CV IAV #	% CV IRV #	% CV RT samples $	% CV RT AV $	% CVRT IAV $	% CV RT IRV $
	160	P04217	22 495 A1BG HUMAN RecName Full Alpha 1B glycoprotein AltName Full Alpha 1 B glycoprotein Flags Pr		Carbamidomethyl+C(1)	CEGPIPDVTFELLR	48	31	4	6	6	21.7184	11.5955	44.6273	0.488314	0.421493	0.0863843	1.71363
	160	P04217	22 495 A1BG HUMAN RecName Full Alpha 1B glycoprotein AltName Full Alpha 1 B glycoprotein Flags Pr		Carbamidomethyl+C(5)	VTLTCVAPLSGVDFQLR	61	38	10	6	6	20.2454	5.07597	24.1383	0.464419	0.522376	0.0995295	1.58475
	160	P04217	22 495 A1BG HUMAN RecName Full Alpha 1B glycoprotein AltName Full Alpha 1 B glycoprotein Flags Pr		None	ATWSGAVLAGR	48	28	7	6	6	22.906	8.10079	41.1859	0.837398	0.956606	0.109769	2.39545
	160	P04217	22 495 A1BG HUMAN RecName Full Alpha 1B glycoprotein AltName Full Alpha 1 B glycoprotein Flags Pr		None	HQFLLTGDTQGR	59	37	10	6	5	22.992	7.0152	44.8648	0.989854	1.04797	0.654795	3.322
	160	P04217	22 495 A1BG HUMAN RecName Full Alpha 1B glycoprotein AltName Full Alpha 1 B glycoprotein Flags Pr		None	LETPDFQLFK	50	29	9	6	5	30.5472	7.26064	15.9627	0.48525	0.526352	0.0986489	2.06172
	160	P04217	22 495 A1BG HUMAN RecName Full Alpha 1B glycoprotein AltName Full Alpha 1 B glycoprotein Flags Pr		None	LLELTGPK	51	37	10	0	4	17.1451	-	6.10486	0.896509	0.933909	-	0.935694
	160	P04217	22 495 A1BG HUMAN RecName Full Alpha 1B glycoprotein AltName Full Alpha 1 B glycoprotein Flags Pr		None	SGLSTGWTQLSK	26	12	2	5	6	15.6639	1.6044	34.4927	0.606042	0.478269	0.129564	2.30482
	160	P04217	22 495 A1BG HUMAN RecName Full Alpha 1B glycoprotein AltName Full Alpha 1 B glycoprotein Flags Pr		None	SLPAPWLSMAPVSWITPGLK	12	2	0	5	4	-	13.809	45.1514	13.5194		0.0716459	1.27474
	160	P04217	22 495 A1BG HUMAN RecName Full Alpha 1B glycoprotein AltName Full Alpha 1 B glycoprotein Flags Pr		None	SWVPHTFESELSDPVELLVAES	32	24	1	5	2	-	52.0026	17.0093	2.2147		1.66498	-
	160	P04217	22 495 A1BG HUMAN RecName Full Alpha 1B glycoprotein AltName Full Alpha 1 B glycoprotein Flags Pr		None	TDGEGALSEPSATVTIEELAAPPPPVLMHHGESSQVLHPGNK	41	29	9	1	2	37.9409	-	12.4866	0.622918	0.674617	-	0.112672
	160	P04217	22 495 A1BG HUMAN RecName Full Alpha 1B glycoprotein AltName Full Alpha 1 B glycoprotein Flags Pr		None	TPGAAANLELIFVGPQHAGNYR	43	33	7	2	1	20.3339	109.29	-	0.562333	0.634317	9.45355	-
	protein.key	protein.Accession	protein.Description	protein.Key_ForHomologs	peptide.modification	peptide.seq	All Injections (61)*	Injections Samples (38)*	Injections AV (10)*	Injections IAV (6)*	Injections IRV (7)*	% CV AV #	% CV IAV #	% CV IRV #	% CV RT samples $	% CV RT AV $	% CVRT IAV $	% CV RT IRV $
	9550	P04433	21 115 KV309 HUMAN RecName Full Ig kappa chain V III region VG Flags Precursor Fragment		Carbamidomethyl+C(27)	FSGSGSGTDFTLTISSLEPEDFAVYYCQQR	4	1	0	3	0	-	11.6956	-	-		0.0826556	-
	9550	P04433	21 115 KV309 HUMAN RecName Full Ig kappa chain V III region VG Flags Precursor Fragment		None	ASQSVSSYLAWYQQKPGQAPR	8	1	0	3	4	-	11.031	57.2468	-		0.0903276	4.23614
	9550	P04433	21 115 KV309 HUMAN RecName Full Ig kappa chain V III region VG Flags Precursor Fragment		None	ATGIPAR	14	5	2	4	3	50.3411	9.76544	76.4319	1.62847	1.78932	0.584332	0.0736594
	9550	P04433	21 115 KV309 HUMAN RecName Full Ig kappa chain V III region VG Flags Precursor Fragment		None	EIVLTQSPATLSLSPGER	58	36	10	5	6	33.5109	6.80464	54.103	0.621299	0.652288	0.131697	1.69801
	9550	P04433	21 115 KV309 HUMAN RecName Full Ig kappa chain V III region VG Flags Precursor Fragment		None	GIPAR	6	2	2	1	1	54.7715	-	-	2.53081	1.78886	-	-
	9550	P04433	21 115 KV309 HUMAN RecName Full Ig kappa chain V III region VG Flags Precursor Fragment		None	IYDASNR	3	1	0	0	2	-	-	10.6646	-		-	0.00956508
	9550	P04433	21 115 KV309 HUMAN RecName Full Ig kappa chain V III region VG Flags Precursor Fragment		None	LLIYDASNR	41	24	8	2	6	19.1985	36.4278	35.3671	0.980182	1.16776	1.09518	2.60387
	9550	P04433	21 115 KV309 HUMAN RecName Full Ig kappa chain V III region VG Flags Precursor Fragment		None	TGIPAR	4	0	0	4	0	-	14.6446	-	-		0.588023	-
	9550	P04433	21 115 KV309 HUMAN RecName Full Ig kappa chain V III region VG Flags Precursor Fragment	9549	None	ATGIPAR	11	5	3	1	2	19.1247	-	42.128	0.892546	0.397884	-	0.498481
	9550	P04433	21 115 KV309 HUMAN RecName Full Ig kappa chain V III region VG Flags Precursor Fragment	9553 9554	Carbamidomethyl+C(5)	ATLSCR	2	0	0	0	1	-	-	-	-		-	0.289807
	protein.key	protein.Accession	protein.Description	protein.Key_ForHomologs	peptide.modification	peptide.seq	All Injections (61)*	Injections Samples (38)*	Injections AV (10)*	Injections IAV (6)*	Injections IRV (7)*	% CV AV #	% CV IAV #	% CV IRV #	% CV RT samples $	% CV RT AV $	% CVRT IAV $	% CV RT IRV $
	962	P05090	21 189 APOD HUMAN RecName Full Apolipoprotein D Short Apo D Short ApoD Flags Precursor		Carbamidomethyl+C(1)	CIQANYSLMENGK	2	0	2	0	0	45.1562	-	-	-	8.87888	-	-
	962	P05090	21 189 APOD HUMAN RecName Full Apolipoprotein D Short Apo D Short ApoD Flags Precursor		Carbamidomethyl+C(1)	CPNPPVQENFDVNK	24	18	5	0	1	8.42342	-	-	7.88455	1.00629	-	-
	962	P05090	21 189 APOD HUMAN RecName Full Apolipoprotein D Short Apo D Short ApoD Flags Precursor		Carbamidomethyl+C(10);Oxidation+M(2)	KMTVTDQVNCPK	1	1	0	0	0	-	-	-	-		-	-
	962	P05090	21 189 APOD HUMAN RecName Full Apolipoprotein D Short Apo D Short ApoD Flags Precursor		Carbamidomethyl+C(9)	MTVTDQVNCPK	34	25	8	0	1	21.3196	-	-	1.32459	1.28618	-	-
	962	P05090	21 189 APOD HUMAN RecName Full Apolipoprotein D Short Apo D Short ApoD Flags Precursor		None	NILTSNNIDVK	29	21	8	0	0	16.7748	-	-	1.50673	1.0183	-	-
	962	P05090	21 189 APOD HUMAN RecName Full Apolipoprotein D Short Apo D Short ApoD Flags Precursor		None	NPNLPPETVDSLK	18	14	3	0	1	27.3934	-	-	1.31136	1.42001	-	-
	962	P05090	21 189 APOD HUMAN RecName Full Apolipoprotein D Short Apo D Short ApoD Flags Precursor		None	VLNQELR	14	11	3	0	0	35.8947	-	-	1.17939	1.9972	-	-
	962	P05090	21 189 APOD HUMAN RecName Full Apolipoprotein D Short Apo D Short ApoD Flags Precursor		None	WYEIEK	3	2	1	0	0	-	-	-	2.17943		-	-
	protein.key	protein.Accession	protein.Description	protein.Key_ForHomologs	peptide.modification	peptide.seq	All Injections (61)*	Injections Samples (38)*	Injections AV (10)*	Injections IAV (6)*	Injections IRV (7)*	% CV AV #	% CV IAV #	% CV IRV #	% CV RT samples $	% CV RT AV $	% CVRT IAV $	% CV RT IRV $
	8236	P05155	23 500 IC1 HUMAN RecName Full Plasma protease C1 inhibitor Short C1 Inh Short C1Inh AltName Full C		Carbamidomethyl+C(4)	DFTCVHQALK	32	15	7	6	3	16.2793	4.99347	32.1668	1.41311	1.27521	0.164329	2.04732
	8236	P05155	23 500 IC1 HUMAN RecName Full Plasma protease C1 inhibitor Short C1 Inh Short C1Inh AltName Full C		None	FQPTLLTLPR	31	15	7	5	4	30.7739	5.59626	19.6216	0.539215	0.615576	0.0823007	2.40892
	8236	P05155	23 500 IC1 HUMAN RecName Full Plasma protease C1 inhibitor Short C1 Inh Short C1Inh AltName Full C		None	GVTSVSQIFHSPDLAIR	60	38	10	6	5	34.0844	19.5898	35.127	0.577667	0.625384	0.121876	1.91616
	8236	P05155	23 500 IC1 HUMAN RecName Full Plasma protease C1 inhibitor Short C1 Inh Short C1Inh AltName Full C		None	HRLEDMEQALSPSVFK	6	5	0	0	1	-	-	-	0.923824		-	-
	8236	P05155	23 500 IC1 HUMAN RecName Full Plasma protease C1 inhibitor Short C1 Inh Short C1Inh AltName Full C		None	LEDMEQALSPSVFK	44	31	9	1	3	32.2829	-	32.2592	0.977071	0.676428	-	4.0889
	8236	P05155	23 500 IC1 HUMAN RecName Full Plasma protease C1 inhibitor Short C1 Inh Short C1Inh AltName Full C		None	LLDSLPSDTR	12	4	0	3	4	-	2.14815	26.22	0.939643		0.0855694	2.59465
	8236	P05155	23 500 IC1 HUMAN RecName Full Plasma protease C1 inhibitor Short C1 Inh Short C1Inh AltName Full C		None	TLYSSSPR	14	10	2	1	0	36.4485	-	-	1.50356	1.37394	-	-
	8236	P05155	23 500 IC1 HUMAN RecName Full Plasma protease C1 inhibitor Short C1 Inh Short C1Inh AltName Full C		None	TNLESILSYPK	44	32	9	1	1	28.6055	-	-	0.498041	0.566766	-	2.24478
	8236	P05155	23 500 IC1 HUMAN RecName Full Plasma protease C1 inhibitor Short C1 Inh Short C1Inh AltName Full C		None	VTTSQDMLSIMEK	30	19	4	3	3	51.4556	92.3473	69.6419	7.97608	3.20435	5.90865	1.82783
	protein.key	protein.Accession	protein.Description	protein.Key_ForHomologs	peptide.modification	peptide.seq	All Injections (61)*	Injections Samples (38)*	Injections AV (10)*	Injections IAV (6)*	Injections IRV (7)*	% CV AV #	% CV IAV #	% CV IRV #	% CV RT samples $	% CV RT AV $	% CVRT IAV $	% CV RT IRV $
	7813	P05546	20 499 HEP2 HUMAN RecName Full Heparin cofactor 2 AltName Full Heparin cofactor II Short HC II Alt		None	ENTVTNDWIPEGEEDDDYLDLEK	1	0	0	1	0	-	-	-	-		-	-
	7813	P05546	20 499 HEP2 HUMAN RecName Full Heparin cofactor 2 AltName Full Heparin cofactor II Short HC II Alt		None	EYYFAEAQIADFSDPAFISK	9	6	1	1	1	-	-	-	0.753627		-	-
	7813	P05546	20 499 HEP2 HUMAN RecName Full Heparin cofactor 2 AltName Full Heparin cofactor II Short HC II Alt		None	GETHEQVHSILHFK	7	5	1	0	0	-	-	-	2.07621		-	-
	7813	P05546	20 499 HEP2 HUMAN RecName Full Heparin cofactor 2 AltName Full Heparin cofactor II Short HC II Alt		None	GGETAQSADPQWEQLNNK	16	9	5	0	2	20.0747	-	69.649	1.46371	0.508445	-	3.65241
	7813	P05546	20 499 HEP2 HUMAN RecName Full Heparin cofactor 2 AltName Full Heparin cofactor II Short HC II Alt		None	IAIDLFK	10	3	0	1	5	-	-	18.1904	0.383102		-	2.22325
	7813	P05546	20 499 HEP2 HUMAN RecName Full Heparin cofactor 2 AltName Full Heparin cofactor II Short HC II Alt		None	LNILNAK	14	8	4	0	2	8.46361	-	12.7997	1.20925	1.24638	-	1.15732
	7813	P05546	20 499 HEP2 HUMAN RecName Full Heparin cofactor 2 AltName Full Heparin cofactor II Short HC II Alt		None	NFGYTLR	4	2	1	0	1	-	-	-	0.225754		-	-
	7813	P05546	20 499 HEP2 HUMAN RecName Full Heparin cofactor 2 AltName Full Heparin cofactor II Short HC II Alt		None	NGNMAGISDQR	10	7	3	0	0	91.6737	-	-	0.738319	11.4842	-	-
	7813	P05546	20 499 HEP2 HUMAN RecName Full Heparin cofactor 2 AltName Full Heparin cofactor II Short HC II Alt		None	NLSMPLLPADFHK	1	1	0	0	0	-	-	-	-		-	-
	7813	P05546	20 499 HEP2 HUMAN RecName Full Heparin cofactor 2 AltName Full Heparin cofactor II Short HC II Alt		None	NYNLVESLK	8	2	0	0	5	-	-	17.3579	2.37013		-	2.43204
	7813	P05546	20 499 HEP2 HUMAN RecName Full Heparin cofactor 2 AltName Full Heparin cofactor II Short HC II Alt		None	QFPILLDFK	12	6	1	1	3	-	-	18.1868	0.874371		-	1.79365
	7813	P05546	20 499 HEP2 HUMAN RecName Full Heparin cofactor 2 AltName Full Heparin cofactor II Short HC II Alt		None	SVNDLYIQK	17	11	5	1	0	13.8641	-	-	1.195	1.08228	-	-
	7813	P05546	20 499 HEP2 HUMAN RecName Full Heparin cofactor 2 AltName Full Heparin cofactor II Short HC II Alt		None	TLEAQLTPR	17	10	5	0	1	8.81793	-	-	1.08378	1.07103	-	0.260046
	7813	P05546	20 499 HEP2 HUMAN RecName Full Heparin cofactor 2 AltName Full Heparin cofactor II Short HC II Alt		None	YEITTIHNLFR	23	14	6	1	1	28.3063	-	-	0.771331	0.687503	-	2.26307
	protein.key	protein.Accession	protein.Description	protein.Key_ForHomologs	peptide.modification	peptide.seq	All Injections (61)*	Injections Samples (38)*	Injections AV (10)*	Injections IAV (6)*	Injections IRV (7)*	% CV AV #	% CV IAV #	% CV IRV #	% CV RT samples $	% CV RT AV $	% CVRT IAV $	% CV RT IRV $
	9540	P06309	5 117 KV205 HUMAN RecName Full Ig kappa chain V II region GM607 Flags Precursor Fragment		Carbamidomethyl+C(11)	VEAEDVGVYYCMQGLQTPQTFGQGTK	1	0	0	0	1	-	-	-	-		-	-
	9540	P06309	5 117 KV205 HUMAN RecName Full Ig kappa chain V II region GM607 Flags Precursor Fragment		Carbamidomethyl+C(14)	ISRVEAEDVGVYYCMQGLQTPQTFGQGTK	1	0	0	1	0	-	-	-	-		-	-
	9540	P06309	5 117 KV205 HUMAN RecName Full Ig kappa chain V II region GM607 Flags Precursor Fragment		Carbamidomethyl+C(23)	DIVMTQSPLSLPVTPGEPASISCR	22	14	4	1	3	19.9093	-	38.3018	0.522641	0.0447657	-	1.58448
	9540	P06309	5 117 KV205 HUMAN RecName Full Ig kappa chain V II region GM607 Flags Precursor Fragment		Carbamidomethyl+C(9)	PGEPASISCR	2	1	1	0	0	-	-	-	-		-	-
	9540	P06309	5 117 KV205 HUMAN RecName Full Ig kappa chain V II region GM607 Flags Precursor Fragment		None	FSGSGSGTDFTLK	21	14	4	1	2	15.2171	-	30.4237	0.986728	0.203688	-	2.80881
	9540	P06309	5 117 KV205 HUMAN RecName Full Ig kappa chain V II region GM607 Flags Precursor Fragment		None	SSQSLLHSNGYNYLDWYLQKPQQSPQLLIYLGSNR	2	2	0	0	0	-	-	-	0.976303		-	-
	9540	P06309	5 117 KV205 HUMAN RecName Full Ig kappa chain V II region GM607 Flags Precursor Fragment	9553 9554 9511	None	TFGQGTK	1	0	0	0	1	-	-	-	-		-	-
	protein.key	protein.Accession	protein.Description	protein.Key_ForHomologs	peptide.modification	peptide.seq	All Injections (61)*	Injections Samples (38)*	Injections AV (10)*	Injections IAV (6)*	Injections IRV (7)*	% CV AV #	% CV IAV #	% CV IRV #	% CV RT samples $	% CV RT AV $	% CVRT IAV $	% CV RT IRV $
	9555	P06312	21 121 KV401 HUMAN RecName Full Ig kappa chain V IV region Flags Precursor Fragment		Carbamidomethyl+C(23)	DIVMTQSPDSLAVSLGERATINCK	1	0	0	0	1	-	-	-	-		-	-
	9555	P06312	21 121 KV401 HUMAN RecName Full Ig kappa chain V IV region Flags Precursor Fragment		None	DIVMTQS	3	0	0	2	1	-	19.8219	-	-		3.33457	-
	9555	P06312	21 121 KV401 HUMAN RecName Full Ig kappa chain V IV region Flags Precursor Fragment		None	DIVMTQSPDSLAVSLGER	51	32	7	6	5	18.6933	24.8524	51.8038	0.563145	0.575747	0.109468	1.43742
	9555	P06312	21 121 KV401 HUMAN RecName Full Ig kappa chain V IV region Flags Precursor Fragment		None	ESGVPDR	4	0	0	3	1	-	6.88343	-	-		1.12514	-
	9555	P06312	21 121 KV401 HUMAN RecName Full Ig kappa chain V IV region Flags Precursor Fragment		None	LLIYWASTR	6	4	1	0	0	-	-	-	0.225317		-	-
	9555	P06312	21 121 KV401 HUMAN RecName Full Ig kappa chain V IV region Flags Precursor Fragment		None	NYLAWYQQKPGQPPK	8	1	1	3	2	-	11.364	3.25285	-		0.140988	2.25609
	9555	P06312	21 121 KV401 HUMAN RecName Full Ig kappa chain V IV region Flags Precursor Fragment		None	PDR	4	0	0	3	1	-	16.7311	-	-		1.1289	-
	9555	P06312	21 121 KV401 HUMAN RecName Full Ig kappa chain V IV region Flags Precursor Fragment		None	SGVPDR	1	0	0	0	1	-	-	-	-		-	-
	9555	P06312	21 121 KV401 HUMAN RecName Full Ig kappa chain V IV region Flags Precursor Fragment		None	SSQSVLYSSNNK	14	6	3	2	3	4.61834	10.7798	25.8647	18.176	18.7046	0.137801	4.85546
	protein.key	protein.Accession	protein.Description	protein.Key_ForHomologs	peptide.modification	peptide.seq	All Injections (61)*	Injections Samples (38)*	Injections AV (10)*	Injections IAV (6)*	Injections IRV (7)*	% CV AV #	% CV IAV #	% CV IRV #	% CV RT samples $	% CV RT AV $	% CVRT IAV $	% CV RT IRV $
	7014	P06396	28 782 GELS HUMAN RecName Full Gelsolin AltName Full Actin depolymerizing factor Short ADF AltName		Carbamidomethyl+C(4)	SEDCFILDHGK	5	4	0	0	1	-	-	-	1.35248		-	-
	7014	P06396	28 782 GELS HUMAN RecName Full Gelsolin AltName Full Actin depolymerizing factor Short ADF AltName		Carbamidomethyl+C(4)	SEDCFILDHGKDGK	16	12	2	0	1	70.3097	-	-	11.4089	1.65685	-	33.3003
	7014	P06396	28 782 GELS HUMAN RecName Full Gelsolin AltName Full Actin depolymerizing factor Short ADF AltName		None	AGALNSNDAFVLK	33	21	8	0	3	27.942	-	6.31349	0.788991	0.832476	-	2.27869
	7014	P06396	28 782 GELS HUMAN RecName Full Gelsolin AltName Full Actin depolymerizing factor Short ADF AltName		None	AQPVQVAEGSEPDGFWEALGGK	35	26	6	1	2	17.534	-	2.66301	0.50954	0.535195	-	0.00927956
	7014	P06396	28 782 GELS HUMAN RecName Full Gelsolin AltName Full Actin depolymerizing factor Short ADF AltName		None	DPDQTDGLGLSYLSSHIANVER	19	11	5	1	2	12.9529	-	32.1251	7.1351	0.659838	-	0.904981
	7014	P06396	28 782 GELS HUMAN RecName Full Gelsolin AltName Full Actin depolymerizing factor Short ADF AltName		None	EPGLQIWR	15	7	7	0	1	32.1226	-	-	0.638432	0.706338	-	-
	7014	P06396	28 782 GELS HUMAN RecName Full Gelsolin AltName Full Actin depolymerizing factor Short ADF AltName		None	HVVPNEVVVQR	10	2	4	0	3	58.5532	-	21.2339	2.38167	0.702758	-	2.59612
	7014	P06396	28 782 GELS HUMAN RecName Full Gelsolin AltName Full Actin depolymerizing factor Short ADF AltName		None	QTQVSVLPEGGETPLFK	28	17	5	2	3	13.6796	6.77676	5.80236	0.674812	0.844959	0.0050322	1.93105
	7014	P06396	28 782 GELS HUMAN RecName Full Gelsolin AltName Full Actin depolymerizing factor Short ADF AltName		None	TGAQELLR	33	23	9	0	1	22.7352	-	-	1.75635	1.21364	-	-
	7014	P06396	28 782 GELS HUMAN RecName Full Gelsolin AltName Full Actin depolymerizing factor Short ADF AltName		None	TPSAAYLWVGTGASEAEK	26	14	6	2	3	44.9626	90.5024	8.86005	0.652155	0.826442	0.807892	1.95408
	7014	P06396	28 782 GELS HUMAN RecName Full Gelsolin AltName Full Actin depolymerizing factor Short ADF AltName		None	VPFDAATLHTSTAMAAQHGMDDDGTGQK	18	10	5	0	3	5.27538	-	36.3194	0.601103	0.607323	-	1.07726
	7014	P06396	28 782 GELS HUMAN RecName Full Gelsolin AltName Full Actin depolymerizing factor Short ADF AltName		None	YIETDPANR	22	16	5	1	0	28.2125	-	-	1.26286	0.731999	-	-
	protein.key	protein.Accession	protein.Description	protein.Key_ForHomologs	peptide.modification	peptide.seq	All Injections (61)*	Injections Samples (38)*	Injections AV (10)*	Injections IAV (6)*	Injections IRV (7)*	% CV AV #	% CV IAV #	% CV IRV #	% CV RT samples $	% CV RT AV $	% CVRT IAV $	% CV RT IRV $
	954	P06727	21 396 APOA4 HUMAN RecName Full Apolipoprotein A IV Short Apo AIV Short ApoA IV Flags Precursor		None	ALVQQMEQLR	21	16	5	0	0	8.99473	-	-	0.797011	0.588762	-	-
	954	P06727	21 396 APOA4 HUMAN RecName Full Apolipoprotein A IV Short Apo AIV Short ApoA IV Flags Precursor		None	ENADSLQASLRPHADELK	41	25	6	4	5	15.4985	4.72712	32.2234	1.09344	0.573737	0.100765	2.27541
	954	P06727	21 396 APOA4 HUMAN RecName Full Apolipoprotein A IV Short Apo AIV Short ApoA IV Flags Precursor		None	GNTEGLQK	5	5	0	0	0	-	-	-	2.38143		-	-
	954	P06727	21 396 APOA4 HUMAN RecName Full Apolipoprotein A IV Short Apo AIV Short ApoA IV Flags Precursor		None	ISASAEELR	52	33	9	5	4	29.7783	18.7609	30.9387	1.29229	1.27015	0.150805	2.68019
	954	P06727	21 396 APOA4 HUMAN RecName Full Apolipoprotein A IV Short Apo AIV Short ApoA IV Flags Precursor		None	LAPLAEDVR	52	36	10	0	5	17.3268	-	44.9827	0.992765	1.01241	-	3.28273
	954	P06727	21 396 APOA4 HUMAN RecName Full Apolipoprotein A IV Short Apo AIV Short ApoA IV Flags Precursor		None	LEPYADQLR	55	35	9	5	5	16.2742	14.4307	19.7658	2.12792	0.892322	0.224889	2.48336
	954	P06727	21 396 APOA4 HUMAN RecName Full Apolipoprotein A IV Short Apo AIV Short ApoA IV Flags Precursor		None	LGEVNTYAGDLQK	54	33	10	4	6	16.5349	11.632	28.9164	2.10422	0.908756	0.0925955	2.15668
	954	P06727	21 396 APOA4 HUMAN RecName Full Apolipoprotein A IV Short Apo AIV Short ApoA IV Flags Precursor		None	LGPHAGDVEGHLSFLEK	40	31	9	0	0	29.7395	-	-	0.764732	0.700672	-	-
	954	P06727	21 396 APOA4 HUMAN RecName Full Apolipoprotein A IV Short Apo AIV Short ApoA IV Flags Precursor		None	LNHQLEGLTFQMK	41	26	7	3	5	30.5378	8.45242	33.6333	3.02422	0.67873	0.0347032	2.17173
	954	P06727	21 396 APOA4 HUMAN RecName Full Apolipoprotein A IV Short Apo AIV Short ApoA IV Flags Precursor		None	SELTQQLNALFQDK	46	28	5	6	6	22.8342	39.4863	23.5241	7.38448	0.192515	4.82342	1.92471
	954	P06727	21 396 APOA4 HUMAN RecName Full Apolipoprotein A IV Short Apo AIV Short ApoA IV Flags Precursor		None	SLAELGGHLDQQVEEFR	59	38	10	5	5	33.4316	22.241	12.6946	0.783612	0.855656	0.158425	2.61258
	954	P06727	21 396 APOA4 HUMAN RecName Full Apolipoprotein A IV Short Apo AIV Short ApoA IV Flags Precursor		None	SLAELGGHLDQQVEEFRR	7	2	0	1	4	-	-	24.2799	0.304775		-	2.34842
	954	P06727	21 396 APOA4 HUMAN RecName Full Apolipoprotein A IV Short Apo AIV Short ApoA IV Flags Precursor		None	SLAPYAQDTQEK	56	34	10	6	5	24.2215	6.87747	26.1563	9.53032	1.17898	0.11766	2.45699
	protein.key	protein.Accession	protein.Description	protein.Key_ForHomologs	peptide.modification	peptide.seq	All Injections (61)*	Injections Samples (38)*	Injections AV (10)*	Injections IAV (6)*	Injections IRV (7)*	% CV AV #	% CV IAV #	% CV IRV #	% CV RT samples $	% CV RT AV $	% CVRT IAV $	% CV RT IRV $
	2965	P08603	19 1231 CFAH HUMAN RecName Full Complement factor H AltName Full H factor 1 Flags Precursor		Carbamidomethyl+C(15)	TKEEYGHSEVVEYYCNPR	54	37	10	2	4	20.8033	60.4854	66.6168	1.07623	1.04262	16.3668	3.58985
	2965	P08603	19 1231 CFAH HUMAN RecName Full Complement factor H AltName Full H factor 1 Flags Precursor		Carbamidomethyl+C(2);Carbamidomethyl+C(14)	ECDTDGWTNDIPICEVVK	53	34	10	3	5	25.4811	7.00345	20.1914	0.514323	0.55463	0.0678073	1.76856
	2965	P08603	19 1231 CFAH HUMAN RecName Full Complement factor H AltName Full H factor 1 Flags Precursor		Carbamidomethyl+C(4);Carbamidomethyl+C(15)	SITCIHGVWTQLPQCVAIDK	51	31	8	5	6	33.3939	13.0008	29.2016	0.601176	0.578836	0.133193	1.91121
	2965	P08603	19 1231 CFAH HUMAN RecName Full Complement factor H AltName Full H factor 1 Flags Precursor		Carbamidomethyl+C(5);Carbamidomethyl+C(16)	GDAVCTESGWRPLPSCEEK	43	25	8	3	6	17.0694	7.57425	38.4128	4.39999	0.852095	0.260313	2.38744
	2965	P08603	19 1231 CFAH HUMAN RecName Full Complement factor H AltName Full H factor 1 Flags Precursor		Carbamidomethyl+C(5);Carbamidomethyl+C(19)	VSVLCQENYLIQEGEEITCK	56	35	9	6	5	23.9516	5.93533	28.4688	0.46547	0.507034	0.104701	1.23234
	2965	P08603	19 1231 CFAH HUMAN RecName Full Complement factor H AltName Full H factor 1 Flags Precursor		Carbamidomethyl+C(5)	AVYTCNEGYQLLGEINYR	49	33	8	3	4	44.1259	1.29422	12.9256	0.53539	7.1778	0.0431477	1.9402
	2965	P08603	19 1231 CFAH HUMAN RecName Full Complement factor H AltName Full H factor 1 Flags Precursor		Carbamidomethyl+C(6)	SIDVACHPGYALPK	24	11	3	5	5	15.7636	18.0499	30.7246	9.2164	0.915198	0.254503	2.14654
	2965	P08603	19 1231 CFAH HUMAN RecName Full Complement factor H AltName Full H factor 1 Flags Precursor		Carbamidomethyl+C(7);Carbamidomethyl+C(12)	WSSPPQCEGLPCK	50	33	7	3	6	13.3277	2.46885	51.2759	9.58266	1.06588	0.228288	2.39275
	2965	P08603	19 1231 CFAH HUMAN RecName Full Complement factor H AltName Full H factor 1 Flags Precursor		Carbamidomethyl+C(9)	DGWSAQPTCIK	54	34	9	6	4	19.7469	17.9898	63.3954	1.04649	1.33303	0.206373	3.38104
	2965	P08603	19 1231 CFAH HUMAN RecName Full Complement factor H AltName Full H factor 1 Flags Precursor		None	EIMENYNIALR	45	32	7	3	3	27.732	63.41	10.8683	0.592859	0.723656	1.69127	1.96935
	2965	P08603	19 1231 CFAH HUMAN RecName Full Complement factor H AltName Full H factor 1 Flags Precursor		None	NGQWSEPPK	6	4	1	0	1	-	-	-	0.993019		-	-
	2965	P08603	19 1231 CFAH HUMAN RecName Full Complement factor H AltName Full H factor 1 Flags Precursor		None	NTEILTGSWSDQTYPEGTQAIYK	51	35	9	5	1	39.0191	134.788	-	0.57582	0.51725	6.89386	0.18543
	2965	P08603	19 1231 CFAH HUMAN RecName Full Complement factor H AltName Full H factor 1 Flags Precursor		None	SSNLIILEEHLK	58	37	10	5	5	37.508	9.87164	66.7471	0.689119	0.743487	0.0931326	2.1918
	2965	P08603	19 1231 CFAH HUMAN RecName Full Complement factor H AltName Full H factor 1 Flags Precursor	6465	None	NGQWSEPPK	3	2	0	1	0	-	-	-	3.20607		-	-
	protein.key	protein.Accession	protein.Description	protein.Key_ForHomologs	peptide.modification	peptide.seq	All Injections (61)*	Injections Samples (38)*	Injections AV (10)*	Injections IAV (6)*	Injections IRV (7)*	% CV AV #	% CV IAV #	% CV IRV #	% CV RT samples $	% CV RT AV $	% CVRT IAV $	% CV RT IRV $
	3771	P0C0L4	20 1744 CO4A HUMAN RecName Full Complement C4 A AltName Full Acidic complement C4 AltName Full C3		Carbamidomethyl+C(6);Carbamidomethyl+C(11);Carbamidomethyl+C(13)	LLATLCSAEVCQCAEGK	27	18	4	2	2	11.5293	10.4121	4.85641	0.834898	0.648648	0.726952	1.6676
	3771	P0C0L4	20 1744 CO4A HUMAN RecName Full Complement C4 A AltName Full Acidic complement C4 AltName Full C3		None	ALEILQEEDLIDEDDIPVR	27	18	4	2	2	24.5139	9.67333	4.56741	0.524806	0.457576	0.110225	1.27638
	3771	P0C0L4	20 1744 CO4A HUMAN RecName Full Complement C4 A AltName Full Acidic complement C4 AltName Full C3		None	EELVYELNPLDHR	27	18	4	2	2	38.924	6.72997	26.5312	0.619953	0.592041	0.178117	1.82381
	3771	P0C0L4	20 1744 CO4A HUMAN RecName Full Complement C4 A AltName Full Acidic complement C4 AltName Full C3		None	GHLFLQTDQPIYNPGQR	24	16	4	1	2	37.1693	-	11.3317	6.7017	0.652131	-	1.90626
	3771	P0C0L4	20 1744 CO4A HUMAN RecName Full Complement C4 A AltName Full Acidic complement C4 AltName Full C3		None	GSFEFPVGDAVSK	26	18	4	2	2	28.4366	3.04404	0.934253	0.695849	0.634936	0.0791326	0.00902771
	3771	P0C0L4	20 1744 CO4A HUMAN RecName Full Complement C4 A AltName Full Acidic complement C4 AltName Full C3		None	LTVAAPPSGGPGFLSIERPDSRPPR	22	14	3	2	2	53.087	7.32274	6.59818	0.72075	0.777647	0.138662	2.02356
	3771	P0C0L4	20 1744 CO4A HUMAN RecName Full Complement C4 A AltName Full Acidic complement C4 AltName Full C3		None	STQDTVIALDALSAYWIASHTTEER	15	11	1	1	2	-	-	75.9819	12.554		-	5.41102
	3771	P0C0L4	20 1744 CO4A HUMAN RecName Full Complement C4 A AltName Full Acidic complement C4 AltName Full C3		None	VLSLAQEQVGGSPEK	25	18	4	1	1	8.41831	-	-	0.940791	0.833094	-	2.324
	3771	P0C0L4	20 1744 CO4A HUMAN RecName Full Complement C4 A AltName Full Acidic complement C4 AltName Full C3		None	VTASDPLDTLGSEGALSPGGVASLLR	27	18	4	2	2	26.6759	10.387	0.198178	0.469847	0.390815	0.0828809	1.23951
	3771	P0C0L4	20 1744 CO4A HUMAN RecName Full Complement C4 A AltName Full Acidic complement C4 AltName Full C3		None	YVSHFETEGPHVLLYFDSVPTSR	23	18	4	1	0	27.6561	-	-	0.595655	0.611108	-	-
	3771	P0C0L4	20 1744 CO4A HUMAN RecName Full Complement C4 A AltName Full Acidic complement C4 AltName Full C3	3772	Carbamidomethyl+C(6);Carbamidomethyl+C(11);Carbamidomethyl+C(13)	LLATLCSAEVCQCAEGK	6	3	0	1	2	-	-	46.4111	0.669714		-	3.38065
	3771	P0C0L4	20 1744 CO4A HUMAN RecName Full Complement C4 A AltName Full Acidic complement C4 AltName Full C3	3772	None	ALEILQEEDLIDEDDIPVR	6	4	0	1	1	-	-	-	0.629507		-	-
	3771	P0C0L4	20 1744 CO4A HUMAN RecName Full Complement C4 A AltName Full Acidic complement C4 AltName Full C3	3772	None	EELVYELNPLDHR	7	4	0	1	2	-	-	30.6167	0.714421		-	3.14337
	3771	P0C0L4	20 1744 CO4A HUMAN RecName Full Complement C4 A AltName Full Acidic complement C4 AltName Full C3	3772	None	GPEVQLVAHSPWLK	5	4	0	0	1	-	-	-	0.840134		-	-
	3771	P0C0L4	20 1744 CO4A HUMAN RecName Full Complement C4 A AltName Full Acidic complement C4 AltName Full C3	3772	None	STQDTVIALDALSAYWIASHTTEER	3	0	0	1	2	-	-	116.544	-		-	10.1036
	3771	P0C0L4	20 1744 CO4A HUMAN RecName Full Complement C4 A AltName Full Acidic complement C4 AltName Full C3	3772	None	VTASDPLDTLGSEGALSPGGVASLLR	7	4	0	1	2	-	-	41.7317	0.543651		-	2.1081
	3771	P0C0L4	20 1744 CO4A HUMAN RecName Full Complement C4 A AltName Full Acidic complement C4 AltName Full C3	3772	None	YVSHFETEGPHVLLYFDSVPTSR	4	4	0	0	0	-	-	-	0.704414		-	-
	protein.key	protein.Accession	protein.Description	protein.Key_ForHomologs	peptide.modification	peptide.seq	All Injections (61)*	Injections Samples (38)*	Injections AV (10)*	Injections IAV (6)*	Injections IRV (7)*	% CV AV #	% CV IAV #	% CV IRV #	% CV RT samples $	% CV RT AV $	% CVRT IAV $	% CV RT IRV $
	3772	P0C0L5	20 1744 CO4B HUMAN RecName Full Complement C4 B AltName Full Basic complement C4 AltName Full C3		Carbamidomethyl+C(6);Carbamidomethyl+C(11);Carbamidomethyl+C(13)	LLATLCSAEVCQCAEGK	24	14	5	3	2	47.8174	6.38492	50.8184	0.477136	1.04378	0.139715	-
	3772	P0C0L5	20 1744 CO4B HUMAN RecName Full Complement C4 B AltName Full Basic complement C4 AltName Full C3		None	ALEILQEEDLIDEDDIPVR	27	16	6	3	2	23.1661	0.747192	47.7827	0.241722	0.527635	0.113752	-
	3772	P0C0L5	20 1744 CO4B HUMAN RecName Full Complement C4 B AltName Full Basic complement C4 AltName Full C3		None	EELVYELNPLDHR	26	15	6	3	2	32.6987	6.83902	19.3335	0.306207	0.652787	0.0848799	-
	3772	P0C0L5	20 1744 CO4B HUMAN RecName Full Complement C4 B AltName Full Basic complement C4 AltName Full C3		None	GHLFLQTDQPIYNPGQR	22	13	6	1	2	30.343	-	32.2156	7.74477	0.790474	-	-
	3772	P0C0L5	20 1744 CO4B HUMAN RecName Full Complement C4 B AltName Full Basic complement C4 AltName Full C3		None	GSFEFPVGDAVSK	27	16	6	3	2	38.0381	7.29588	31.8499	7.20656	0.749029	0.149155	-
	3772	P0C0L5	20 1744 CO4B HUMAN RecName Full Complement C4 B AltName Full Basic complement C4 AltName Full C3		None	LTVAAPPSGGPGFLSIERPDSRPPR	26	16	6	2	2	45.5629	6.1305	87.3855	0.443912	0.789119	0.0714448	-
	3772	P0C0L5	20 1744 CO4B HUMAN RecName Full Complement C4 B AltName Full Basic complement C4 AltName Full C3		None	VLSLAQEQVGGSPEK	26	15	6	3	2	15.7274	4.97391	107.823	0.849128	1.03634	0.120149	-
	3772	P0C0L5	20 1744 CO4B HUMAN RecName Full Complement C4 B AltName Full Basic complement C4 AltName Full C3		None	VTASDPLDTLGSEGALSPGGVASLLR	27	16	6	3	2	28.1303	3.42299	38.9878	0.211231	0.464307	0.102344	-
	3772	P0C0L5	20 1744 CO4B HUMAN RecName Full Complement C4 B AltName Full Basic complement C4 AltName Full C3		None	YVSHFETEGPHVLLYFDSVPTSR	21	15	6	0	0	26.1624	-	-	0.407807	0.646906	-	-
	3772	P0C0L5	20 1744 CO4B HUMAN RecName Full Complement C4 B AltName Full Basic complement C4 AltName Full C3	3771	Carbamidomethyl+C(6);Carbamidomethyl+C(11);Carbamidomethyl+C(13)	LLATLCSAEVCQCAEGK	6	3	0	1	2	-	-	141.421	0.669714		-	3.38065
	3772	P0C0L5	20 1744 CO4B HUMAN RecName Full Complement C4 B AltName Full Basic complement C4 AltName Full C3	3771	None	ALEILQEEDLIDEDDIPVR	6	4	0	1	1	-	-	-	0.629507		-	-
	3772	P0C0L5	20 1744 CO4B HUMAN RecName Full Complement C4 B AltName Full Basic complement C4 AltName Full C3	3771	None	EELVYELNPLDHR	7	4	0	1	2	-	-	141.421	0.714421		-	3.14337
	3772	P0C0L5	20 1744 CO4B HUMAN RecName Full Complement C4 B AltName Full Basic complement C4 AltName Full C3	3771	None	GPEVQLVAHSPWLK	5	4	0	0	1	-	-	-	0.840134		-	-
	3772	P0C0L5	20 1744 CO4B HUMAN RecName Full Complement C4 B AltName Full Basic complement C4 AltName Full C3	3771	None	STQDTVIALDALSAYWIASHTTEER	3	0	0	1	2	-	-	141.421	-		-	10.1036
	3772	P0C0L5	20 1744 CO4B HUMAN RecName Full Complement C4 B AltName Full Basic complement C4 AltName Full C3	3771	None	VTASDPLDTLGSEGALSPGGVASLLR	7	4	0	1	2	-	-	141.421	0.543651		-	2.1081
	3772	P0C0L5	20 1744 CO4B HUMAN RecName Full Complement C4 B AltName Full Basic complement C4 AltName Full C3	3771	None	YVSHFETEGPHVLLYFDSVPTSR	4	4	0	0	0	-	-	-	0.704414		-	-
	protein.key	protein.Accession	protein.Description	protein.Key_ForHomologs	peptide.modification	peptide.seq	All Injections (61)*	Injections Samples (38)*	Injections AV (10)*	Injections IAV (6)*	Injections IRV (7)*	% CV AV #	% CV IAV #	% CV IRV #	% CV RT samples $	% CV RT AV $	% CVRT IAV $	% CV RT IRV $
	3567	P10909	23 449 CLUS HUMAN RecName Full Clusterin AltName Full Complement associated protein SP 40 40 AltNa		Carbamidomethyl+C(7)	EILSVDCSTNNPSQAK	57	34	10	6	6	14.4154	6.80518	33.8352	3.10116	0.996831	0.185992	2.54884
	3567	P10909	23 449 CLUS HUMAN RecName Full Clusterin AltName Full Complement associated protein SP 40 40 AltNa		None	ASSIIDELFQDR	61	38	10	6	6	27.7766	8.37785	34.2324	0.429507	0.466302	0.0894995	1.67118
	3567	P10909	23 449 CLUS HUMAN RecName Full Clusterin AltName Full Complement associated protein SP 40 40 AltNa		None	ELDESLQVAER	54	35	10	6	2	35.5228	6.27826	112.345	0.980478	3.23086	0.204279	14.9431
	3567	P10909	23 449 CLUS HUMAN RecName Full Clusterin AltName Full Complement associated protein SP 40 40 AltNa		None	IDSLLENDR	51	34	6	4	6	21.8666	59.2242	80.3122	1.01688	0.915925	0.0992755	2.32658
	3567	P10909	23 449 CLUS HUMAN RecName Full Clusterin AltName Full Complement associated protein SP 40 40 AltNa		None	LFDSDPITVTVPVEVSR	57	37	10	3	6	32.4209	10.1579	26.7361	0.527544	0.570882	0.106996	1.64073
	3567	P10909	23 449 CLUS HUMAN RecName Full Clusterin AltName Full Complement associated protein SP 40 40 AltNa		None	VTTVASHTSDSDVPSGVTEVVVK	61	38	10	6	6	17.0335	5.5549	30.3625	0.90485	0.93879	0.196318	2.11379
	protein.key	protein.Accession	protein.Description	protein.Key_ForHomologs	peptide.modification	peptide.seq	All Injections (61)*	Injections Samples (38)*	Injections AV (10)*	Injections IAV (6)*	Injections IRV (7)*	% CV AV #	% CV IAV #	% CV IRV #	% CV RT samples $	% CV RT AV $	% CVRT IAV $	% CV RT IRV $
	157	P19652	19 201 A1AG2 HUMAN RecName Full Alpha 1 acid glycoprotein 2 Short AGP 2 AltName Full Orosomucoid 2		Carbamidomethyl+C(12);Carbamidomethyl+C(14)	EQLGEFYEALDCLCIPR	61	38	10	6	6	28.7051	8.45263	47.4231	0.401636	0.410451	0.0842753	1.41047
	157	P19652	19 201 A1AG2 HUMAN RecName Full Alpha 1 acid glycoprotein 2 Short AGP 2 AltName Full Orosomucoid 2		None	EHVAHLLFLR	33	24	7	0	2	43.4156	-	37.1933	1.04364	0.924076	-	0.200892
	157	P19652	19 201 A1AG2 HUMAN RecName Full Alpha 1 acid glycoprotein 2 Short AGP 2 AltName Full Orosomucoid 2		None	NWGLSFYADKPETTK	45	33	8	2	2	35.2864	12.9048	2.31224	0.611865	0.79055	0.0112971	3.68197
	157	P19652	19 201 A1AG2 HUMAN RecName Full Alpha 1 acid glycoprotein 2 Short AGP 2 AltName Full Orosomucoid 2		None	SDVMYTDWK	30	15	3	5	6	11.9815	12.19	66.5895	14.5265	0.339211	0.0685274	2.42101
	157	P19652	19 201 A1AG2 HUMAN RecName Full Alpha 1 acid glycoprotein 2 Short AGP 2 AltName Full Orosomucoid 2	156	None	TEDTIFLR	61	38	10	6	6	33.9053	28.9968	56.7122	0.775322	0.808224	0.116747	2.53988
	157	P19652	19 201 A1AG2 HUMAN RecName Full Alpha 1 acid glycoprotein 2 Short AGP 2 AltName Full Orosomucoid 2	156	None	WFYIASAFR	56	34	10	6	5	33.7627	27.9048	61.3836	0.492108	0.520333	0.100745	1.95452
	protein.key	protein.Accession	protein.Description	protein.Key_ForHomologs	peptide.modification	peptide.seq	All Injections (61)*	Injections Samples (38)*	Injections AV (10)*	Injections IAV (6)*	Injections IRV (7)*	% CV AV #	% CV IAV #	% CV IRV #	% CV RT samples $	% CV RT AV $	% CVRT IAV $	% CV RT IRV $
	8729	P19823	19 946 ITIH2 HUMAN RecName Full Inter alpha trypsin inhibitor heavy chain H2 Short Inter alpha inhi		None	AEDHFSVIDFNQNIR	54	38	10	3	2	31.8824	26.7362	14.8792	0.621219	0.691647	0.105159	2.53683
	8729	P19823	19 946 ITIH2 HUMAN RecName Full Inter alpha trypsin inhibitor heavy chain H2 Short Inter alpha inhi		None	FLHVPDTFEGHFDGVPVISK	45	32	9	0	4	32.1463	-	73.721	0.577517	0.666936	-	3.01148
	8729	P19823	19 946 ITIH2 HUMAN RecName Full Inter alpha trypsin inhibitor heavy chain H2 Short Inter alpha inhi		None	FYNQVSTPLLR	61	38	10	6	6	38.1835	6.46703	29.495	0.68307	0.731837	0.111922	2.20515
	8729	P19823	19 946 ITIH2 HUMAN RecName Full Inter alpha trypsin inhibitor heavy chain H2 Short Inter alpha inhi		None	IQPSGGTNINEALLR	55	32	10	6	6	20.4366	6.06849	35.709	0.723079	0.806097	0.112802	2.16531
	8729	P19823	19 946 ITIH2 HUMAN RecName Full Inter alpha trypsin inhibitor heavy chain H2 Short Inter alpha inhi		None	LSNENHGIAQR	53	30	10	6	6	33.6407	16.0131	47.2395	17.9881	2.0469	0.643571	2.49142
	8729	P19823	19 946 ITIH2 HUMAN RecName Full Inter alpha trypsin inhibitor heavy chain H2 Short Inter alpha inhi		None	NVQFNYPHTSVTDVTQNNFHNYFGGSEIVVAGK	52	36	7	5	3	35.0342	49.5985	35.4618	0.539487	0.382823	0.166934	1.70683
	8729	P19823	19 946 ITIH2 HUMAN RecName Full Inter alpha trypsin inhibitor heavy chain H2 Short Inter alpha inhi		None	TEVNVLPGAK	57	34	10	6	6	17.3639	48.2592	27.335	0.985213	1.04758	1.11608	2.63342
	8729	P19823	19 946 ITIH2 HUMAN RecName Full Inter alpha trypsin inhibitor heavy chain H2 Short Inter alpha inhi		None	VVNNSPQPQNVVFDVQIPK	59	37	10	5	6	22.2227	5.21305	31.0495	0.534908	0.605035	0.12059	1.90204
	protein.key	protein.Accession	protein.Description	protein.Key_ForHomologs	peptide.modification	peptide.seq	All Injections (61)*	Injections Samples (38)*	Injections AV (10)*	Injections IAV (6)*	Injections IRV (7)*	% CV AV #	% CV IAV #	% CV IRV #	% CV RT samples $	% CV RT AV $	% CVRT IAV $	% CV RT IRV $
	8728	P19827	28 911 ITIH1 HUMAN RecName Full Inter alpha trypsin inhibitor heavy chain H1 Short Inter alpha inhi		None	AAISGENAGLVR	53	37	10	0	5	21.9344	-	24.8767	1.16918	1.11454	-	2.68412
	8728	P19827	28 911 ITIH1 HUMAN RecName Full Inter alpha trypsin inhibitor heavy chain H1 Short Inter alpha inhi		None	EVAFDLEIPK	45	31	9	0	5	29.217	-	21.7403	0.46735	0.536464	-	1.82649
	8728	P19827	28 911 ITIH1 HUMAN RecName Full Inter alpha trypsin inhibitor heavy chain H1 Short Inter alpha inhi		None	FAHYVVTSQVVNTANEAR	53	38	10	0	4	15.9361	-	29.8357	0.886033	0.912856	-	2.87517
	8728	P19827	28 911 ITIH1 HUMAN RecName Full Inter alpha trypsin inhibitor heavy chain H1 Short Inter alpha inhi		None	GFSLDEATNLNGGLLR	35	25	4	0	5	22.1281	-	16.5214	0.564583	0.597406	-	1.76518
	8728	P19827	28 911 ITIH1 HUMAN RecName Full Inter alpha trypsin inhibitor heavy chain H1 Short Inter alpha inhi		None	GMADQDGLKPTIDKPSEDSPPLEMLGPR	14	12	2	0	0	110.643	-	-	0.812385	0.960785	-	-
	8728	P19827	28 911 ITIH1 HUMAN RecName Full Inter alpha trypsin inhibitor heavy chain H1 Short Inter alpha inhi		None	GSLVQASEANLQAAQDFVR	51	36	10	0	4	24.2137	-	11.7885	5.26755	0.542037	-	1.61585
	8728	P19827	28 911 ITIH1 HUMAN RecName Full Inter alpha trypsin inhibitor heavy chain H1 Short Inter alpha inhi		None	LDAQASFLPK	41	28	8	0	5	22.6402	-	23.9915	0.747488	0.860085	-	2.19442
	8728	P19827	28 911 ITIH1 HUMAN RecName Full Inter alpha trypsin inhibitor heavy chain H1 Short Inter alpha inhi		None	QYYEGSEIVVAGR	19	12	3	0	4	11.0137	-	16.9191	19.811	0.561562	-	2.17789
	8728	P19827	28 911 ITIH1 HUMAN RecName Full Inter alpha trypsin inhibitor heavy chain H1 Short Inter alpha inhi		None	VTFQLTYEEVLK	37	30	7	0	0	13.8509	-	-	0.575236	0.588148	-	-
	protein.key	protein.Accession	protein.Description	protein.Key_ForHomologs	peptide.modification	peptide.seq	All Injections (61)*	Injections Samples (38)*	Injections AV (10)*	Injections IAV (6)*	Injections IRV (7)*	% CV AV #	% CV IAV #	% CV IRV #	% CV RT samples $	% CV RT AV $	% CVRT IAV $	% CV RT IRV $
	14103	P20742	26 1482 PZP HUMAN RecName Full Pregnancy zone protein AltName Full C3 and PZP like alpha 2 macrogl	171	None	ATVLNYLPK	31	18	5	3	5	56.8262	55.1318	60.6233	0.683777	0.839499	0.171366	2.01536
	14103	P20742	26 1482 PZP HUMAN RecName Full Pregnancy zone protein AltName Full C3 and PZP like alpha 2 macrogl	171	None	MVSGFIPLKPTVK	31	18	5	3	5	53.7746	53.1264	64.1268	0.726647	0.902196	0.165956	2.12667
	14103	P20742	26 1482 PZP HUMAN RecName Full Pregnancy zone protein AltName Full C3 and PZP like alpha 2 macrogl	171	None	SSGSLLNNAIK	31	18	5	3	5	61.0469	56.9024	71.8482	0.916818	1.11402	0.271094	2.06697
	protein.key	protein.Accession	protein.Description	protein.Key_ForHomologs	peptide.modification	peptide.seq	All Injections (61)*	Injections Samples (38)*	Injections AV (10)*	Injections IAV (6)*	Injections IRV (7)*	% CV AV #	% CV IAV #	% CV IRV #	% CV RT samples $	% CV RT AV $	% CVRT IAV $	% CV RT IRV $
	19567	P25311	18 295 ZA2G HUMAN RecName Full Zinc alpha 2 glycoprotein AltName Full Zn alpha 2 glycoprotein Shor		Carbamidomethyl+C(7)	AYLEEECPATLR	27	11	4	5	6	23.5589	9.84551	30.8133	0.482644	0.657769	0.20316	2.25315
	19567	P25311	18 295 ZA2G HUMAN RecName Full Zinc alpha 2 glycoprotein AltName Full Zn alpha 2 glycoprotein Shor		None	AGEVQEPELR	7	5	2	0	0	6.20231	-	-	5.00568	0.88834	-	-
	19567	P25311	18 295 ZA2G HUMAN RecName Full Zinc alpha 2 glycoprotein AltName Full Zn alpha 2 glycoprotein Shor		None	AREDIFMETLK	3	2	0	0	1	-	-	-	0.570992		-	-
	19567	P25311	18 295 ZA2G HUMAN RecName Full Zinc alpha 2 glycoprotein AltName Full Zn alpha 2 glycoprotein Shor		None	DIVEYYNDSNGSHVLQGR	5	4	1	0	0	-	-	-	0.584561		-	-
	19567	P25311	18 295 ZA2G HUMAN RecName Full Zinc alpha 2 glycoprotein AltName Full Zn alpha 2 glycoprotein Shor		None	EIPAWVPFDPAAQITK	41	24	5	5	6	10.1847	9.01661	19.0306	0.328146	0.383741	0.0792103	1.70289
	19567	P25311	18 295 ZA2G HUMAN RecName Full Zinc alpha 2 glycoprotein AltName Full Zn alpha 2 glycoprotein Shor		None	HVEDVPAFQALGSLNDLQFFR	35	22	2	5	5	21.3902	7.46724	36.7681	0.266331	0.538552	0.314637	1.86178
	19567	P25311	18 295 ZA2G HUMAN RecName Full Zinc alpha 2 glycoprotein AltName Full Zn alpha 2 glycoprotein Shor		None	IDVHWTR	7	2	1	1	2	-	-	5.36289	3.42184		-	2.49283
	19567	P25311	18 295 ZA2G HUMAN RecName Full Zinc alpha 2 glycoprotein AltName Full Zn alpha 2 glycoprotein Shor		None	QDPPSVVVTSHQAPGEK	19	10	2	1	5	2.69008	-	20.9853	1.57856	0.729839	-	2.3183
	19567	P25311	18 295 ZA2G HUMAN RecName Full Zinc alpha 2 glycoprotein AltName Full Zn alpha 2 glycoprotein Shor		None	QDSQLQK	2	2	0	0	0	-	-	-	20.9049		-	-
	19567	P25311	18 295 ZA2G HUMAN RecName Full Zinc alpha 2 glycoprotein AltName Full Zn alpha 2 glycoprotein Shor		None	QVEGMEDWK	21	13	5	0	3	59.5341	-	129.667	0.448373	5.47993	-	38.1667
	19567	P25311	18 295 ZA2G HUMAN RecName Full Zinc alpha 2 glycoprotein AltName Full Zn alpha 2 glycoprotein Shor		None	WEAEPVYVQR	9	7	1	0	1	-	-	-	3.02631		-	-
	protein.key	protein.Accession	protein.Description	protein.Key_ForHomologs	peptide.modification	peptide.seq	All Injections (61)*	Injections Samples (38)*	Injections AV (10)*	Injections IAV (6)*	Injections IRV (7)*	% CV AV #	% CV IAV #	% CV IRV #	% CV RT samples $	% CV RT AV $	% CVRT IAV $	% CV RT IRV $
	13559	P27169	2 355 PON1 HUMAN RecName Full Serum paraoxonase arylesterase 1 Short PON 1 EC 3 1 1 2 EC 3 1 8 1 Al		Carbamidomethyl+C(10)	EVQPVELPNCNLVK	40	27	7	1	5	25.3647	-	24.9428	0.730178	0.858747	-	1.756
	13559	P27169	2 355 PON1 HUMAN RecName Full Serum paraoxonase arylesterase 1 Short PON 1 EC 3 1 1 2 EC 3 1 8 1 Al		Carbamidomethyl+C(15)	LNALREVQPVELPNCNLVK	7	5	2	0	0	44.1208	-	-	0.356511	1.13508	-	-
	13559	P27169	2 355 PON1 HUMAN RecName Full Serum paraoxonase arylesterase 1 Short PON 1 EC 3 1 1 2 EC 3 1 8 1 Al		Carbamidomethyl+C(24)	SLDFNTLVDNISVDPETGDLWVGCHPNGMK	11	9	0	0	2	-	-	19.1813	2.685		-	0.893808
	13559	P27169	2 355 PON1 HUMAN RecName Full Serum paraoxonase arylesterase 1 Short PON 1 EC 3 1 1 2 EC 3 1 8 1 Al		None	FDVSSFNPHGISTFTDEDNAMYLLVVNHPDAK	14	10	3	0	1	11.1702	-	-	5.71898	0.463096	-	-
	13559	P27169	2 355 PON1 HUMAN RecName Full Serum paraoxonase arylesterase 1 Short PON 1 EC 3 1 1 2 EC 3 1 8 1 Al		None	GIETGSEDMEILPNGLAFISSGLK	2	1	0	1	0	-	-	-	-		-	-
	13559	P27169	2 355 PON1 HUMAN RecName Full Serum paraoxonase arylesterase 1 Short PON 1 EC 3 1 1 2 EC 3 1 8 1 Al		None	IFFYDSENPPASEVLR	27	20	4	0	3	32.1703	-	21.8336	0.658293	0.73605	-	0.500009
	13559	P27169	2 355 PON1 HUMAN RecName Full Serum paraoxonase arylesterase 1 Short PON 1 EC 3 1 1 2 EC 3 1 8 1 Al		None	ILLMDLNEEDPTVLELGITGSK	18	16	0	0	2	-	-	3.55534	0.446512		-	0.00185327
	13559	P27169	2 355 PON1 HUMAN RecName Full Serum paraoxonase arylesterase 1 Short PON 1 EC 3 1 1 2 EC 3 1 8 1 Al		None	IQNILTEEPK	18	11	5	0	2	27.0376	-	7.59613	0.793552	1.3989	-	1.03932
	13559	P27169	2 355 PON1 HUMAN RecName Full Serum paraoxonase arylesterase 1 Short PON 1 EC 3 1 1 2 EC 3 1 8 1 Al		None	LLIGTVFHK	3	0	1	1	1	-	-	-	-		-	-
	13559	P27169	2 355 PON1 HUMAN RecName Full Serum paraoxonase arylesterase 1 Short PON 1 EC 3 1 1 2 EC 3 1 8 1 Al		None	SFNPNSPGK	26	19	6	0	1	29.9549	-	-	5.09949	1.81106	-	-
	13559	P27169	2 355 PON1 HUMAN RecName Full Serum paraoxonase arylesterase 1 Short PON 1 EC 3 1 1 2 EC 3 1 8 1 Al		None	VVAEGFDFANGINISPDGK	31	23	6	0	2	25.3248	-	5.13849	2.45789	0.582356	-	2.0057
	13559	P27169	2 355 PON1 HUMAN RecName Full Serum paraoxonase arylesterase 1 Short PON 1 EC 3 1 1 2 EC 3 1 8 1 Al		None	YPGIKSFNPNSPGK	1	1	0	0	0	-	-	-	-		-	-
	13559	P27169	2 355 PON1 HUMAN RecName Full Serum paraoxonase arylesterase 1 Short PON 1 EC 3 1 1 2 EC 3 1 8 1 Al		None	YVYIAELLAHK	18	12	3	0	3	22.8141	-	39.0445	0.610673	0.391179	-	2.4631
	protein.key	protein.Accession	protein.Description	protein.Key_ForHomologs	peptide.modification	peptide.seq	All Injections (61)*	Injections Samples (38)*	Injections AV (10)*	Injections IAV (6)*	Injections IRV (7)*	% CV AV #	% CV IAV #	% CV IRV #	% CV RT samples $	% CV RT AV $	% CVRT IAV $	% CV RT IRV $
	530	P43652	22 599 AFAM HUMAN RecName Full Afamin AltName Full Alpha albumin Short Alpha Alb Flags Precursor		Carbamidomethyl+C(16);Carbamidomethyl+C(17);Carbamidomethyl+C(24)	ELISLVEDVSSNYDGCCEGDVVQCIR	31	19	5	4	3	23.0689	6.94185	28.3113	0.505261	0.409642	0.0757716	0.611996
	530	P43652	22 599 AFAM HUMAN RecName Full Afamin AltName Full Alpha albumin Short Alpha Alb Flags Precursor		Carbamidomethyl+C(19)	TYVPPPFSQDLFTFHADMCQSQNEELQR	11	4	2	3	2	4.06237	16.0949	47.9783	0.321708	1.16971	0.184827	-
	530	P43652	22 599 AFAM HUMAN RecName Full Afamin AltName Full Alpha albumin Short Alpha Alb Flags Precursor		Carbamidomethyl+C(2)	ICAMEGLPQK	11	7	2	1	1	14.4368	-	-	1.47763	0.131298	-	-
	530	P43652	22 599 AFAM HUMAN RecName Full Afamin AltName Full Alpha albumin Short Alpha Alb Flags Precursor		Carbamidomethyl+C(2)	LCFFYNK	2	2	0	0	0	-	-	-	0.270078		-	-
	530	P43652	22 599 AFAM HUMAN RecName Full Afamin AltName Full Alpha albumin Short Alpha Alb Flags Precursor		Carbamidomethyl+C(20);Carbamidomethyl+C(21);Carbamidomethyl+C(28)	IEFKELISLVEDVSSNYDGCCEGDVVQCIR	3	1	0	1	1	-	-	-	-		-	-
	530	P43652	22 599 AFAM HUMAN RecName Full Afamin AltName Full Alpha albumin Short Alpha Alb Flags Precursor		Carbamidomethyl+C(3)	RPCFESLK	1	0	0	0	1	-	-	-	-		-	-
	530	P43652	22 599 AFAM HUMAN RecName Full Afamin AltName Full Alpha albumin Short Alpha Alb Flags Precursor		Carbamidomethyl+C(4);Carbamidomethyl+C(5)	IKECCEK	3	1	0	1	0	-	-	-	-		-	-
	530	P43652	22 599 AFAM HUMAN RecName Full Afamin AltName Full Alpha albumin Short Alpha Alb Flags Precursor		Carbamidomethyl+C(7)	AESPEVCFNEESPK	9	2	0	5	1	-	6.34716	-	1.6599		0.225434	-
	530	P43652	22 599 AFAM HUMAN RecName Full Afamin AltName Full Alpha albumin Short Alpha Alb Flags Precursor		Carbamidomethyl+C(8)	FTDSENVCQER	18	11	3	3	0	48.7688	2.9498	-	18.5511	29.2717	0.151491	-
	530	P43652	22 599 AFAM HUMAN RecName Full Afamin AltName Full Alpha albumin Short Alpha Alb Flags Precursor		Carbamidomethyl+C(9);Carbamidomethyl+C(10)	TINPAVDHCCK	16	7	3	2	3	26.3304	4.71987	33.2723	0.741225	1.27644	0.245208	2.54489
	530	P43652	22 599 AFAM HUMAN RecName Full Afamin AltName Full Alpha albumin Short Alpha Alb Flags Precursor		None	DADPDTFFAK	16	10	2	4	0	41.9927	23.9676	-	0.664982	9.64738	0.113442	-
	530	P43652	22 599 AFAM HUMAN RecName Full Afamin AltName Full Alpha albumin Short Alpha Alb Flags Precursor		None	ESLLNHFLYEVAR	25	16	4	3	1	15.1071	25.4208	-	0.501118	0.246453	0.623827	3.08533
	530	P43652	22 599 AFAM HUMAN RecName Full Afamin AltName Full Alpha albumin Short Alpha Alb Flags Precursor		None	FLVNLVK	5	4	1	0	0	-	-	-	0.829711		-	-
	530	P43652	22 599 AFAM HUMAN RecName Full Afamin AltName Full Alpha albumin Short Alpha Alb Flags Precursor		None	HELTDEELQSLFTNFANVVDK	11	8	1	2	0	-	5.79525	-	0.314329		0.321468	-
	530	P43652	22 599 AFAM HUMAN RecName Full Afamin AltName Full Alpha albumin Short Alpha Alb Flags Precursor		None	IAPQLSTEELVSLGEK	26	20	5	0	1	27.8309	-	-	0.789586	0.796435	-	-
	530	P43652	22 599 AFAM HUMAN RecName Full Afamin AltName Full Alpha albumin Short Alpha Alb Flags Precursor		None	LPNNVLQEK	10	6	0	1	2	-	-	27.7252	0.928163		-	2.67683
	530	P43652	22 599 AFAM HUMAN RecName Full Afamin AltName Full Alpha albumin Short Alpha Alb Flags Precursor		None	SDVGFLPPFPTLDPEEK	33	17	6	6	4	22.0104	5.93334	33.7445	0.540763	0.455094	0.0859346	0.356124
	protein.key	protein.Accession	protein.Description	protein.Key_ForHomologs	peptide.modification	peptide.seq	All Injections (61)*	Injections Samples (38)*	Injections AV (10)*	Injections IAV (6)*	Injections IRV (7)*	% CV AV #	% CV IAV #	% CV IRV #	% CV RT samples $	% CV RT AV $	% CVRT IAV $	% CV RT IRV $
	7733	P68871	2 147 HBB HUMAN RecName Full Hemoglobin subunit beta AltName Full Hemoglobin beta chain AltName F		Carbamidomethyl+C(11)	GTFATLSELHCDK	52	38	10	1	2	21.6879	-	49.2453	0.908273	0.907649	-	3.2054
	7733	P68871	2 147 HBB HUMAN RecName Full Hemoglobin subunit beta AltName Full Hemoglobin beta chain AltName F		None	EFTPPVQAAYQK	36	24	9	1	1	16.6543	-	-	1.44794	2.23929	-	7.21542
	7733	P68871	2 147 HBB HUMAN RecName Full Hemoglobin subunit beta AltName Full Hemoglobin beta chain AltName F		None	FFESFGDLSTPDAVMGNPK	37	28	6	1	2	22.2457	-	11.6814	0.969747	0.469036	-	0.0264641
	7733	P68871	2 147 HBB HUMAN RecName Full Hemoglobin subunit beta AltName Full Hemoglobin beta chain AltName F		None	LLVVYPWTQR	60	37	10	6	6	27.9691	11.9873	20.3206	0.540718	0.591143	0.100598	2.08422
	7733	P68871	2 147 HBB HUMAN RecName Full Hemoglobin subunit beta AltName Full Hemoglobin beta chain AltName F		None	SAVTALWGK	38	18	8	5	6	38.3556	11.2585	38.9603	0.762577	0.681944	0.119065	2.40801
	7733	P68871	2 147 HBB HUMAN RecName Full Hemoglobin subunit beta AltName Full Hemoglobin beta chain AltName F		None	VHLTPEEK	21	6	4	4	6	40.2589	5.53657	39.8414	1.91431	1.81335	0.152587	3.11772
	7733	P68871	2 147 HBB HUMAN RecName Full Hemoglobin subunit beta AltName Full Hemoglobin beta chain AltName F		None	VLGAFSDGLAHLDNLK	56	38	10	2	5	34.2092	7.80965	32.4211	0.574632	0.615301	0.224191	2.01668
	7733	P68871	2 147 HBB HUMAN RecName Full Hemoglobin subunit beta AltName Full Hemoglobin beta chain AltName F		None	VNVDEVGGEALGR	61	38	10	6	6	18.8162	5.71946	38.7045	0.869347	0.879732	0.187308	2.09061
	protein.key	protein.Accession	protein.Description	protein.Key_ForHomologs	peptide.modification	peptide.seq	All Injections (61)*	Injections Samples (38)*	Injections AV (10)*	Injections IAV (6)*	Injections IRV (7)*	% CV AV #	% CV IAV #	% CV IRV #	% CV RT samples $	% CV RT AV $	% CVRT IAV $	% CV RT IRV $
	7732	P69905	2 142 HBA HUMAN RecName Full Hemoglobin subunit alpha AltName Full Hemoglobin alpha chain AltName		None	MFLSFPTTK	44	28	10	1	5	30.9802	-	35.0444	3.07523	0.652054	-	2.05735
	7732	P69905	2 142 HBA HUMAN RecName Full Hemoglobin subunit alpha AltName Full Hemoglobin alpha chain AltName		None	TYFPHFDLSHGSAQVK	50	36	10	0	4	35.0731	-	57.8656	0.668456	0.776291	-	2.16297
	7732	P69905	2 142 HBA HUMAN RecName Full Hemoglobin subunit alpha AltName Full Hemoglobin alpha chain AltName		None	VADALTNAVAHVDDMPNALSALSDLHAHK	41	30	8	0	3	32.9691	-	83.6222	0.49148	0.570735	-	3.54704
	7732	P69905	2 142 HBA HUMAN RecName Full Hemoglobin subunit alpha AltName Full Hemoglobin alpha chain AltName		None	VDPVNFK	11	4	4	0	3	11.3632	-	46.1533	4.67907	0.614795	-	3.20003
	7732	P69905	2 142 HBA HUMAN RecName Full Hemoglobin subunit alpha AltName Full Hemoglobin alpha chain AltName		None	VGAHAGEYG	9	7	1	0	1	-	-	-	0.847235		-	-
	7732	P69905	2 142 HBA HUMAN RecName Full Hemoglobin subunit alpha AltName Full Hemoglobin alpha chain AltName		None	VGAHAGEYGAEALER	54	38	10	1	5	23.4306	-	34.9032	1.15964	1.12867	-	2.77662
	7732	P69905	2 142 HBA HUMAN RecName Full Hemoglobin subunit alpha AltName Full Hemoglobin alpha chain AltName		None	VLSPADK	5	2	0	1	2	-	-	28.1513	2.2368		-	2.01739
	protein.key	protein.Accession	protein.Description	protein.Key_ForHomologs	peptide.modification	peptide.seq	All Injections (61)*	Injections Samples (38)*	Injections AV (10)*	Injections IAV (6)*	Injections IRV (7)*	% CV AV #	% CV IAV #	% CV IRV #	% CV RT samples $	% CV RT AV $	% CVRT IAV $	% CV RT IRV $
	8731	Q14624	29 930 ITIH4 HUMAN RecName Full Inter alpha trypsin inhibitor heavy chain H4 Short Inter alpha inhi		None	AEAQAQYSAAVAK	10	6	2	2	0	0.585689	4.86005	-	1.62567	0.429941	0.106545	-
	8731	Q14624	29 930 ITIH4 HUMAN RecName Full Inter alpha trypsin inhibitor heavy chain H4 Short Inter alpha inhi		None	ANTVQEATFQMELPK	39	24	5	5	4	34.4858	28.2106	5.09984	3.00692	0.779496	0.35241	1.65886
	8731	Q14624	29 930 ITIH4 HUMAN RecName Full Inter alpha trypsin inhibitor heavy chain H4 Short Inter alpha inhi		None	ETLFSVMPGLK	48	38	10	0	0	23.5705	-	-	0.576541	0.609736	-	-
	8731	Q14624	29 930 ITIH4 HUMAN RecName Full Inter alpha trypsin inhibitor heavy chain H4 Short Inter alpha inhi		None	FKPTLSQQQK	44	22	9	6	6	27.6395	8.07068	41.9603	1.80477	1.51908	0.155129	2.73088
	8731	Q14624	29 930 ITIH4 HUMAN RecName Full Inter alpha trypsin inhibitor heavy chain H4 Short Inter alpha inhi		None	FSSHVGGTLGQFYQEVLWGSPAASDDGR	42	29	6	4	2	26.6842	23.3306	45.4601	0.397545	0.612853	0.861524	13.5962
	8731	Q14624	29 930 ITIH4 HUMAN RecName Full Inter alpha trypsin inhibitor heavy chain H4 Short Inter alpha inhi		None	GPDVLTATVSGK	50	30	7	6	6	19.0238	10.874	36.7588	0.955562	0.922505	0.188532	2.56742
	8731	Q14624	29 930 ITIH4 HUMAN RecName Full Inter alpha trypsin inhibitor heavy chain H4 Short Inter alpha inhi		None	ILDDLSPR	15	10	4	0	0	10.3254	-	-	0.828335	0.797447	-	-
	8731	Q14624	29 930 ITIH4 HUMAN RecName Full Inter alpha trypsin inhibitor heavy chain H4 Short Inter alpha inhi		None	LAILPASAPPATSNPDPAVSR	35	20	6	4	4	68.2871	138.551	81.0624	6.34307	7.48817	9.83216	7.56084
	8731	Q14624	29 930 ITIH4 HUMAN RecName Full Inter alpha trypsin inhibitor heavy chain H4 Short Inter alpha inhi		None	LGVYELLLK	55	37	10	6	2	26.7622	5.62126	3.25223	0.58175	0.604887	0.103109	-
	8731	Q14624	29 930 ITIH4 HUMAN RecName Full Inter alpha trypsin inhibitor heavy chain H4 Short Inter alpha inhi		None	NPLVWVHASPEHVVVTR	43	30	9	0	3	30.6002	-	27.5278	0.797988	0.699227	-	2.37311
	8731	Q14624	29 930 ITIH4 HUMAN RecName Full Inter alpha trypsin inhibitor heavy chain H4 Short Inter alpha inhi		None	QGPVNLLSDPEQGVEVTGQYER	40	28	6	0	5	11.2879	-	21.2873	0.587359	0.75726	-	1.80192
	8731	Q14624	29 930 ITIH4 HUMAN RecName Full Inter alpha trypsin inhibitor heavy chain H4 Short Inter alpha inhi		None	QGPVNLLSDPEQGVEVTGQYEREK	38	24	8	2	3	67.9797	11.5558	83.1478	0.824444	1.16131	0.165297	3.0453
	8731	Q14624	29 930 ITIH4 HUMAN RecName Full Inter alpha trypsin inhibitor heavy chain H4 Short Inter alpha inhi		None	QLGLPGPPDVPDHAAYHPFR	27	19	3	3	2	39.8215	40.7824	5.16902	1.54513	2.28956	1.79299	0.181898
	8731	Q14624	29 930 ITIH4 HUMAN RecName Full Inter alpha trypsin inhibitor heavy chain H4 Short Inter alpha inhi		None	SPEQQETVLDGNLIIR	58	38	10	5	5	32.1965	9.96304	24.9848	0.616997	0.633429	0.126129	1.77963
	* Number of injections in each series in which the peptide was used as HI3 quantitative value. The total number of injections is given between brackets. # Variance (%CV) of the signal intensity of each individual HI3 peptide in the different measurement series. $ Variance (%CV) of the retention time of each individual HI3 peptide in the different measurement series. 'protein.key_ForHomologs' deno…
