# Supplementary material for: Accuracy and Reproducibility in Quantification of Plasma Protein Concentrations by Mass Spectrometry without the Use of Isotopic Standards
Source: PLoS One. 2015 Oct 16;10(10):e0140097. doi: 10.1371/journal.pone.0140097 (PMC4608811; doi:10.1371/journal.pone.0140097)
Supplement: S7 Table — (XLSX) [file pone.0140097.s011.xlsx]

## Sheet: Supplemental Table 7
			Supplemental Table 7. Comparison of plasma proteins Quantified by Hi3 peptide quantitation as well as three targeted proteomics studies
			no	accesion	name	description	median (ng/mL) |	upper (ng/mL) |	lower (ng/mL) |	median (ng/mL)!	ng/mL#	ng/mL*	ng/ml$	within range !	within range#	within range*	within range$	< 2fold !	< 2fold #	< 2fold *	< 2fold $
			1	P02768	ALBU_HUMAN	Serum albumin	43160000	53120000	3.32e+07	73700000	36381879	31436757	7.6377e+07		1			1	1	1	1
			2	-	FIB_HUMAN	Fibrinogen	3026650	4413300	1.64e+06	2600000	2391347	2364421	7.59075e+06	1	1	1		1	1	1	1
			3	P01024	CO3_HUMAN	Complement C3	1387500	1850000	925000	2300000	1500339	876711	4.23624e+06		1			1	1	1
			4	P01023	A2MG_HUMAN	Alpha-2-macroglobulin	2160000	3060000	1.26e+06	1800000	1396993	1436321	4.44754e+07	1	1	1		1	1	1
			5	P02647	APOA1_HUMAN	Apolipoprotein A-I	1405000	1967000	843000	1700000	1329518	1028989	2.11728e+06	1	1	1		1	1	1	1
			6	P00738	HPT_HUMAN	Haptoglobin	1.307e+06	2404000	210000	1300000	221824	1337995	951621	1	1	1	1	1	1	1	1
			7	P04114	APOB_HUMAN	Apolipoprotein B-100	1100000	1.65e+06	550000	970000	155059	127832	1.61896e+06	1			1	1			1
			8	P02790	HEMO_HUMAN	Hemopexin	826500	1.14e+06	513000	910000	274528	399702	975984	1			1	1	1	1	1
			9	-	CO4AB	Complement C4	262250	412000	112500	680000	180012	545703	2.21236e+06		1			1	1	1
			10	P00450	CERU_HUMAN	Ceruloplasmin	472500	675000	270000	350000	429339	400351	376353	1	1	1	1	1	1	1	1
			11	P00747	PLMN_HUMAN	Plasminogen	270000	360000	180000	220000	13546	10435	170708	1				1			1
			12	P02652	APOA2_HUMAN	Apolipoprotein A-II	391500	522000	261000	200000	59846	50255	634401					1			1
			13	P01011	AACT_HUMAN	Alpha-1-antichymotrypsin	442000	612000	272000	180000	229072	150098	251090					1	1	1	1
			14	P02749	APOH_HUMAN	Beta-2-glycoprotein 1	180000	240000	120000	170000	91521	206416	197539	1		1	1	1	1	1	1
			15	P10909	CLUS_HUMAN	Clusterin	108000	144000	72000	150000	113099	195394	137410		1		1	1	1	1	1
			16	P00734	THRB_HUMAN	Prothrombin	108000	108000	108000	140000	3625	3522	103802					1			1
			17	P01008	ANT3_HUMAN	Antithrombin-III	260000	325000	195000	140000	30210	92926	198211				1	1			1
			18	P06727	APOA4_HUMAN	Apolipoprotein A-IV	193500	258000	129000	100000	23872	40524	121449					1			1
			19	P05546	HEP2_HUMAN	Heparin cofactor 2	98400			66000	46806	49450	108032					1		1	1
			20	P01019	ANGT_HUMAN	Angiotensinogen	65000	65000	65000	57000	10548	16153	89471.2					1			1
			21	P02656	APOC3_HUMAN	Apolipoprotein C-III	117000	180000	54000	39000	439	565	114574				1	1			1
			22	P02649	APOE_HUMAN	Apolipoprotein E	45500	70000	21000	31000	8067	27600	31282.5	1		1	1	1		1	1
			23	P02654	APOC1_HUMAN	Apolipoprotein C-I	59679	79572	39786	16000	3040	2526	75762				1				1
				! This study, Hi3 peptide quantitation median obtained from n samples as shown in Table I										within range !	within range#	within range*	within range$	< 2fold !	< 2fold #	< 2fold *	< 2fold $
				# Domanski, D et al. 2012 Proteomics, 12, pages 1222-1243									sum	10	9	7	10	22	12	14	20
				* Percey, AJ et al. 2014 Biochim. Biophys. Acta, 1844, pages 917-926									% total	43.4783	39.1304	30.4348	43.4783	95.6522	52.1739	60.8696	86.9565
				$ Kuzyk, MA et al. 2009 Mol. Cell. Prot., 8,pages 1860-1877														> 2fold !	> 2fold #	> 2fold *	> 2fold $
				| Hortin, GL et al. 2008, Clin. Chem., 54, pages 1608-1616													sum	1	11	9	3
																	% total	4.34783	47.8261	39.1304	13.0435
