# Supplementary material for: Accuracy and Reproducibility in Quantification of Plasma Protein Concentrations by Mass Spectrometry without the Use of Isotopic Standards
Source: PLoS One. 2015 Oct 16;10(10):e0140097. doi: 10.1371/journal.pone.0140097 (PMC4608811; doi:10.1371/journal.pone.0140097)
Supplement: S9 Table — (XLSX) [file pone.0140097.s013.xlsx]

## Sheet: Supplemental Table 9
	Supplemental Table 9. Manually recalculated plasma protein concentrations of samples and reinjected samples.
	Protein	ALBU	CERU	TRFE	HPT	APOA1	APOB	Fib	CO3	CO4	IgA	IgG	IGHM
	Sample	ng/mL	ng/mL	ng/mL	ng/mL	ng/mL	ng/mL	ng/mL	ng/mL	ng/mL	ng/mL	ng/mL	ng/mL
	1	7.64347e+07	570938	3.3391e+06	1.75156e+06	2.18932e+06	1.13492e+06	4.02739e+06	2.96731e+06	851826	713825	4.66623e+06	599398
	2	6.97106e+07	567704	3.12975e+06	2.00261e+06	2.19642e+06	1.07656e+06	1.03576e+06	2.54712e+06	746576	464839	4.31186e+06	162313
	3	6.75142e+07	376460	2.91728e+06	1.32405e+06	1.98202e+06	1.281e+06	3.95495e+06	2.65289e+06	760830	934691	3.81692e+06	416193
	4	7.85632e+07	326486	3.19128e+06	933570	1.99574e+06	621476	3.10747e+06	1.78251e+06	708065	442324	6.47769e+06	365030
	5	1.06241e+08	338116	2.81935e+06	263222	2.05363e+06	430792	2.60756e+06	1.77927e+06	0	479826	5.73681e+06	203447
	6	6.98309e+07	353116	2.87782e+06	2.18022e+06	2.01233e+06	1.14604e+06	4.12819e+06	2.29224e+06	773911	534349	5.59104e+06	100420
	7	7.56474e+07	236612	2.38556e+06	1.30974e+06	1.70432e+06	916112	2.88305e+06	1.89666e+06	469472	769838	4.8665e+06	123503
	8	7.3361e+07	366166	3.42555e+06	1.43056e+06	1.33748e+06	1.54464e+06	5.44203e+06	2.54492e+06	610553	1.48163e+06	5.60468e+06	278827
	9	6.88321e+07	212931	1.90407e+06	583861	1.53527e+06	972432	2.80394e+06	1.83796e+06	481232	217233	3.67837e+06	264358
	10	6.98537e+07	388516	2.42298e+06	1.44601e+06	1.94467e+06	925504	1.97503e+06	2.03237e+06	731942	553661	2.05597e+06	63481.8
	11	7.05678e+07	295441	2.44903e+06	886207	1.99554e+06	1.09062e+06	2.24324e+06	1.69538e+06	432955	619913	3.94734e+06	383326
	12	5.40737e+07	424404	2.22074e+06	1.31467e+06	1.35223e+06	869176	2.80808e+06	2.14499e+06	574199	922512	5.91192e+06	207931
	13	9.57117e+07	303048	2.36682e+06	584534	1.62736e+06	1.11514e+06	2.18399e+06	2.00882e+06	682253	892594	6.00257e+06	204459
	14	6.72139e+07	309546	2.1941e+06	1.09341e+06	1.68457e+06	897227	1.89386e+06	1.69699e+06	428201	926110	3.75161e+06	852278
	15	8.1372e+07	345525	2.39956e+06	924646	1.74201e+06	956339	2.85448e+06	2.60284e+06	0	926104	6.17307e+06	258500
	16	9.10253e+07	370770	3.04844e+06	851569	2.12255e+06	1.26128e+06	2.38273e+06	2.49104e+06	429810	726907	5.82949e+06	192024
	17	6.19547e+07	310852	2.44336e+06	1.14522e+06	1.45437e+06	730091	3.08206e+06	2.42911e+06	469294	330411	5.41613e+06	345553
	18	8.22013e+07	329304	3.00803e+06	1.33441e+06	1.84828e+06	731851	2.76874e+06	2.31592e+06	620652	310700	7.64564e+06	361278
	19	8.20181e+07	305891	3.10248e+06	1.65513e+06	1.15515e+06	1.35476e+06	2.94088e+06	2.52649e+06	807708	1.25842e+06	3.38895e+06	260223
	20	6.39644e+07	327471	2.72596e+06	423922	1.60102e+06	971448	1.84441e+06	2.19567e+06	419202	1.40759e+06	4.80297e+06	235953
	21	6.1641e+07	398920	2.04451e+06	1.01814e+06	1.54165e+06	923855	2.7809e+06	3.35703e+06	722113	1.18455e+06	8.17919e+06	127460
	22	8.05499e+07	449728	2.86801e+06	1.52379e+06	2.57676e+06	759905	2.49548e+06	2.69414e+06	771386	537107	4.71333e+06	215177
	23	8.06676e+07	311987	2.47767e+06	1.0728e+06	1.70894e+06	380522	1.6796e+06	2.14107e+06	748510	903778	2.37312e+06	61879.2
	24	5.13042e+07	233996	2.15253e+06	1.44417e+06	1.079e+06	604453	2.19225e+06	1.60945e+06	465706	881410	3.0568e+06	323841
	25	6.87214e+07	366689	2.39525e+06	1.64155e+06	1.47359e+06	1.11742e+06	2.46234e+06	2.2198e+06	644433	569501	4.25102e+06	161670
	26	7.03459e+07	255535	1.94818e+06	984219	2.01537e+06	712228	1.92361e+06	1.87926e+06	419318	387785	4.22718e+06	178900
	27	8.60337e+07	417942	2.63839e+06	1.85462e+06	2.44441e+06	1.20906e+06	2.68173e+06	2.20748e+06	747281	1.11858e+06	4.5011e+06	319230
	28	7.57939e+07	451586	2.69625e+06	1.77488e+06	1.5992e+06	1.16051e+06	0	2.5365e+06	793070	653811	5.31228e+06	183653
	29	6.6621e+07	670989	2.83309e+06	1.745e+06	1.92877e+06	1.17216e+06	1.77518e+06	3.02329e+06	704012	953329	4.42715e+06	166827
	30	6.18541e+07	391712	2.44893e+06	2.91518e+06	1.45969e+06	967982	2.88986e+06	2.91231e+06	881480	1.12337e+06	7.04022e+06	294463
	31	8.11237e+07	439885	3.122e+06	881538	2.7562e+06	1.18912e+06	3.02613e+06	2.33389e+06	667768	581504	5.07843e+06	99231.3
	4_reinjected	-	-	-	-	-	-	3.10199e+06	-	-	-	-	-
	8_reinjected	-	-	-	-	-	-	4.6238e+06	-	-	-	-	-
	10_reinjected	7.19492e+07	-	-	-	-	-	-	-	-	-	-	-
	17_reinjected	8.50433e+07	-	3.36482e+06	-	-	-	-	-	-	-	-	-
	24_reinjected	6.21098e+07	-	2.65673e+06	-	-	-	-	-	-	-	-	-
	26_reinjected	7.36886e+07	-	-	-	-	-	-	-	-	-	-	-
	31_reinjected	7.59971e+07	-	2.36635e+06	-	-	-	-	-	-	-	-	-
	Data of manually recalculated HI3 peptide quantitation per plasma sample. A number of samples were reinjected and their values used in stead of the prior injection in the final correlation calculation given in supplemental table VIII.
